# Supplementary material for: Maize kernel metabolome involved in resistance to fusarium ear rot and fumonisin contamination
Source: Front Plant Sci. 2023 Jul 19;14:1160092. doi: 10.3389/fpls.2023.1160092 (PMC10394704; doi:10.3389/fpls.2023.1160092)
Supplement: Supplementary file 6 [file Table_2.xlsx]

## Sheet: Supplementary table 2_RILs_3d
Bucket file: Feature peaks detected in the kernel of four resistant (R) and three susceptible (S) recombinant inbred lines (RIL) to Fusarium ear rot 72 hours after inoculation with Fusarium verticillioides
RIL					RIL114	RIL114	RIL114	RIL125	RIL125	RIL125	RIL128	RIL128	RIL128	RIL152	RIL152	RIL152	RIL279	RIL279	RIL279	RIL319	RIL319	RIL319	RIL348	RIL348	RIL348
Time (hours)					72h	72h	72h	72h	72h	72h	72h	72h	72h	72h	72h	72h	72h	72h	72h	72h	72h	72h	72h	72h	72h
Replicate					1	2	3	1	2	3	1	2	3	1	2	3	1	2	3	1	2	3	1	2	3
Resistance to FER					R	R	R	R	R	R	R	R	R	S	S	S	R	R	R	S	S	S	S	S	S
RTmin	Mmeas	mzmeas	Ions	Adduct
0.75	222.209	112.112	[M+H+H]2+	ION=[M+H+H]2+	22966	4724	17646		43498					22716	8932	6774	21436			25970	35574	36682			33516
0.75	111.105	112.112	[M+H]+	ION=[M+H]+				35240		38010	33662	36264	36220					32468	30158				30466	36148
0.75	128.131	129.139	[M+H]+	ION=[M+H]+	30482	7086	24006	44818	57412	45892	42316	42436	45200	28324	10020	8466	23818	37140	36274	30966	41732	44194	41436	46366	47090
0.75	145.158	146.165	[M+H]+	ION=[M+H]+	51978	13676	48008	86712	101926	89094	72692	74940	80246	56170	23612	19060	55406	69688	65996	61824		82002	69836	80922	80244
0.76	502.163	252.089	[M+H+H]2+	ION=[M+H+H]2+	14184	15662	15838	20628	17928	19722	17322	15842	16238	14832	13874	14404	11700	12640	9932	21610	20590	17322	19484	18514	18914
0.77	178.017	161.016	[M-H2O+H]+, [M+H]+	ION=[M-H2O+H]+	20876	18750	22120	28716	24386	30368	22670	22510	20340	22112	19054	17792	22418	21232	23918	21482	23770	22802	24720	22818	20772
0.77	507.168	254.591	[M+H+H]2+	ION=[M+H+H]2+	20904	20284	18256	22338	23170	24116	17106	19044	20216	19550	18672	19978	19888	20892	16944	23614	22818	18830	20780	19568	20526
0.78	317.102	159.558	[M+H+H]2+	ION=[M+H+H]2+		32058									22436	28508
0.78	387.946	386.939	[M-H]-	ION=[M-H]-	63468	55038	71340	53158	70058	66002	47240	72986	65978	50604	54934	65442	76770	74278	65156	53120	56950	56772	61686	71164	83096
0.79	127.012	110.009	[M-H2O+H]+, [M+H]+	ION=[M-H2O+H]+		254452	872734	838406	981824	774290	629316	982158	915954	700046	168690	189564	441030	897048	829702	728588	777136	720486	892164	1017288	1011888
0.79	131.991	114.987	[M-H2O+H]+, [M+H]+	ION=[M-H2O+H]+	39646	13490	35874	33430	37476	33758	24916	37948	36560	26964	7422	9900	17212	31072	33276	31298	30984	28918	35814	37718	40172
0.79	123.017	124.024	[M+H]+	ION=[M+H]+		7862	28262		24914	20984	18798	22390	21206	14916	5312	5040	10674	14684	22294	14564	15472	18574	26002	22472	23976
0.79	246.034	124.024	[M+H+H]2+	ION=[M+H+H]2+	25286			26800
0.79	263.983	132.999	[M+H+H]2+	ION=[M+H+H]2+	33824																		32646
0.79	294.083	148.049	[M+H+H]2+	ION=[M+H+H]2+	36900	18398	34950	37762	40376	34422	26976	41050	35850	30796	12512	13604	20444	31742	28372	32312	32984	30784		38104	39748
0.79	297.064	149.539	[M+H+H]2+	ION=[M+H+H]2+	33284	15484	32622	33940	39698	34168	23694	35258	36818	25810	12924	12584	17320	28800	24768	34446	31906	31198	35282	40806
0.79	312.098	157.056	[M+H+H]2+	ION=[M+H+H]2+	83872	38152	77616	81448	84742	76218	60232	85112	84846	63906	29180	31988	43696	71602	60480	75670	77998	66968	83952	87414	90804
0.79	159.986	158.978	[M-H]-	ION=[M-H]-	219078	214410	235624	218312	259508	231226	192294	247700	225418	189596	204236	221360	231578	248056	234420	214880	194776	208046	231760	237274	261032
0.79	158.551	159.559	[M+H]+	ION=[M+H]+	60280		53290	50858	59152	52318	41432	55118	52516	52888			42642	60920	51866	46258	52488	44426	51910	58042	56224
0.79	330.11	166.062	[M+H+H]2+	ION=[M+H+H]2+	84870	32826	74074	84950	92348	84104	60010	85814	86544	63252	27376	31044	41334	68218	58084	75020	78114	72130	90652	97120	99134
0.79	335.114	168.564	[M+H+H]2+	ION=[M+H+H]2+	305714	139838	267136	279152	327962	300518	220962	311212	305724	263080	125776	141292	198394	302192	261982	277610	285584	261326	309888	344330	357812
0.79	353.126	177.57	[M+H+H]2+	ION=[M+H+H]2+	147542	67750	131738	164184	184872	164784	110116	168300	161088	128462	62624	74536	94804	145978	120554	149688	155918	132240	177718	192244	201882
0.79	181.955	182.962	[M+H]+	ION=[M+H]+	93188		69878	57482	77624	48738	39612	87432	81340	44624			23304	81334	63924	52072	55968	46102	73510	87376	83554
0.79	217.976	200.973	[M-H2O+H]+, [M+H]+	ION=[M-H2O+H]+	113156	10388	81852	76128	99330	64248	49592	109108	96970	56748	5108	6176	25102	90436	72698	66542	74190	60968	89434	113368	112038
0.79	238.026	239.033	[M+H]+, [M-H2O+H]+	ION=[M+H]+	138858	65916	128362	136838	140044	127538	109876	135006	137164	107140	52000	58234	82534	117082	100726	127828	134372	117938	145108	154496	150746
0.79	240.992	242	[M+H]+, [M-H2O+H]+	ION=[M+H]+	107048	7960	78530	73492	100772	62888	43284	107866	95248	56174	5218	7036	25380	90188	75318	62280	72110	59972	97146	115916	116424
0.79	256.037	257.044	[M+H]+	ION=[M+H]+	38252	20030	39138	46810	47044	46466	33050	44134	43686	33568	16344	18152	24466	33376	27770	44572	42520	41200	46022	47616	50984
0.79	273.966	272.959	[M-H]-	ION=[M-H]-	134214	127752	146324	138544	165836	151440	107726	172406	150826	113262	127564	141632	158008	154730	151260	125756	125140	122354	152698	166942	176746
0.79	299.068	300.075	[M+H]+, [M-H2O+H]+	ION=[M+H]+	88638	35512	77236	84042	89210	80842	64254	83670	89538	69108	27034	28618	47678	77358	67934	74976	79506		88316	92252	97622
0.79	317.078	318.086	[M+H]+	ION=[M+H]+	53682	22978	48388	56696	63712	59630	44458	57792	62268	43458	19064	19396	29260	50174	38878	58322	60328	53468	64740	67748	70316
0.79	322.084	323.091	[M+H]+	ION=[M+H]+	20102	8734	19204	17606	20916	17992	13232	19890	19252	17182	6432	7948	12742	22284	17190	16006	18730	17224	18664	21702	22168
0.79	777.896	387.941	[M-H-H]2-	ION=[M-H-H]2-	26444	26168	36196	29566	35694	30064	22978	39440	31760	25070	27436	26644	32274	35122	31100	23918	31036	21016	33770	34104	33632
0.79	413.048	414.055	[M+H]+	ION=[M+H]+	29992	8730	25824	27266	32740	25746	18936	28722	28688	22100	5762	7520	15390	26262	21508	24682	27836	21840	28640	33862	32100
0.8	99.0175	100.025	[M+H]+	ION=[M+H]+	22390	6050	22710	21036	24114	20326	18234	20874	21604	14072	5256	5362	12526	18848	17352	21962	18880	18442	22122	25078	23858
0.8	103.997	105.004	[M+H]+	ION=[M+H]+	17726	4846	17146	17146	19458	15688	10990	17980	17248	12506	3698	4470	7484	15612	12770	16848	16408	15448	20220	20040	20306
0.8	254.024	128.02	[M+H+H]2+	ION=[M+H+H]2+	843318		736012	759332		708248		882668		584374					682164			657734	841360
0.8	279.052	140.533	[M+H+H]2+	ION=[M+H+H]2+													30358	47208		45438
0.8	145.023	146.03	[M+H]+	ION=[M+H]+		36630	119964							93170			56124			116256	130890			174020
0.8	290.046	146.03	[M+H+H]2+	ION=[M+H+H]2+	138610			128262	159698	127728	94740	152874	139336		27462	28960		114214	110768			114120	150628		178426
0.8	148.946	149.953	[M+H]+	ION=[M+H]+	13982	6810	16206	21750	19322	22990	20906	15474	13002	11186	5116	4830	11642	20590	17658	21914	23734	26098	17336	14848	16278
0.8	150.029	151.036	[M+H]+	ION=[M+H]+	88184	22840	69278	66876	85784	71032	51998	82540	82080	63222	18798	21932	41662	85894	77496	62382	70914	61534	82844	94954
0.8	346.087	174.051	[M+H+H]2+	ION=[M+H+H]2+	8210	8146	12052	24554	23650	22356	11044	24802	20294	10262	9316	10562	7000	9300	10194	16254	15996		36986		38130
0.8	250.153	251.16	[M+H]+	ION=[M+H]+	13532	7442	9892	30426	39606	9668	31728	103350	86002	13028	3960	16758	12140	18452	46760	16310	17250	27768	85918	60962	57618
0.81	124.979	125.986	[M+H]+	ION=[M+H]+	8508	4002	9072	20150	18382	16548	9188	21948	16830	9358	3174	4448	4626	9358	10750	10944	11394	14896	28316	38750
0.81	328.082	165.048	[M+H+H]2+	ION=[M+H+H]2+	8506	7878	10978	21680	23082	20404	9748	19404	17242	10796	8186	10960	6744	10672	10032	14440	13984	17180	29350	40220	32966
0.83	129.079	130.086	[M+H]+	ION=[M+H]+	118460	34996	95270	151376	212234	147148	223370	254668	227834	171062	43266	58132	109208	212442	241780	201528	177250	187612	240032	180822	197450
0.84	146.106	147.113	[M+H]+	ION=[M+H]+	49116	12670	41466	59300	96650	64598	92564	104928	113226	71492	15112	24454	37322	86276	111110	84028	71766	79102	110320	73410	91596
0.84	165.944	164.936	[M-H]-	ION=[M-H]-	4622	4576	6820	9996	13650	13166	7574	25488	18132	2152	3890	3916	15472	19036	14246	3992	3760	6740	15296	23492	21016
0.85	251.038	252.045	[M+H]+	ION=[M+H]+	18306	15912	19444	20618	21492	21716	16646	19864	20196	18490	19488	18826	14184	17322	12930	19432	20692	17858	21974	24764	25190
0.85	260.029	259.022	[M-H]-	ION=[M-H]-	39756	49264	55772	74780	82342	120782	77832	101658	111480	47818	86318	67722	99326	117810	102050	91968	81210	92448	54764	61172	69934
0.86	297.89	296.882	[M-H]-	ION=[M-H]-	25508	23186	19928	20020	14970	16766	16828	13728	15386	25386	22650	20246	15484	14470	14108	21654	22950	17518	15168	17974	14396
0.86	343.991	342.984	[M-H]-	ION=[M-H]-	10400	18052	13030	18858	22382	32904	25870	21304	23872	19922	24706	20994	21328	24898	19792	22970	27862	28618	14906	15512	20546
0.87	163.067	202.03	[M+K]+, [M+H]+	ION=[M+K]+	56844	9468	36764	77504	117604	65628	81160	169442	112250	48054	11078	10354	84488	173072	213084	108624	99704	126418	89938	96198	69416
0.87	230.982	231.989	[M+H]+	ION=[M+H]+	22592	6784	22094	26588	36782	27668	17432	18666	20316	25872	5914	6092	16430	19744	15258	20746	17510	19866	50712	50472	48374
0.87	297.986	336.949	[M+K]+, [M+H]+	ION=[M+K]+	26782	14452	25620	41688	42862	57172	42550	44292	55012	29592	12830	12980	29702	54766	42586	52762	49652	46042	30456	31598	38420
0.87	373.898	374.905	[M+H]+	ION=[M+H]+	12506	7058	12576	20012	19280	27108	21880	19072	26808	16104	5354	3988	14140	22340	16298	23212	24140	23918	13038	15386	16574
0.88	101.048	102.055	[M+H]+	ION=[M+H]+	359092	181680	266432	430714	618042	396726	505906	784676	588812	314052	126898	141144	460052	806588	1053940	569208	475026	615594	475394	442710	413366
0.88	109.064	110.071	[M+H]+	ION=[M+H]+	50946	20382	32030	61086	93978	54900	37078	46384	47926	39564	20088	17980	30096	38204	41398	47636	34856	48846	120368	96664	110308
0.88	121.917	122.925	[M+H]+	ION=[M+H]+	182114	160436	220984	273392	228374	238190	188592	225744	200138	249156	122216	137866	218718	185110	177580	233198	244834	221168	244598	259610	237904
0.88	129.967	128.96	[M-H]-	ION=[M-H]-	93614	101534	97610	90882	62982	84278	74524	69950	80812	105622	87048	87558	74096	70722	68866	87904	100868	87870	72572	89712	72420
0.88	181.937	180.93	[M-H]-	ION=[M-H]-	44368	53300	58602	56240	56582	66522	37930	60038	52344	38956	49470	54256	59928	64416	53424	62174	48990	48928	51130	55364	51326
0.88	205.879	206.886	[M+H]+	ION=[M+H]+	55956	55942	63302	87370	65730	74548	59232	62492	65818	82976	38124	48030	77792	56206	49654	74252	80368	62834	68854	78056	67350
0.88	211.844	212.851	[M+H]+	ION=[M+H]+	135980	24394	141624	158520	156302	162402	104914	169424	143904	113922	14442	15844	70198	167216	144670	157888	156808	150204	158552	163244	152720
0.89	111.888	112.896	[M+H]+	ION=[M+H]+	14602	2202	13126	34606	19710	20548	31692	29968	30474	10240	1778	1484	3608	18010	16246	23792	22442	25434	42222	40278	32688
0.89	180.954	181.962	[M+H]+	ION=[M+H]+	52520	21756	62856	93892	84066	79662	87780	99418	120618	64996	13940	15430	57328	85988	63262	108870	94944	87918	74910	84114	80418
0.89	189.004	187.997	[M-H]-	ION=[M-H]-	11874	16002	15426	19236	17214	17158	17468	20262	20636	20184	15354	14652	20600	23314	15732	21318	22230	16564	14782	15816	14562
0.89	207.965	208.973	[M+H]+	ION=[M+H]+	181588	15780	118534	105806	219998	103228	117824	157154	94212	171868	22826	40840	75140	121606	92344	95102	160114	197816	240960	370920	438658
0.9	164.96	165.967	[M+H]+	ION=[M+H]+	19300	4142	29754	38096	26926	35248	50816	59564	65654	15624	2076	2650	10986	29270	12016	34716	38528	33810	24304	49270	34350
0.9	246.905	247.912	[M+H]+	ION=[M+H]+	19486	5000	13738	40928	32336	30236	26306	33042	31626	13800	1900	1612	11144	26194	16148	20838	28684	30658	28546	24572	26740
0.91	193.025	194.033	[M+H]+	ION=[M+H]+	9796		7506	13952	21126	10132	7164	11474	9748	9252		1654	6448	10252	8344	6868	7506	10410	24934	26390	27232
0.91	230.029	229.022	[M-H]-	ION=[M-H]-	19934	11346	15612	12072	20852	12674	15832	17372	13484	16388	12998	20516	22900	24664	20306	13620	18082	18996	18292	18528	24408
0.92	173.888	174.895	[M+H]+	ION=[M+H]+	68542	17264	63708	68676	78712	74048	51166	70250	62376	70190	9972	12614	47634	70886	70306	72932	70640	70690	66764	70404	61378
0.92	174.111	175.119	[M+H]+	ION=[M+H]+	91658	28314	68060	90692	187722	82466	59594	133982	83190	102034	35290	28048	112904	133462	150100	115532	75120	110936	196250	154904	129048
0.92	184.025	185.033	[M+H]+, [M+K]+	ION=[M+H]+	207582	27862	126028	152670	319342	146862	255824	281166	244302	225972	22974	41518	165394	325436	296984	156120	219722	240978	308668	354380	360286
0.92	285.106	284.098	[M-H]-	ION=[M-H]-	23518	47092	47788	53546	55274	58010	49508	64092	71618	27502	60580	32736	56540	62532	38252	75968	61360	62866	40836	60478	48360
0.93	105.043	104.036	[M-H]-	ION=[M-H]-	15016	21304	22106	20544	22342	28048	20760	28094	30090	16342	21530	17066	24428	29292	19692	33596	21524	23498	18506	25566	19100
0.93	103.1	104.107	[M+H]+	ION=[M+H]+	1316056	643624	1274208	1758910	1676894	1792172	1270684	1336312	1292128	985634	449690	396594	650142	1329126	1313586	1391560	1446192	1450986	1601348	1305626	1403632
0.93	155.069	156.077	[M+H]+, [M-H]-	ION=[M+H]+	45228	13376	33442	45978	80864	53350	33110	43334	40900	41792	15480	16284	33356	40646	37568	40728	34230	40462	96448	96508	101720
0.93	170.009	171.017	[M+H]+	ION=[M+H]+	64476	11186	48356	50208	89744	52136	40270	74478	45728	81988	15714	15404	31052	46168	36056	48092	63938	88826	94536	137318	165444
0.93	220.033	221.04	[M+H]+	ION=[M+H]+	19558	5152	31646	32754	24598	32264	22004	39694	40374	13102	3564	2382	4376	18154	11666	34428	26836	26730	31106		19888
0.93	221.022	222.03	[M+H]+	ION=[M+H]+	18676	7132	23288	29584	27918	28224	12310	14514	13168	23316	6822	6180	19270	32316	45418	41884	28118	25138	24424	31538	21732
0.93	299.121	298.114	[M-H]-	ION=[M-H]-	17040	23924	31446	44440	45098	62580	50756	63176	66274	22864	32616	26594	73070	80712	52350	54392	48864	43930	25744	30884	27268
0.94	109.064	110.071	[M+H]+	ION=[M+H]+	44698			47572	76136	50200	34118		42876						33344	40938		40230	97200		94590
0.94	132.053	131.046	[M-H]-	ION=[M-H]-	45476	12516	35022	26436	57206	30870	29748	46102	22980	50108	28284	44974	37816	34670	33232	32662	44980	66948	60214	87812	125110
0.94	183.066	184.073	[M+H]+	ION=[M+H]+	58234	58058	73878	83484	68164	92284	36276	38576	35542	72584	55162	54192	87334	85912	126460	126960	72800	65974	55520	76600	48090
0.94	218.019	219.027	[M+H]+	ION=[M+H]+	55446	14830	67254	106272	69434	92330	73318	110074	117066	43238	11608	10034	19974	69700	51166	123104	100960	90174	105676	135860	92404
0.94	263.1	264.107	[M+H]+, [M-H2O+H]+	ION=[M+H]+	1414	2070	2200	11494	10704	3364	5106	29446	24954	1932	1374	5508	4906	4020	26768	4936	4310	8566	18266	15362	16018
0.94	312.117	311.109	[M-H]-	ION=[M-H]-	58526	17214	48100	31438	73392	46034	37948	55648	32364	55360	43884	53856	46568	55006	47346	46632	58554	95038	89278	130672
0.94	332.063	333.07	[M+H]+	ION=[M+H]+	2572		2406	6406	11626	2774		15678	8194	2374		4134			5348			7696	33772	40126	65666
0.94	350.062	351.07	[M+H]+	ION=[M+H]+	42768	11392	40242	144230	86704	153122	45974	34352	54242	29378	7564	4306	18430	55418	41858	42142	49104	42894	35072	39608	41116
0.95	100.063	101.071	[M+H]+	ION=[M+H]+	79438	37376	51740	49052	103722	50600	95300	78836	66812	103714	34144	63908	107256	96816	97092	52162	85072	84430	105696	125774	116874
0.95	115.028	116.035	[M+H]+	ION=[M+H]+	34792	28668	23760	36340	42572	32484	25724	31490	24752	46126	26614	34976	34768	22858	22788	21552	35238	41184	39144	48994	54642
0.95	133.038	132.03	[M-H]-	ION=[M-H]-	79674	93682	61084	111960	103568	82944	87082	118174	102090	90532	59586	64630	105688	98504	97938	63450	92892	99014	94112	80312	89968
0.95	182.079	181.071	[M-H]-, [M+H]+	ION=[M-H]-	87188	117988	137482	103450	116254	113254	110186	140594	116060	85404	108048	93934	63922	85836	74028	102626	93242	108542	126910	56964	81170
0.95	196.058	195.051	[M-H]-	ION=[M-H]-	43098	48444	57566	49688	45838	56652	30584	46206	47324	39804	35684	43268	42158	41612	37318	44248	44356	52640	79362	45726	44018
0.95	204.061	205.068	[M+H]+	ION=[M+H]+	15394	28682	27286	20802	14356	23398	17672	28702	18900	19056	28882	18812	9464	8706	9086	20078	17306	16020	17218	7650	7702
0.95	226.069	225.061	[M-H]-	ION=[M-H]-	232746	325368	278424	292090	260266	298732	308652	328330	344286	251806	313826	248242	277370	283542	287768	366370	338102	328330	364982	351312	303200
0.95	228.083	227.075	[M-H]-	ION=[M-H]-	24660	36852	41342	29114	30850	31652	31360	37052	38280	25112	32094	32016	19342	27276	22132	32612	25872	30944	38756	17304	24610
0.95	257.103	258.11	[M+H]+	ION=[M+H]+	8138	6562	8086	21442	18642	14360	10804	13650	8612	19534	12348	19396	7142	6424	10440	7540	4198	9134	19782	34480	30880
0.95	326.132	325.125	[M-H]-	ION=[M-H]-	91786	65622	77926	58846	122552	68862	126016	119622	103218	96614	66570	108188	163636	158088	161646	96816	124408	110374	145302	162814	154686
0.95	327.122	326.115	[M-H]-	ION=[M-H]-	54620	59784	59796	42654	45768	37856	68244	79318	74680	63648	48006	46332	61942	51524	44618	65270	78188	72000	74106	79724	77510
0.95	360.126	359.119	[M-H]-	ION=[M-H]-	13232	34024	16418	18494	12982	18110	19366	19338	22428	17406	28634	18118	16204	17142	18122	27564	21866	21232	28970	37426	18424
0.95	278.04	277.033	[M-H]-	ION=[M-H]-	76236	97982	75094	63978	55886	48786	50976	70902	66246	101984	79650	71944	79592	69138	95236	83792	69330	63824	63712	67804	52598
0.96	120.043	119.035	[M-H]-	ION=[M-H]-	13790	17800	14856	18534	13560	18782	18540	20474	19158	14508	18748	15194	13382	18828	17386	23000	22282	21848	20820	23470	20080
0.96	128.049	129.056	[M+H]+	ION=[M+H]+	27258	29136	42112	32148	30916	32694	30660	35246	36230	31360	26850	22232	17570	22538	25778	30362	25788	28352	42384	16322	21394
0.96	147.053	130.05	[M-H2O+H]+, [M-H]-, [M+H]+	ION=[M-H2O+H]+	1440894	701926	1014466	997882	1829638	991884	1628638	1517788	1352328	1822576	605136	1036046	1907248	1615966	1669622	1032622	1565754	1579456	1962042	2278958	2124298
0.96	166.048	165.041	[M-H]-	ION=[M-H]-	97398	97774	117024	128022	111322	141298	51038	55876	55006	56094	62940	65180	111608	106560	105786	107232	108630	102452	84272	102796	96408
0.96	202.045	203.053	[M+H]+	ION=[M+H]+	34044	86826	48942	56036	30940	49318	43672	58734	45286	49440	92938	73162	45794	30888	34620	58240	52672	41742	38992	44846	32186
0.96	180.063	215.033	[M+Cl]-, [M-H]-, [M-H-H2O]-	ION=[M+Cl]-	222754	286694	206308	352976	269050	196054	440012	498740	432586	331594	308006	301706	393120	323224	344436	307134	346030	395534	567792	748390	563756
0.96	233.09	234.098	[M+H]+	ION=[M+H]+	3092	5488	5646	20738	13836	5026	17908	65070	50256	5622	3208	9696	9456	6594	11712	10130	9470	13932	45438	41390	39906
0.96	265.116	266.124	[M+H]+, [M-H2O+H]+	ION=[M+H]+	3390	9010	6510	42924	31990	6102	15284	79612	55534	4326	3354	6480	4636	4158	11372	8316	6712	29404	132684	29822	66240
0.96	272.1	273.108	[M+H]+	ION=[M+H]+				8768	12432	2474	5514	24332	15638	2906		16142	6772	4490	29700	3814	3666	11872	48206	31998	35800
0.96	308.122	309.129	[M+H]+, [M-H2O+H]+	ION=[M+H]+	5952	5716	4982	17796	36056	5640	14046	53784	40264	8210	3708	44482	16434	13786	79834	8408	9330	27818		76990	94922
0.96	440.091	439.084	[M-H]-	ION=[M-H]-	98264	91586	93366	76318	84892	82376	57840	92402	77968	104570	76524	93920	86678	86948	95000	88036	86290	74250	65958	65512	67820
0.96	472.082	471.075	[M-H]-	ION=[M-H]-	13436	18184	23770	25370	12940	27372	14712	16632	17564	13382	19816	18376	13958	14440	11932	25876	18248	14170	10450	8406	13134
0.97	103.063	104.07	[M+H]+	ION=[M+H]+	49402	38796	67186	149294	243576	84710	262630	263968	228356	74840	46562	45684	63492	80766	47136	81906	132832	205726	196598	199586	317822
0.97	105.042	106.05	[M+H]+	ION=[M+H]+	99724	93854	118616	164710	156434	150434	159076	169320	180674	149536	89834	67290		130890	130174	185850	162842	169952	125256	150452	121948
0.97	132.053	133.061	[M+H]+	ION=[M+H]+	428962	54912	261556	236636	510982	274276	256240	329608	190270	476426	107336	173054	197686	237726	223926	202738	360562	502224	452500	618920	850184
0.97	269.111	270.118	[M+H]+, [M-H2O+H]+, [M-H]-	ION=[M+H]+	11854	4974	13804	15406	18982	17196	33142	30178	32990	14486	4056	5104	10802	14380	8980	14492	19116	20060	14636	24366	24642
0.97	378.093	377.086	[M-H]-	ION=[M-H]-	83968	91208	72208	164362	150244	103626	169470	188418	147792	106274	106306	127984	166288	141904	131168	109250	111500	161240	228608	265024	247880
0.97	380.072	381.08	[M+H]+	ION=[M+H]+	559864	106440	541294	770764	687368	632858	481764	746132	744292	397092	78156	82046	206080	661100	466480	703842	663360	611076	674914	845190	687428
0.97	431.164	432.171	[M+H]+	ION=[M+H]+	36162	13570	44714	52478	62758	52186	111378	97800	100382	41568	10600	13302	38276	50674	32746	44582	62352	65490	46328	88416	82520
0.97	447.159	448.166	[M+H]+	ION=[M+H]+	21930	12680	24542	33084	33882	28702	32422	35258	34520	29922	12844	10830	23776	26640	28838	30390	34644	36474	23948	24900	24690
0.97	474.17	473.163	[M-H]-	ION=[M-H]-	51626	13004	40884	26870	67216	32344	45692	50214	31140	60168	36490	64442	46076	45906	37610	31560	56710	84838	70190	100352	148604
0.97	475.157	474.15	[M-H]-, [M+H]+	ION=[M-H]-	50576	43394	42482	84518	67938	56562	72832	90160	80688	56488	39072	49026	77260	66294	51208	46922	73136	74486	53528	51330	73710
0.97	489.171	488.164	[M-H]-	ION=[M-H]-	130224	126568	156766	137228	132196	105668	194030	194844	203042	140474	115428	126570	161448	138054	111570	146220	177124	172784	169922	150098	183826
0.97	489.17	490.177	[M+H]+	ION=[M+H]+	82606	59208	102534	111280	84474	95258	102498	116874	109670	96502	38606	42720	63290	70110	56326	85540	110650	96492	100998	81898	98786
0.97	522.179	521.172	[M-H]-	ION=[M-H]-	24342	33470	28430	28344	19334	31500	22758	29530	29548	24298	30668	26012	23138	21488	25562	36206	32546	27722	33990	32548	27440
0.97	722.189	723.196	[M+H]+	ION=[M+H]+	40814	5600	36836	47786	39814	39580	35092	54294	43894	26336	4460	4580	14090	41000	27844	37820	48134	43034	39490	51798	47998
0.97	782.208	781.2	[M-H]-	ION=[M-H]-	69374	49210	55298	38890	54706	48180	40098	46386	44220	67466	50282	60068	67280	66752	69320	45762	44876	51924	36944	29868	35664
0.97	816.285	815.278	[M-H]-	ION=[M-H]-	26226	7066	17970	15004	36642	16456	19640	22662	11044	25772	19718	27200	20344	21838	20370	12888	21660	36890	34846	52672	64022
0.97	830.302	829.295	[M-H]-	ION=[M-H]-	48368	22804	29652	25810	70730	29258	57930	44910	32752	46588	25334	55360	80606	76666	85462	29278	38746	53160	60424	63868	67650
0.97	831.295	830.288	[M-H]-	ION=[M-H]-	31166	22478	22342	21770	37116	23892	37054	28492	23544	30732	20304	30260	38114	24232	33816	21560	30896	34348	35866	35814	41712
0.97	1064.31	1065.32	[M+H]+	ION=[M+H]+	18222		13898	23126	21482	20228	18536	26080	22448	13584	2632			19584	15480	19690	21810	20748	19584	24208	25442
0.98	119.058	120.066	[M+H]+, [M-H]-	ION=[M+H]+	99958	65338	118410	231444	219784	229286	292854	289958	289774	176642	76250	74002	236208	266064	298938	212344	238858	229866	143006	136314	125362
0.98	276.087	277.095	[M+H]+	ION=[M+H]+	16372	9906	16846	22004	19148	21580	17452	18170	19040	15634	8074	9354	10282	15434	14566	17914	17968	18570	19792	21422	30590
0.98	405.112	404.104	[M-H]-	ION=[M-H]-	7862	7328	8744	20542	17124	18146	16260	15322	14936	7396	7442	24204	8156	8128	6026	22062	15186	25770	11242	18942	10260
0.98	440.093	441.1	[M+H]+	ION=[M+H]+	18642	23634	21624	18626	15466	21988	11206	11032	10078	21084	20400	19662	20182	15854	21610	19370	16524	15854	11186		9036
0.98	461.174	460.167	[M-H]-	ION=[M-H]-	14070	16140	20910	36200	45746	44398	46558	49884	52272	21298	23252	22976	49286	59494	48848	32782	34402	38282	18664	24690	28356
0.98	461.177	462.184	[M+H]+	ION=[M+H]+	18436	9250	19824	39608	38334	40728	47312	47332	42984	29706	11044	12164	37262	46236	46860	30232	37870	36694	19976	21994	21996
0.98	1466.44	732.212	[M-H-H]2-	ION=[M-H-H]2-	30590	33128	31912	22348	23332	24866	17088	27084	22844	28954	23824	23732	27302	23702	28108	29398	25086	20902	20510	21688	15534
0.98	1808.55	903.269	[M-H-H]2-	ION=[M-H-H]2-	33180	28400	29806	23332	24240	28256	15004	25340	19934	31646	27146	25714	26772	31084	33146	28796	26670	18778	23190	22478	23718
0.98	2150.67	1074.33	[M-H-H]2-	ION=[M-H-H]2-	22132	21834	19062	19484	20046	18536	12614	19552	19092	18820	21570	15766			21626	18046	17392	17274	16788	18128	17498
0.98	447.158	446.151	[M-H]-	ION=[M-H]-	19858	24916	24292	31400	44736	35312	38086	40822	39512	24798	29406	23280	32472	38238	33270	41276	37672	38860	27904	34784	31806
0.99	342.116	341.109	[M-H]-, [M+H]+	ION=[M-H]-	218926	251384	238184	277392	284446	287140	265318	251792	270762	235918	261652	258976	198398	223906	236200	265566	262702	263900	263556	275420	255746
0.99	388.122	387.114	[M-H]-	ION=[M-H]-	834704	954772	945282	982168	985420	1088554	965468	880544	955376	852066	979724	944564	811058	861508	931606	939592	916120	941474	874690	878066	860848
0.99	684.233	683.226	[M-H]-, [M+Cl]-	ION=[M-H]-	688698	730760	678502	786664	760302	813196	782352	700644	707630	751618	742580	713446	594846	605964	647082	727532	769036	751924	644390	642510	656338
0.99	799.296	798.288	[M-H]-	ION=[M-H]-	21780	16762	19256	17904	20620	17332	18970	26590	17466	9126	9522	8490	44586	30640	11572	16342	14706	14322	27218	66560	63604
1	358.159	180.087	[M+H+H]2+	ION=[M+H+H]2+					231728						91570	91278		197798	200950
1	197.09	180.087	[M-H2O+H]+, [M+H]+	ION=[M-H2O+H]+	202178	111054	202120	260256		261514	246144	215842	240210	188910			128406			253854	248176	240114	243828	216120	198650
1	457.179	458.187	[M+H]+, [M-H]-	ION=[M+H]+	22534	5364	17730	25254	38232	23074	25262	42094	25712	9592	2852	3790	26710	38720	15162	16560	23038	23850	35946	91386	91956
1	730.238	729.231	[M-H]-	ION=[M-H]-	139928	137486	131318	154130	152916	160976	153626	135080	149478	140902	141562	137050	117788	130444	128908	134966	154604	139766	131438	133886	133678
1	1026.35	1025.34	[M-H]-	ION=[M-H]-	248300	271056	231774	277884	273220	284804	284084	278236	283520	283994	255268	261780	208902	208422	239750	249294	279626	292010	222940	240662	222592
1.01	114.03	115.038	[M+H]+	ION=[M+H]+	18320	15280	19148	25150	23616	24960	21636	22032	23002	19270	14100	14500	15438	17692	18610	24104	23308	22882	23034	23758	54642
1.01	115.065	116.071	[M+H]+, [M+Na]+	ION=[M+H]+	1045828	480938	881884		1748596	1027824	1223908	1814280		572572	303276	294960	1770260	1654800	696592	926314	1022954	1062816	1791190	4492376	4447114
1.01	117.079	118.086	[M+H]+	ION=[M+H]+		155282								6114	6126	8750	92326	115134	63206					177448	121476
1.01	126.032	127.039	[M+H]+	ION=[M+H]+	456682	349710	472304	572748	534918	566658	542994	486716	530992	465928	313500	306894	353082	432232	445704	520638	528598	535630	480316	472638	436862
1.01	162.053	163.06	[M+H]+, [M-H2O+H]+	ION=[M+H]+	1651090	1053160	1677926	2030246	1910462	2146166	1983762	1780810	1936090	1592670	900910	918196	1172060	1559088	1648592	1873178	1911308	1858834	1789548	1677808	1606736
1.01	258.074	259.082	[M+H]+	ION=[M+H]+	67588	39062	68222	82274	76936	86336	76422	72676	73844	64968	35138	34116	45528	60778	60198	74016	76414	77120	72366	69654	68380
1.01	359.143	360.15	[M+H]+	ION=[M+H]+	454258	246598	466444	575818	519122	557668	533556	463906	501874	427818	201544	192268	294750	416964	435952	493550	527616	516088	465868	438778	422166
1.01	701.26	702.267	[M+H]+	ION=[M+H]+	104922	59898	106642	134634	127424	140326	132716	117434	121814	103268	45990	44000	77406	99726	105656	116874	121444	130438	109186	108288	110234
1.02	288.085	289.092	[M+H]+	ION=[M+H]+	89454	61744	89650	111812	103348	118544	103896	98610	105514	91274	55108	57928	68950	83606	85136	98652	109108	103006	93298	91298	89512
1.02	324.106	325.113	[M+H]+, [M-H2O+H]+	ION=[M+H]+	280564	199194	286390	352920	335712	364220	336418	305164	337160	286378	181708	177488	212638	259176	269288	311338	330628	325666	293108	287664	265022
1.02	1043.38	1044.39	[M+H]+	ION=[M+H]+	66618	36716	73022	94504	84656	94118	91750	79998	81652	72798	29882	30388	53916	69334	67750	77644	87360	89436	76320	71908	74518
1.03	133.073	134.081	[M+H]+	ION=[M+H]+	127912	39794	115292	95876	125554	98030	119462	116956		119532	46396	45482	108422	213798	222146	262964	176826	193808	78098	71282	76948
1.03	161.069	162.076	[M+H]+, [M-H2O+H]+	ION=[M+H]+	68536	27336	58016	127020	66894	98968	60500	53186	40394	65490	29944	73896	32822	46194	66534	97532	66554	58156	55714	34990	48668
1.03	2186.72	1092.35	[M-H-H]2-	ION=[M-H-H]2-	19286	23290	21668	24704	21596	30418	23212	25166	21456	17608	26254	25716	23640	23000	22908	22312	25338	26716	22336	30906
1.04	108.021	109.029	[M+H]+	ION=[M+H]+	40444	53388	41760	73306	70622	69196	58882	58592	60690	54786	53532	52394	51782	41212	43358	53866	62344	61806	59346	60638	59088
1.04	476.138	475.13	[M-H]-	ION=[M-H]-	403210	372384	386784	339664	366550	393330	294296	311846	287094	338190	385946	389908	409856	423318	393922	322242	350422	311202	320390	444956	449068
1.05	117.079	118.086	[M+H]+	ION=[M+H]+	534450	46506	495466	836122	973238	69384	720962	717316	813334	619852	147098	172476	434680	898066	740970	895664	596034	665766	899482	1184978	1307458
1.05	125.084	126.091	[M+H]+	ION=[M+H]+	9792	5132	12256	25846	28156	25012	29706	17982	21062	6090	2422	3190	17178	26920	23016	28982	25334	21162	8000	7692	10142
1.05	134.022	133.014	[M-H]-	ION=[M-H]-	147134	137314	176704	149866	153426	167430	114842	139374	106232	128084	152204	159280	183420	187866	166434	126898	137714	136220	148400	195934	194022
1.05	176.032	175.025	[M-H]-	ION=[M-H]-				23528	30046	18870	16896	11754	12810	9564	470		7050	17908	13390	5734	20212	21408	5832	5182	6522
1.05	178.041	179.049	[M+H]+	ION=[M+H]+	48066	1190	44118	38158	41256	43296	37484	48438	41504	39028	1104		21384	53044	44712	40014	41680	43124	29928	29516	29610
1.05	188.117	189.124	[M+H]+	ION=[M+H]+	7598	3934	10388	21418	23844	23918	26410	12940	16372	6238	1442	2648	12982	21032	21214	23984	19158	19032	6002	6770	8420
1.05	279.132	262.128	[M-H2O+H]+, [M+H]+	ION=[M-H2O+H]+	4172	2958	6270	29350	25110	5564	13810	46362	46810	7804	1518		10816	10202	34650	17922	11186	18326	68448	46244	89562
1.05	277.115	278.123	[M+H]+	ION=[M+H]+	3268	2046		9406	10428			22196	13668		1330	4364	6872	5378	22112	6714	5482	9622	21920	16404	19300
1.05	307.085	308.092	[M+H]+	ION=[M+H]+	125590		118174	88550	90234	115070	96612	118680	97066	104094			54090	144222	119080	102160	108294	101586	75392	74038	72526
1.05	459.195	460.203	[M+H]+	ION=[M+H]+	103588	11634	93220	160976	189002	132554	141738	146498	147526	101928		10668	63808	176718	142580	166918	113882	127344	165954	224692	265556
1.06	113.084	114.091	[M+H]+	ION=[M+H]+	10076	5518	8072	12168	18296	9424	12992	10680	12248	19776	7196	8900	8470	11184	8722	8034	7924	7730	11724	16826	13892
1.06	129.077	130.085	[M+H]+	ION=[M+H]+		4640		28588			79492	54010	39358	49454	9672	9674	18596
1.06	133.037	134.045	[M+H]+	ION=[M+H]+	57450	192380	39266	97266	83060	74872	58874	80688	66074					65838		49932	62666	69726	81978	63678	64842
1.06	135.055	136.062	[M+H]+	ION=[M+H]+	49550	52854	60830	86688	59512	52674	40576	134718	86730	74842	27684	22250	43594	52962	74606	52324	39962	67724	266474	30776	58082
1.06	347.063	348.071	[M+H]+	ION=[M+H]+	57916	32388	59852	30630	50880	41850	24276	27592	28118	61098	20672	35918	69172	63972	55706	43396	55994	30864	28340	45942	39144
1.06	666.153	665.145	[M-H]-	ION=[M-H]-	36266	24794	32686	15248	24550	24702	14506	17304	15746	37946	27280	41600	47816	40866	39798	31982	29840	21458	17602	16944	15970
1.06	1008.27	1007.26	[M-H]-	ION=[M-H]-	28304	18374	26212	13130	23340	17694	12760	16556	12792	28446	23968	38342	39204	35328	34756	26962	26372	17668	13198	16350	13768
1.07	324.036	323.029	[M-H]-, [M+H]+	ION=[M-H]-	39384	26876	30198	14682	22508	17846	14734	12652	12302	40656	28410	40780	42312	37270	39648	29840	27264	15994	14076	15000	12746
1.08	103.048	104.055	[M+H]+	ION=[M+H]+	119018		115912	70388	109358	96120	103768	120414	96042					271736	246056	81742	129080	126344		73382
1.08	491.171	492.178	[M+H]+	ION=[M+H]+	33472		31348	26514	51974	33754	35588	38886	34028	10816				66306	55134	26812	41772	38490	20372	24760	20104
1.09	192.027	191.02	[M-H]-	ION=[M-H]-	357940	530516	750410	562130	704820	672296	602888	867254	851548	74244	596862	700906	637260	705788	618602	718550	716706	606444	587372	586370	582462
1.09	534.144	533.137	[M-H]-	ION=[M-H]-	11760	29040	43212	31194	44414	44582	38404	46516	56250		38084	40950	37542	40908	34296	40772	47674	38718	33572	37868	36488
1.11	122.039	123.047	[M+H]+	ION=[M+H]+	7576		7010	17076	18470	15660	25380	24982	28386					16982	10528	15480	11658	12840	26298	29590	40712
1.11	132.025	133.032	[M+H]+	ION=[M+H]+	96020		96922	61524	128854	75904	83960	102158	85084	51326				220330	195798	68502	110590	102968	39206	57902
1.11	174.016	173.009	[M-H]-	ION=[M-H]-	4112		23148	61206	73100	37434	48332	118724	61728		21194	29816	39598	36692	37250	65618	44998	73082	136442	175096	130858
1.11	523.19	524.197	[M+H]+	ION=[M+H]+	11396		10614	37474	44542	31348	54626	61402	62834	3860		2194	3316	25680	14546	26880	22708	27066	51476	62040	93148
1.12	149.051	150.059	[M+H]+	ION=[M+H]+	283898	844	284878	213240	419044	265334	293944	328382	306990	120584			92648	574182	512640	210710	345436	351862	144390	185216	144418
1.12	181.074	182.081	[M+H]+	ION=[M+H]+	41102		32528	132394	143176	101730	175654	207492	209668					92030	51004		73294	93474	187280	217990	339776
1.12	813.276	812.269	[M-H]-	ION=[M-H]-			4496	14508	38380	16976	38468	38032	24876		4052	8400	17964	16926	11748	11126	14808	34072	29654	34090	42172
1.13	135.066	136.074	[M+H]+	ION=[M+H]+	21744		21074		58734	50940	72070		89106					49268		44750	34834	44346		91144	138528
1.13	706.215	707.222	[M+H]+	ION=[M+H]+	16646	24866	14504	24404	24494	24028	24334	23384	25538	15940	26336	26702	19116	16984	14822	21092	23418	23238	22922	24090	23820
1.14	101.048	102.055	[M+H]+	ION=[M+H]+	54400				84148	58686							21876	108388							58836
1.14	364.098	365.106	[M+H]+	ION=[M+H]+	105180	141162	101176	137518	135498	138842	134788	126232	133868	100508	147328	147708	96890	98030	88786	124602	131616	133394	120206	128790	125700
1.14	471.159	470.151	[M-H]-	ION=[M-H]-		4124	12308	17274	44920	18552	45640	46784	34002		10454	23252	30486	31012	25386	18632	28116	41480	52320	51944	53112
1.17	440.088	439.081	[M-H]-	ION=[M-H]-				31364	37210	30572	27634	46658	38280					34620		30298	27724	28046	38968	36236	30576
1.21	202.045	203.052	[M+H]+	ION=[M+H]+	14750	30948	17316						17632	18618	31504	23472	16268							24128
1.32	131.095	132.102	[M+H]+	ION=[M+H]+	41740		23848	126720	116120	94926	71534	96314	104264			852		39650		95640	73864	92046	105378	129038	166064
1.42	202.045	203.053	[M+H]+	ION=[M+H]+				15838	13414	15690	22800	21046	22364	14902				14930	14786	22188	21070	20864	26318		18998
1.43	117.079	118.086	[M+H]+	ION=[M+H]+	70844		54096	108668	155108	81420	84624	105076	99162	135398				123502	92112	104302	73884	84238	133640	201200	232958
1.47	324.036	323.028	[M-H]-	ION=[M-H]-		18330	22546	17382	38566	30488	20682	30068	26422		23818	38296	45034	49878	38898	37590	35994	27484	17928	29328	26060
1.48	176.032	175.024	[M-H]-	ION=[M-H]-		548		32106	32236	25924	20066	16334	16656				10310	25152	17138	8548	26782	25620	6730	6894	14850
1.49	178.041	179.048	[M+H]+	ION=[M+H]+	80574	33774	67946	66278	78074	70368	76056	105192	81820	73706	29136	18786	60060	88652	64876	59418	75098	92198	57784	72142	70900
1.49	307.084	308.091	[M+H]+, [M-H]-	ION=[M+H]+	168196	69962	147642	127674	167168	140542	157390	195400	161418	142092	51284	38842	114496	176604	138056	122106	152790	180534	121692	142338	140694
1.49	347.063	346.055	[M-H]-	ION=[M-H]-	27838	22486	24238	16300	32750	28748	14556	20248	18118	28330	16392	36042	41204	37786	29118	21940	31682	18156	17202	32804	29780
1.49	347.063	348.071	[M+H]+	ION=[M+H]+	72884	25690	67654	49068	102616	56644	45912	54902	54344	62726	15780	31834	61910	81070	67472	61616	81466	60972	52692	86948	80924
1.5	101.049	102.055	[M+H]+, [M+Na]+	ION=[M+H]+	54410	10562	46384	31728	67686	41292	48372	60948	51582	31614	11722	16088	67634	105242	86842	32024	51776	67282	26734	38148	26406
1.5	103.046	104.053	[M+H]+	ION=[M+H]+	274274	59062	244694	174864	354674	217772	250416	317858	266158	161542	62118	83172	367672	574624	446534	165882	285896	345682	131742	200152	139150
1.5	125.084	126.091	[M+H]+	ION=[M+H]+	5692		8110	15210	21996	18326	22154	10374	11346	2012		522	8322	18526	12936	18568	17500	13760	3472	5762	7788
1.5	129.079	130.086	[M+H]+	ION=[M+H]+	5136		3680	13210	14668	4878		31506	19728	9310			2890	9140	6060	6622	6130	6664	15420	25482	27542
1.5	132.025	133.032	[M+H]+	ION=[M+H]+	217980	43198	190568	133172	279160	160600	191120	237450	201874	122020	45920	65090	275948	427696	338230	129154	216358	254880	102584	158680	109314
1.5	135.055	136.062	[M+H]+	ION=[M+H]+	63184	43846	76840	165566	107744	78650	64620	289860	157298	89170	21456	16992	41682	79884	100902	77774	57168	130234	473154	59524	130280
1.5	149.051	150.058	[M+H]+	ION=[M+H]+	306356	46960	271240	200774	389318	248440	272144	314046	285234	163368	49502	68188	312078	504092	413922	193236	307994	349100	141456	231474	159194
1.5	279.132	262.128	[M-H2O+H]+, [M+H]+	ION=[M-H2O+H]+	5590		5834	33112	32062	6926	17234	52872	51146	5218		418	8254	11636	35010	19712	13540	23032	76146	74984	121502
1.51	122.047	123.054	[M+H]+	ION=[M+H]+	66286	16744	53914	52116	53094	61098	32816	34556	37734	34136	13990	18800	26748	47428	47472	43582	40550	38034	51844	52776	62716
1.52	192.027	191.02	[M-H]-, [M+Na]+, [M-H2O+H]+, [M-H-H2O]-	ION=[M-H]-	510070	446524	499636	370760	500426	453872	412194	611810	628664	564718	452800	498124	498116	555518	495576	466946	505534	469618	410244	434882	484290
1.52	293.093	294.101	[M+H]+	ION=[M+H]+	3922	1934	3086	10754	16220	3904	8868	29894	22980	2600	1042	6008	10914	9914	35548	5098	8002	12648	15942	11990	11022
1.53	406.036	405.028	[M-H]-	ION=[M-H]-	23730	18612	19630	11106	20068	19846	15806	21710	25706	28904	18756	20462	17128	19724	18220	20388	22448	15516	15808	16708	16436
1.54	128.011	129.018	[M+H]+, [M-H2O+H]+	ION=[M+H]+	77640	27584	58574	42538	55430	47540	43438	62926	72744	67290	22160	25586	36208	47190	42716	49964	51132	55422	41040	53674	42526
1.54	275.991	139.003	[M+H+H]2+	ION=[M+H+H]2+			41440						42906				23904			31152
1.54	137.996	139.003	[M+H]+	ION=[M+H]+	48680	18542		27732	32436	30670	30652	42104		41974	15562	18458		28732	26764		32802	33918	28494	32186	26488
1.54	146.022	147.029	[M+H]+	ION=[M+H]+	31942	12286		20908	33686	24626	23536	33138	31616	28242	7596	9156	13748	20870	22910	27636	33422	20854	21634	25812	27536
1.55	156.006	157.013	[M+H]+	ION=[M+H]+	22172	8856	18400	15930	20094	15772	15448	20446	22326	18700	6540	7408	10782	12742	11558	17014	20946	14820	14358	18180	18426
1.59	131.095	132.102	[M+H]+	ION=[M+H]+	30028		27786	81366	88578	61132	61402	79598	98778	632		838		42244	48764	61324	50036	76150	60332		109414
1.6	129.043	130.05	[M+H]+	ION=[M+H]+	104194	19302	53972	55664	131902	48114	97144	118116	78212	111284	17884	39746	95422	88224	95340	50876	91382	102606	115014	167358	156658
1.71	174.017	173.009	[M-H]-	ION=[M-H]-	5622	4680	8864	21552		12566	14580		17658	10606	6404	8138	13686	16470	15662	19740	12970		49084	67442
1.85	112.027	113.034	[M+H]+	ION=[M+H]+	21154	16360	24262	40466	35808	23696	43146	60802	33928	40286	20566	9516	13052	14802	28018	15410	14474	27162	70256	23668	34684
1.88	131.095	132.102	[M+H]+	ION=[M+H]+		44904								138178	39780	35830	141510		219914
1.91	370.014	369.007	[M-H]-	ION=[M-H]-				15214	21172	5010	8752	35668	12848					14786		15394		21604	40158	49882	41344
1.92	195.998	197.006	[M+H]+	ION=[M+H]+	10180		8144	19282	18398	6962	10430	31912	14480					11354		18898	18616	20636	39872	51188	37396
1.94	293.147	294.155	[M+H]+	ION=[M+H]+	1566	522	1064	10236	9706	2062	4624	19618	16926	798	530	1310	1156	2920		4852	4870	8514	20298	18472	31504
1.95	110.001	111.008	[M+H]+	ION=[M+H]+	13970		16920	45850	50798	12726	30184	83254	41278					26648	32964	30586	40228	38104	93714	151730	103512
1.95	137.995	139.003	[M+H]+	ION=[M+H]+	15608		19148	56694	61624	15086	30798	104526	44546					30272	38754	37668	51684		113460	187306	134228
1.96	130.027	129.019	[M-H]-	ION=[M-H]-			27280	58180	70938	29956	47390	131206	62296		16622	36192	61776	59366	58484	64100	56426	86328	148572	214110	167618
1.96	174.016	173.009	[M-H]-	ION=[M-H]-			62274	138314	162808	73034	97854	310266	138794		40286	76278	136188	136246	119884	149226	130448	200264	328688	502076	390946
1.98	275.137	276.144	[M+H]+	ION=[M+H]+	2718		2354	26618	22308	3894	12578	51958	43928	1676		1768	2586	5834	23982	11596	11570	18692	53952	46572	79520
2	131.095	132.102	[M+H]+	ION=[M+H]+	174980	54038	168918	463688	575926	313644	365360	563666	378956	197288	52576	57526	150480	303666	288458	323336	384842	411564	436034	637838	648250
2.02	118.042	119.049	[M+H]+	ION=[M+H]+	6172	4478	7562	18398	25864	12882	25030	39348	27010	11104	5048	4062	15128	16952	20754	13402	11784	15134	31950	43534	58602
2.02	122.041	123.048	[M+H]+	ION=[M+H]+	10444	8676	11890	30758	39984	24436	42026	55180	48086	16148	7726	7382	24016	28760	35132	20752	19152	23282	50424	70008	91266
2.02	135.068	136.075	[M+H]+	ION=[M+H]+	28054	21158	34644	96814	122426	71822	129968	179974	145450	50986	20994	21392	76174	92222	105352	62554	56194	73816	159794	227460	305908
2.02	146.037	147.044	[M+H]+	ION=[M+H]+	6022	3234	5376	14950	20556	10534	20868	27354	19858	7976	3446	3624	10846	14320	15694	10030	9932	11218	24212	33264	41976
2.02	164.041	165.048	[M+H]+	ION=[M+H]+	27868	20414	30332	79528	100684	59764	97330	146900	111120	42772		19312	63556	70102	77912	53876	48948	59610	126326	179992	244158
2.02	181.074	182.081	[M+H]+	ION=[M+H]+	22632	12386	29100	75362	94200	51860	93892	132848	102306	31548	14122	13634	47230	72072	78004	50258	47134	54958	122894	163796	220076
2.03	181.073	180.066	[M-H]-	ION=[M-H]-	10954	11860	9716	20612	26432	24652	38234	32856	34748	15002	11398	9758	23348	27294	22526	13954	11186	16140	22492	21684	62242
2.12	174.016	173.009	[M-H]-	ION=[M-H]-	29998	41940
2.28	274.103	275.11	[M+H]+	ION=[M+H]+	17320	9596	16114	9242	9004	7280	15968	16848	17720	18424	5786	6386	23962	19816	13776	44412	22990	27550	21744	37822	25692
2.32	130.027	129.019	[M-H]-	ION=[M-H]-	44802	39270	36286	69674	86834	33836	53644	141574	71790	69524	30590	49514	80000	72126	80358	87056	74612	104816	174034	241232	180556
2.32	156.006	139.003	[M-H2O+H]+, [M+H]+	ION=[M-H2O+H]+	37752	20204	37504	74128	70008	27424	51380	142856	51736	64072	11746	20026	58038	49962	63656	76116	71574	94904	165166		170620
2.32	174.016	173.009	[M-H]-	ION=[M-H]-	110834	93956	90316	159474	195240	82324	124736	334994	169208	168552	65332	118856	187800	156610	179704	207162	183234	232314	386148	569704	420388
2.32	195.998	197.005	[M+H]+	ION=[M+H]+	17040	8484	13766	30204	33784	10006	17886	53308	21624	32306	5118	9320	34792	22124	28032	40088	39718	46596	69082	195924	101680
2.32	370.014	369.007	[M-H]-	ION=[M-H]-	12314	7590	7940	19078	23854	5410	12544	35946	18150	17992	4634	11606	21300	17162	19278	22688	21090	28722	41082	60618	48808
2.32	401.953	402.96	[M+H]+	ION=[M+H]+	6738	4788	6630	14654	13240	4636	9632	29474	9618	12322	2000	4088	13892	9644	12420	14228	15418	19542	31028	52100	32540
2.33	110.001	111.008	[M+H]+	ION=[M+H]+	32946	19354	31954	58874	57092	23294	42338	116550	46548	52700	10826	18652	47574	45484	52296	63664	58890	78040	132998	230042	142264
2.34	267.096	268.104	[M+H]+	ION=[M+H]+	116064	64734	119192	174290	202144	117010	200110	316230	180272	172344	45328	47476	65180	113284	165836	102906	95424	164634	347798	240634	239874
2.35	135.055	136.062	[M+H]+	ION=[M+H]+	89998	62654	106476	143104	163190	104000	174486	279146	151782	148938	43512	38798	49330	88562	126372	77150	74736	121954	295026	214536	201928
3.77	119.074	120.081	[M+H]+	ION=[M+H]+	74688	31488	76920	232824	284904	199470	119304	214086	166270	117098	32562	28038	111168	178694	159218	130144	114938	166292	294294	575780	559562
3.77	165.079	166.086	[M+H]+	ION=[M+H]+	20170	7080	20578	58214	78474	53430	31598	57472	41714	32212	10336	8538	30660	46938	40108	34232	31620	44184	80362	155490	149250
5.26	144.042	143.035	[M-H]-	ION=[M-H]-	7342	6186	5754	8396	8900	3794	6464	16430	8844	11038	4308	5956	6402	5370	6358	9278	7432	11434	20228	27988	21664
5.27	137.995	139.003	[M+H]+	ION=[M+H]+	8794	3060	6868	10918	11664	4498	8848	23502	10346	11994	1902	3244	3958	5846	6080	11098	9270	14022	25924	43886	28198
8.4	145.053	146.06	[M+H]+	ION=[M+H]+	12214	3730	11712	25066	27412	16998	17674	22980	18184	6266	2056	1592	5196	10026	10758	17946	13800	18572	33938	42884	41592
8.41	204.09	205.097	[M+H]+	ION=[M+H]+	14452	3644	12728	30060	29674	19438	22506	26712	21786	7282	1804	2058	5542	11900	12552	22162	19152	26182	42888	49836	51948
8.42	187.063	188.07	[M+H]+	ION=[M+H]+	59840	14440	56954	128322	132778	84904	95474	117256	98096	28444	7112	6194	28068	51664	57664	93626	70906	97290	181664	214472	216338
9.04	352.077	353.085	[M+H]+	ION=[M+H]+	9842	2866	8518	11386	11076	8912	35828	33444	32868	20980	4674	4152	11258	16744	20558	16536	24804	23508	14172	11976	10004
9.16	135.055	136.062	[M+H]+	ION=[M+H]+	138362	24188	143534	96176	127978	96212	113180	130442	136794	94626	23152	32508	40946	106256	115978	139944	119160	108592	106766	111342	108924
9.16	297.089	298.097	[M+H]+	ION=[M+H]+	108162	18214	102934	69526	94458	73934	77422	97822	104368	73632	18902	23636	31232	80704	86050	102518	92006	78658	80254	76622	78278
9.25	264.147	265.154	[M+H]+	ION=[M+H]+	12646	2324	7506	28118	21090	27522	15340	9264	8380	3834	1838	2066	9810	20398	23250	15456	30460	29344	22128	23948	23176
9.34	129.058	130.065	[M+H]+	ION=[M+H]+	18602	4560	18326	27924	26442	35356	28398	21764	27608	13952	3738	4200	9898	26210	28686	14718	19866	18274	24460	15690	27478
9.34	359.098	360.106	[M+H]+	ION=[M+H]+	17082	4790	16970	24938	23492	29648	27730	19664	23522	14194		4624	9812	22804	23722	14570	17324	17296	22068	16094	25472
9.87	207.053	208.06	[M+H]+	ION=[M+H]+	93270	29834	69756	245948	163682	182720	134910	143944	189796	72918	16656	14688	46472	146714	149906	64624	86298	92236	147714	153514	182090
9.87	437.093	436.086	[M-H]-	ION=[M-H]-	11910		13096	27708	21664	26152	21958	22754	27098	12286	11658	12554	16374	21280	22892	14412	14052	15358	19414	21758	25084
9.88	161.047	162.054	[M+H]+	ION=[M+H]+	12914	3576	9422	34936	24246	24042	19734	21082	27980	9242	2782	2052	6302	20058	20846	9164	13610	13258	21580	20666	26774
9.88	369.106	370.113	[M+H]+, [M-H]-	ION=[M+H]+	129954	37514	97108	373848	241628	268854	200688	216354	289672	95758	20212	16288	59422	213806	221966	91942	124560	131224	217108	207728	272138
9.88	738.212	737.204	[M-H]-	ION=[M-H]-	4496	6726	3546	31440	17502	27358	9294	14906	22914	4180	3798	3422	10942	21382	21660	4210	4124	5972	11576	12498	21914
9.88	760.195	761.202	[M+H]+	ION=[M+H]+	17850	2964		39682	34168	34514	27268	30506	32102	13360	900	850		28606	28550	14300	19008	19156	27672	28274	32472
9.94	391.088	392.095	[M+H]+	ION=[M+H]+	51978	26672	44278	85792	77722	75178	67642	67694	74842	54216	13622	13192	38206	64306	65878	43012	51226	56264	71676	69714	73510
10.64	207.052	206.045	[M-H]-	ION=[M-H]-	5618	13668	8934	22114	8568	22600	9192	12850	11068	6808	7520	5366	7916	10936	13524	5008	7322	10340	21818	6602	12986
10.82	545.174	544.167	[M-H]-	ION=[M-H]-	14040	14582	15052	126132	120150	200302	76638	63352	69738	22542	19960	27692	80444	107322	78862	15420	51224	45964	25288	42818	49114
10.83	350.125	176.07	[M+H+H]2+	ION=[M+H+H]2+				52886	45824		28376							33752
10.83	337.116	338.124	[M+H]+	ION=[M+H]+	16422	2868	12860	107514	104736	122014	59354	54406	56796	19174	3368	3920	22260	71152	57490	13986	41092	37958	22346	32152	43884
10.83	521.151	522.159	[M+H]+	ION=[M+H]+	27630		23044	120802	115558	118534	83914	76190	74976	34216	7008	8598	44688	89344	72822	22432	67636	59986	38448	53046	65940
10.83	1020.32	1021.33	[M+H]+	ION=[M+H]+	1062			31026	29346	33182	12432	10886	11052	1416				824			7048	6082	2478	4140	6840
10.84	175.063	176.07	[M+H]+	ION=[M+H]+	7642		5170			54290		25226	24970	7980		2096	10718		26020	5996	18390	16938	9570	14526	19824
10.85	129.058	130.065	[M+H]+	ION=[M+H]+	33336	6074	25844	197618	183224	209602	114024	95934	105518	33778	6622	8228	43110	126058	101562	26910	73608	69268	44818	62820	95126
10.9	359.098	360.106	[M+H]+	ION=[M+H]+	13696	3352	10656	12566	10362	19204	21162	11442	17690	11046	2466	2982	9660	20228	23470	10130	13756	10392	15246	19192	23112
11	176.047	177.054	[M+H]+	ION=[M+H]+		19384	41594	28696	20454	24962	125292	137322	111202	11134	5026	4448	18846	49514	44874	65614	67360	81518	88546	65362	53658
11	264.147	265.154	[M+H]+, [M+Na]+	ION=[M+H]+	64674	38466	78938	54492	38934	49140	240702	267496	217540	15972	9746	6630	36912	99172	88400	133832	125268	155102	177166	131468	99116
11.01	144.021	145.028	[M+H]+	ION=[M+H]+	5850	3970	7938	5806	4954	4912	22898	25494	20292	2702			3594	10062	7782	13490	12212	15716	14608	11852	10120
11.44	354.093	353.086	[M-H]-	ION=[M-H]-	654	1276	902	2898	7912	2202	8952	11234	6750	1852	1300	1440	1240	680	1968	620	1456	1856	7350	25962	13096
11.45	162.032	163.039	[M+H]+	ION=[M+H]+	2484	1318	1838	7614	27120	4916	30596	33522	20900	6778	1422	1396		2436	4098	2554	5002	6300	26934	88244	48082
11.45	376.078	377.085	[M+H]+	ION=[M+H]+	784		790	3538	11372	2056	11438	14384	9024	2304			308	804	1314	686	1838	2036	10736	33384	19386
11.53	176.047	177.054	[M+H]+	ION=[M+H]+	4708	2432	3598	19964	18274	8624	12424	17966	18276	29880	7996	4026	1954	3682	3080	9072	40590	40210	23272	22140	17512
11.83	515.161	514.154	[M-H]-	ION=[M-H]-	24294	24534	25992	20924	17582	32370	20764	16428	19346	10602	18784	18294	23256	25150	22414	21452	17886	13366	30004	38702	58710
11.84	129.058	130.065	[M+H]+	ION=[M+H]+	21828	4956	15014	14720	12416	19960	15750	11662	13336	7494	2828	1994	5066	15220	15396	14270	15302	12300	20572	29672	37804
11.85	491.141	492.148	[M+H]+	ION=[M+H]+	32968		25836	26662	20452	29194	25070	18468	21806	14412	5736	4194	9962	23092	22524	24048	22476	20228	34760	43188	52894
12.24	356.111	355.104	[M-H]-	ION=[M-H]-	514	1348	516	5102	8654	4222	30912	44962	38260	15956	16186	9148	11678	10576	11668	12298	4636	7080	30162	5534	6648
12.25	515.164	514.156	[M-H]-	ION=[M-H]-	59830	59290	65072	155286	120418	192254	87186	79326	81056	49348	76858	68064	95316	128518	114664	71784	81432	73136	111696	156076	202110
12.26	337.116	338.124	[M+H]+	ION=[M+H]+	44072	9192	32032	81428	68130	80288	47134	39392	42998	26030	7136	5616	17974	59638	49852	40574	46306	39994	61004	84660	99894
12.26	379.125	380.132	[M+H]+	ION=[M+H]+	35030	6450	23730	71388	54910	67046	40696	35762	38512	23370	6388	4980	16950	44786	39540	34694	41296	35142	56062	67206	80988
12.26	469.157	468.15	[M-H]-	ION=[M-H]-	14576	13538	13710	34232	27086	44168	19162	17100	17730	11216	17560	13414	22358	27146	22388	16750	19212	16244	24446	38278	48984
12.26	469.158	492.148	[M+Na]+, [M+H]+	ION=[M+Na]+	66488	21056	52006	91188	83932	93992	63398	51728	54368	40360	17854	14612	37338	70126	63476	60324	69934	63122	74462	94176	99692
12.26	960.301	961.308	[M+H]+	ION=[M+H]+	22878		13648	44926	36176	44382	14814	11378	13244	7230				27400	22134	14692	24386	18330	21656	46718	52286
12.27	129.058	130.065	[M+H]+	ION=[M+H]+	44752	8570	30344	78410	64726	78062	43324	40710	42388	24678	7260	5636	17822	51722	45352	39874	45254	38506	61034	82310	98862
12.27	175.063	176.07	[M+H]+	ION=[M+H]+	11114	2410	8234	20332	18116	21710	12684	10378	10792	6408	1792		4694	14634	13616	9558	11876	10340	15936	21638	28600
12.27	486.185	487.192	[M+H]+	ION=[M+H]+	19580	3772	16392	40790	32630	41218	24940	21106	21672	13696	4038	2490	9308	25972	21914	22164	23298	21100	29226	38326	44846
12.28	176.047	177.054	[M+H]+	ION=[M+H]+	1316		1742	8424	9612	4070	40282	57758	55922	20506	4334	2180	5936	13332	12192	14130	6428	8296	42082	8580	9002
12.51	373.101	372.093	[M-H]-	ION=[M-H]-	23194	22006	22134	40822	45930	57184	21486	14522	19556	33754	39056	40386	7388	10004	8476	12396	21908	27308	57962	22748	58828
12.51	419.106	418.099	[M-H]-	ION=[M-H]-	44340	44208	44168	82474	90632	121906	45766	27772	34688	65406	78002	80438	16088	22676	21990	24380	47154	49132	102156	38474	106328
12.52	165.043	166.05	[M+H]+	ION=[M+H]+	81044	14264		112712	119168	125468	50514	34138	48076	90224	18028	17428	5844	22796	24646	34668	65488	62716	148124	53706	137346
12.52	211.048	212.056	[M+H]+, [M-H2O+H]+	ION=[M+H]+	74624	13600	49006	104470	113480	120716	50766	33578	46190	81402	18124	18606		20720	21720	34492	58516	59800	142402	50914	129580
12.52	373.101	396.09	[M+Na]+, [M+H]+	ION=[M+Na]+	76378	16196	53064	96994	110188	106220	48854	32912	46988	81194	19488	18724	6878	19562	23484	31536	59138	59614	117006	54232	118488
12.58	386.12	385.113	[M-H]-	ION=[M-H]-	15040	14888	22842	21502	29178	34266	20202	18866	17908	14538	22008	13588	49946	52602	50706	41122	42728	41564	13900	14974	15422
12.59	408.103	409.111	[M+H]+	ION=[M+H]+	59568	21392	68158	67064	82172	75188	61074	56760	56366	47562	22102	14568	55786	87256	82574	90632	101658	93784	49028	55396	50328
12.6	206.058	207.065	[M+H]+	ION=[M+H]+	24412	4870	31540	29438	42358	33412	27724	23394	24276	18392	5432	3436	22352	63784	62272	51874	68892	60174	17696	21078	17174
12.77	191.058	190.05	[M-H]-	ION=[M-H]-	6732	14738	11172	69550	29186	72206	20952	21270	35758	7444	9506	7146	13186	23568	18356	14590	22440	26756	27834	26838	27868
12.79	145.053	146.06	[M+H]+	ION=[M+H]+	24988	9370	27020	205760	77792	146368	52986	54006	84244	17846	4730	3500	10676	46368	40316	39234	61166	69736	78776	70486	65632
12.79	173.043	174.051	[M+H]+	ION=[M+H]+	9542	4622	8982	58452	23244	42096	17744	16870	23614	7418	3440	4100	5470	12726	12852	11900	19524		23890	23354	21446
13.25	165.043	164.035	[M-H]-	ION=[M-H]-	11456	13520	10870	9280	12390	8858	5086	6348	3712	14944	19778	15264	1460	1332	2546	3680	8242	10814	60430	26980	35436
13.27	193.038	194.045	[M+H]+	ION=[M+H]+	13680	3448	7110	7924	9694	6554	3850	4100	3230	10854	2734	2112	588	1132	1156	2506	6542	8050	53486	22716	25734
15.13	1312.76	438.594	[M+H+H2]3+	ION=[M+H+H2]3+	4624	2040	2786	7108	5284	4492	15408	27250	19362	3354	2024		6118	21624	23644	7348	12648	12666	4424	1080	1854
15.17	436.134	437.141	[M+H]+	ION=[M+H]+	1288		792	2412	5278	2726	30530	22182	25104	1878		546		7734	5138	2816	3730	3568	2046	5226	3568
15.45	352.093	177.054	[M+H+H]2+	ION=[M+H+H]2+									33416												35608
15.46	176.047	177.054	[M+H]+	ION=[M+H]+	2410	2298	2618	15432	17408	6094	14064	57444		11532		2572	1740	3404	7638	8538	8036	14522	77168	51100
15.69	206.058	207.065	[M+H]+	ION=[M+H]+	15178		19028	19238	25878	17916	5822	16086	11050	11062		2538	4100	8172	16780	25528	24320	37444	37148	33260	27126
15.95	165.043	166.05	[M+H]+	ION=[M+H]+	6548		5124	7318	8266	4690	2136	4696	3032	6852		2952	846	780	1628	2424	4214	5908	38472	21816	24474
16.96	1136.62	569.32	[M+H+H]2+	ION=[M+H+H]2+	7794		8216	23544	18674	12644	6734	31280	14812	9522		1238	3992	9406	18534	9702	6542	19888	44436	12736	16836
17.23	129.058	130.065	[M+H]+	ION=[M+H]+	3130		4190	30856	17446	19356	12464	40700	22486	5432			1656	5636	7954	6028	4946	12176	55672	3624	15590
17.82	368.017	367.01	[M-H]-	ION=[M-H]-	14714	16112	19838	22260	20504	27154	19930	20358	19088	12072	17048	16412	19412	21762	19794	17626	18290	20020	22902	20194	19606
17.86	322.012	345.001	[M+Na]+, [M-H2O+H]+	ION=[M+Na]+	22354		18748	25870	25046	23726	21532	22472	20774	10850			7500	20798	16336	24092	22578	22964	27006	22334	25102
19	344.182	343.175	[M-H]-	ION=[M-H]-	14838	13616	22902	17826	19724	31510	5962	4886	5330	9686	18254	16688	11058	10612	10826	20262	20756	22882	10552	5278	9060
19.04	366.166	367.173	[M+H]+	ION=[M+H]+	32554		27836	25022	28416	30106	7226	4768	5720	14898			4098	14482	12814	27950	30538	28258	13650	7664	11728
19.05	194.13	195.137	[M+H]+	ION=[M+H]+	24064		21040	18390	20688	24504	5964	4858	6122	11380			3480	10390	9766	24434	24750	25254	10612	6542	10522
19.42	440.194	463.184	[M+Na]+, [M+H]+	ION=[M+Na]+	36484		22028	57298	47530	60996	2506	2608	664	1572			5806	17688	10460	16526	22446	31450	22496	8486	17870
19.72	440.195	463.184	[M+Na]+, [M+H]+	ION=[M+Na]+	62758	35426	65606	51548	53712	58444	17092	22678	7842	10940			36432	65508	49466	78046	75022	94824	63574	22634	35976
20.37	380.247	381.254	[M+H]+	ION=[M+H]+	9576		3536	86188	132170	155256	9788	23910	10752	11626			17190	88752	22820	20140	102472	37428	60884	101404	56894
20.42	457.266	456.259	[M-H]-	ION=[M-H]-	21222	19894	21978	22852	28464	33426	11292	11158	10330	13380	25612	14634	8404	9832	9804	19696	15898	18504	4512	5452	7420
20.44	325.225	326.233	[M+H]+, [M-H2O+H]+	ION=[M+H]+	59692		41280	43924	53828	53314	22380	18376	20318	31214			4532	15670	15132	40776	33678	33070	11080	12028	15654
20.44	479.249	480.256	[M+H]+	ION=[M+H]+	24796		16842	17848	23624	22288	9804	8056	8142	12794			1904	6976	6022	14984	13782	13008	4510	5146	5824
20.88	355.273	356.28	[M+H]+	ION=[M+H]+	37338	35736	37256	41504	41218	42354	39756	38984	38818	39342	37168	38952	36148	37086	36236	39852	41264	41420	40360	39082	41274
20.89	599.288	600.295	[M+H]+	ION=[M+H]+	20182		15948	4670	6812	2400	5462	7294	5270	7108		3434	5434	4598	4920	11266	6784	5716	8714	34574	18316
21.27	414.132	413.125	[M-H]-	ION=[M-H]-			1030	700			2184	3204	1724	1506	5626		1850	2352		37998	7814	31878	14710	3650	886
21.29	436.113	437.121	[M+H]+	ION=[M+H]+	586		916	714	850		3210	5122	1736	2564			928	3514		44690	10200	43172	16976	4546	630
21.29	601.303	602.311	[M+H]+	ION=[M+H]+	27836	5022	26268	4622	8980	3644	6256	7544	5258	18188	2968	7874	7956	6634	7102	20172	15364	10186	7964	37166	22898
21.32	176.047	177.054	[M+H]+	ION=[M+H]+	1796	1152	1752		2020		3762	4340	2294	2556	2410	1074	1154	2946	1584	51332	9544	40242	20916	4136
21.7	273.267	274.275	[M+H]+	ION=[M+H]+	31604	24166	29860	52408	63608	29474	39708	54850	50830	31618	23296	39236	31482	40306	39746	35092	32198	31076	36702	182228	111382
21.79	317.294	318.301	[M+H]+	ION=[M+H]+	11870	2444	8544	28960	32334	13888	18084	25632	22662	9788	2068	11368	8090	14320	12140	12928	10650	11230	13254	121752	62542
21.93	239.226	240.233	[M+H]+	ION=[M+H]+	14854	12404	13396	21644	22454	21772	21482	23260	24568	14950	15098	14986	13040	14572	15426	19334	20514	19862	20586	21676	23136
21.96	222.125	221.118	[M-H]-	ION=[M-H]-	45032	47936	40586	45130	48386	42284	44160	52528	54068	49738	38986	41100	46912	40684	40196	42308	39016	39030	48238	54022	53962
21.98	862.254	861.247	[M-H]-	ION=[M-H]-	12238	19828	9740	18154	5688	12170	18516	27150	12112	10372	16320	6510	10026	8360	6016	20306	10398	14060	15184	6222	6398
21.99	556.159	557.167	[M+H]+	ION=[M+H]+	33586	8518	13686	30384	11102	13520	28730	42978	22838	18284	5064	2204	5534	13130	8844	32276	14740	19926	24036	12660	10030
21.99	884.239	885.246	[M+H]+	ION=[M+H]+	13600		7442	22262	10204	9358	17156	33620	21736	13808	5854	3052		7694		15470	7690	9148	19582	13346	10020
22.02	157.147	158.154	[M+H]+	ION=[M+H]+	48092	63766	46336	66100	66628	59274	60782	66820	67174	53228	65508	68818	57610	48740	48376	53796	52630	49012	65628	74958	72018
22.07	114.104	115.112	[M+H]+	ION=[M+H]+	27170	30632	26370	44258	50054	46856	44534	44926	43966	29962	34128	35718	32290	42750	43520	39984	38970	35490	46348	47828	48386
22.08	248.2	271.189	[M+Na]+, [M+H]+	ION=[M+Na]+	40686	67698	39430	83240	92142	73472	69354	84658	84682	52276	68902	75610	65014	66330	72536	61500	61786	56692	83058	104702	87018
22.09	172.151	173.158	[M+H]+	ION=[M+H]+	15554		10826	25728	28206	24774	23956	26564	23842	18574	18724	19880	18248	25734	24890	22804	23376	20940	25928	28602	25656
22.25	315.278	316.286	[M+H]+	ION=[M+H]+	44182	8696	30142	41602	46752	32682	40112	91796	83946	38004	7890	7738	12170	34542	32060	52418	43378	51860	84198	117152	98838
22.33	458.482	459.489	[M+H]+	ION=[M+H]+	39832	37452	38692	44942	47240	47022	51744	51820	52402	41332	39782	39508	31666	38206	43154	50642	52870	51380	51226	50654	49950
22.74	317.294	318.301	[M+H]+	ION=[M+H]+	70020	17718	49416	245072	160610	112708	71000	149688	128258	73330	15808	19302	35038	83402	82944	114932	97058	142090	211724	266696	191350
22.96	244.072	245.079	[M+H]+	ION=[M+H]+	12044	12554	14136	13278	13288	12844	17642	15664	13250	14920	10430	12886	21426	21278		14302	13962	13674	13280	14108	14108
22.97	148.016	149.024	[M+H]+	ION=[M+H]+	47634	44536	45558	49390	50202	54674	66520	61524	54820	51882	43666	46542	78634	81216	143772	52750	53002	48290	50022	54688	49542
22.97	176.047	177.054	[M+H]+	ION=[M+H]+	28384	23714	27450	31042		32360		35056	30590	30646	24564	24982	43622	51052	86512	31568	31344	31006	30878	35744	29740
23.08	310.178	309.171	[M-H]-	ION=[M-H]-	20262	21460	17484	21938	18834	20840	18862	17986	17920	21494	22514	22528	19468	19196	22644	23820	20650	18328	20708	21814	23682
23.08	310.179	311.186	[M+H]+, [M+Na]+	ION=[M+H]+	37684	40524	40154	43750	43966	41608	45302	42536	42652	40062	44384	40910	38976	37670	40508	42742	42212	44186	42210	44652	43928
23.18	337.261	338.268	[M+H]+	ION=[M+H]+	11656		4892	27310	29056	32158	9220	14150	7310	5914	3000		6468	14624	17546	17326	30978	14488	23398	28694	27340
23.34	301.298	302.305	[M+H]+	ION=[M+H]+	7804		6158	13870	17196	9614	7086	14416	9012	7758	1830	2132	6774	10670	9960	21032	16132	20260	15526	21968	20234
23.37	224.225	225.233	[M+H]+	ION=[M+H]+	36536	35770	35646	36964	37722	37488	33388	35828	34660	37898	34900	35664	34214	35710	34194	37680	36200	36520	35976	35562	34794
23.39	514.545	515.552	[M+H]+	ION=[M+H]+	16800	16104	18340	27870	27272	27592	25758	22422	23340	21430	19032	18716	15968	21434	20190	25062	26532	27972	29012	26936	27950
23.43	337.259	338.266	[M+H]+	ION=[M+H]+	9516		4800	21186	23458	24566	7200	11596	6140	4954	2314		5734	12650	12802	13122	24216	11562	18450	23836	21298
23.61	517.318	518.325	[M+H]+	ION=[M+H]+	15440	3246	12996	24432	26298	20242	26382	36448	34836	11826	4408	4784	7192	17458	23172	31580	29570	30230	33080	29238	36434
23.7	414.205	437.194	[M+Na]+, [M+K]+, [M+H]+	ION=[M+Na]+	48946	34832	41914	67886	66400	74372	53182	58162	45748	47274	35906	34182	40324	59100	53038	58972	59414	67236	65258	68092	62946
23.7	554.311	555.318	[M+H]+	ION=[M+H]+	33048	27154	27898	42928	47816	53548	38812	38586	37094	31108	24486	27760	28360	41112	40088	46032	41708	47376	45480	50172	46992
23.71	236.156	119.085	[M+H+H]2+	ION=[M+H+H]2+	41940									41302			32774
23.71	118.078	119.086	[M+H]+	ION=[M+H]+		26050	34542	55700	63652	76218	48090	51874	44494		27206	25278		58942	52616	62296	58204	63264	61580	62422	65412
23.78	336.229	337.236	[M+H]+	ION=[M+H]+	33642	6110	24950	33306	55800	42496	48614	40844	51060	10590	6902	6364	9512	19994	24458	39692	56752	47222	32542	53580	37732
23.79	190.172	191.18	[M+H]+	ION=[M+H]+	24408	3302	19392	23816	45188	31438	32632	31630	36142	8504	3522	3638	6174	14478	19790	30408	43748	33638	24684	36596	27176
23.8	292.202	293.209	[M+H]+	ION=[M+H]+	7486	2892	13210	14546	24182	18902	21106	14830	17530	5834	4148	3308	4400	7792	6880	15212	21798	16524	14618	16494	17482
23.8	639.34	640.347	[M+H]+	ION=[M+H]+	5278		8010	9744	12250	3334	20752	42898	26804	3886	1274	2380	5668	10642	21612	12870	16414	18526	28146	11770	23132
23.83	262.23	263.237	[M+H]+	ION=[M+H]+	20386	6202	24758	15560	14706	12696	5406	10952	10810	6882	2292	1800	5126	10838	18174	8362	8074	11184	21544	11122	8878
23.83	354.278	355.285	[M+H]+	ION=[M+H]+	59118	17126	68432	39748	34058	30298	13164	29426	30250	17512	5286	3194	13772	30244	46392	22104	21178	30144	56558	29428	27032
23.83	516.331	499.327	[M-H2O+H]+, [M+H]+	ION=[M-H2O+H]+	28288	9350	34808	19256	17444	16944	6958	14306	15792	9250	2770	1438	7324	13848	25290	12662	10260	12438	31370	15222	11984
23.83	678.384	701.373	[M+Na]+, [M-H2O+H]+	ION=[M+Na]+	63228	21886	71790	48140	41192	42184	18390	39722	36788	24346	7638	4294	19342	37340	54588	27034	24370	32792	68572	35470	34516
23.83	724.388	723.381	[M-H]-	ION=[M-H]-	32328	53512	59054	33442	24414	37272	11302	26500	25062	11868	24378	15816	38404	29994	48128	19290	15364	21862	44378	23266	23690
23.84	695.411	696.419	[M+H]+	ION=[M+H]+	35636	11276	44402	29560	24204	25076	10150	21818	20794	13856	3898	2728	10268	21200	31916	15488	15814	19356	43782	24676	19776
23.94	146.074	147.081	[M+H]+	ION=[M+H]+	5734		2444	110040	157200	175690	9066	23494	10008	9366	5808		9636	52558	10240	17196	104096	39938	67144	110786	60674
23.94	324.09	325.097	[M+H]+	ION=[M+H]+	2096			41708	57372	61388	3318	9064	3386	3454	1900		3574	17660	3928	5864	37892	14092	28800	43650	22724
24.01	336.266	337.273	[M+H]+	ION=[M+H]+	84326	20066	75818	54242	55878	50224	32260	41790	41308	35804	8216	7182	33364	63982	78554	37704	34364	40186	56604	52852	48284
24.01	477.285	476.278	[M-H]-	ION=[M-H]-	53858	69346	74410	52858	52128	56632	27738	42774	38668	33270	37102	29974	93310	67502	88120	36006	27982	39488	48676	49388	43206
24.01	477.286	478.294	[M+H]+, [M+Na]+	ION=[M+H]+	260390	59882	230478	160970	172008	144182	94738	124502	124128	109984	19586	16568	100678	186128	229742	110884	96098	123514	158366	162910	139874
24.07	695.411	696.418	[M+H]+	ION=[M+H]+	7402	4386	9312	15606	9040	7942	8628	21254	17010	7420	2908	1318		7166	11826	7852	6282	14040	23790	5856	10544
24.07	700.367	701.375	[M+H]+	ION=[M+H]+			17886	27540	17590	14008	14478	39824	28948	12084	5048	2586	4706	13304	23730	12330	12904	23246	42284	10112	17908
24.09	519.333	520.341	[M+H]+, [M+Na]+	ION=[M+H]+	485406	94070	463612	404140	445586	351660	406030	431352	387612	269718	66206	45792	216136	550116	645076	363154	334398	393146	415104	443566	420604
24.09	565.337	564.33	[M-H]-	ION=[M-H]-	60848	65622	82132	63868	69742	78810	66434	76054	68750	46054	71026	55144	112306	98884	107296	61678	59776	68798	68096	73212	68834
24.14	255.292	256.3	[M+H]+	ION=[M+H]+	29064	28220	29722	28540	25992	27316	31300	29076	31730	30066	29028	29878	27520	30446	30636	30348	29732	30456	26800	29670	29306
24.21	477.285	476.277	[M-H]-	ION=[M-H]-	40462	52120	55380	72584	101836	91690	93280	132744	97646	51974	69870	66538	94090	99970	107822	72482	65674	88200	100896	67276	107802
24.21	477.286	478.293	[M+H]+, [M+Na]+	ION=[M+H]+	214100	45256	194734	283444	376390	261554	334762	464550	337206	172136	42158	36492	105636	316804	322248	264874	253482	331932	373712	245776	367006
24.24	226.057	227.064	[M+H]+	ION=[M+H]+	98616	93472	91812	104060	103432	100012	98726	95112	91570	94094	90242	89032	89888	90972	89452	97590	94794	101608	102574	98774	97170
24.3	519.333	520.341	[M+H]+, [M+Na]+	ION=[M+H]+	458584	78810	426642	677850	789582	592368	1023312	1307194	952350	326876	96106	103402	253624	714540	884562	705796	741800	847216	895444	614772	938384
24.3	565.337	564.33	[M-H]-	ION=[M-H]-	57652	61828	76296	108426	122864	123734	155298	189442	142770	59200	97090	105680	123666	130864	142400	111318	109658	142120	129426	102902	146300
24.3	1038.67	1039.68	[M+H]+	ION=[M+H]+	16326		12802	34346	46070	27218	76122	117580	71878	7830				44184	64538	38662	40046	50252	57098	26802	64198
24.3	1060.65	1061.66	[M+H]+	ION=[M+H]+			4898	15134	21940		40418	50920	35696					21272	28936	18902	19642	26540	27406		33602
24.31	103.1	104.107	[M+H]+	ION=[M+H]+	15994	5338	14800	21452	20278	19488	20552	18424	17898	15166	6270	5770	12644	16930	17164	18326	18472	17478	21798	21304	18240
24.35	285.303	286.311	[M+H]+	ION=[M+H]+	38990	39826	39350	47288	46802	49298	52368	55528	52404	43828	41482	40190	38972	50640	51754	51466	49204	50634	48702	49334	48780
24.43	219.162	220.169	[M+H]+	ION=[M+H]+	47526	46598	47218	55646	55150	52590	50240	49014	47346	48116	47712	48334	44606	50204	48110	51744	51044	50484	52512	52222	50618
24.43	533.284	534.291	[M+H]+	ION=[M+H]+	1282		864	10278	21938	33514	1612	11370	1234	1882	1632		2892	24946	2052	1948	16186	5160	14354	19996	9970
24.44	283.323	284.331	[M+H]+	ION=[M+H]+	50230	45964	49528	49134	47076	48088	57272	47954	49488	49226	47794	47200	48190	54934	55780	50142	51234	56102	56778	46452	49410
24.49	331.324	332.332	[M+H]+	ION=[M+H]+	176106	98192	130630	197138	199708	126872	241346	191206	175126	165346	97416	145982	168074	233764	223756	217598	208648	195154	261560	460244	340042
24.49	407.323	408.33	[M+H]+	ION=[M+H]+	17040	18784	18186	22090	22164	21670	21620	20692	19726	21444	22000	20790	18958	17484	20020	21432	20904	20294	20598	20516	21942
24.51	366.243	367.25	[M+H]+	ION=[M+H]+	23868	25310	25586	28680	28576	29142	26744	26444	25712	24380	25696	28230	22826	23776	26078	27134	27710	25318	26422	28138	27760
24.52	494.214	495.221	[M+H]+	ION=[M+H]+	1484		1134	14650	26132	38740	1152	12680	1262	2240	1752		3868	31592	2636	2576	18392	5892	16206	21988	10404
24.58	450.187	451.194	[M+H]+	ION=[M+H]+	1424			13554	21860	37740	1156	8818	1458	2218	1916		3442	31232	2256	2352	15932	5574	13882	20002	9462
24.58	495.333	496.341	[M+H]+	ION=[M+H]+	22918	3550	25728	52572	49000	43144	46480	69748	53888	13790	4470	6172	9346	29922	42390	43310	40554	47230	46304	23088	50196
24.73	453.285	452.278	[M-H]-	ION=[M-H]-	21144	30502	33312	61848	76216	71206	45956	86736	57646	30168	35906	42786	38520	50704	60718	45766	35522	60786	64866	40306	78070
24.73	453.286	454.294	[M+H]+, [M+Na]+, [M-H2O+H]+	ION=[M+H]+	122862	26112	108534	258754	278524	219568	152964	324796	232216	120204	24862	23036	46194	156250	195818	175226	133212	241290	261644	165232	260454
24.77	199.194	200.201	[M+H]+	ION=[M+H]+	23164	8882	20860	19652	22360	21854	20796	27976	25012	13654	10312	10010	10974	18806	21890	23212	17200	22658	18172	21070	24632
24.83	495.333	496.34	[M+H]+, [M+Na]+	ION=[M+H]+	365402	75388	379538	717564	710296	662256	542722	818548	663248	248040	70688	72528	143334	448410	522572	584220	546058	664632	605450	448088	764842
24.83	541.337	540.33	[M-H]-	ION=[M-H]-	36998	46314	61272	102240	93920	119124	89510	125390	100588	40054	68088	72830	70218	82242	86908	86442	80420	102650	85898	67562	105816
24.83	990.668	991.676	[M+H]+	ION=[M+H]+	10184		9964	37622	39828	31002	23598	51886	33604					16962	23320	23796	22376	37796	26566	15682	43718
24.84	103.1	104.107	[M+H]+	ION=[M+H]+	16018	4630	13654	26762	24574	24370	20598	19740	21584	11346	3856	4236	6810	16356	17982	19490	20650	21486	21830	19316	21056
24.95	248.19	249.197	[M+H]+	ION=[M+H]+	71996	72394	73986	85436	83490	83898	77352	79418	75804	77210	74406	77788	70524	71902	72126	80692	78934	77758	80784	80484	79916
24.96	596.296	595.288	[M-H]-	ION=[M-H]-	37542	66028	71726	58734	68788	97964	41124	49492	39172	37402	54390	21482	61066	79170	80510	45460	27226	54166	69552	28798	38636
24.97	521.349	522.356	[M+H]+	ION=[M+H]+	124236	25328	118056	101530	129338	77358	51068	59308	58150	23780	4996	5314	33228	69548	69642	70906	76390	102182	117662	118024	106824
25.02	336.267	337.274	[M+H]+	ION=[M+H]+	65446	18760	69934	75204	79562	84670	45282	54812	43702	46944	10856	3952	22150	72328	86440	53176	35262	62042	84422	37640	41764
25.05	596.297	597.305	[M+H]+, [M+Na]+	ION=[M+H]+	21260	6248	22412	25074	25326	30106	14586	18798	13744	16368			7864	24940	26546	20084	11904	21820	28570	12810	13962
25.09	479.302	480.309	[M+H]+	ION=[M+H]+	16396	4542	16734	34616	43334	24734	18290	32236	23448	6958	1594	2414	4408	17276	16646	20434	21654	43426	43934	19196	36612
25.16	516.331	539.32	[M+Na]+, [M-H2O+H]+	ION=[M+Na]+	33844	9684	37114	29216	26498	24756	14042	26694	30230	15746	4156	2946	13058	20990	34938	18206	16176	19880	28478	22598	20336
25.16	562.335	561.328	[M-H]-	ION=[M-H]-	17358	26976	30910	20280	20186	24068	10730	22562	20958	10980	19976	14094	30398	23690	30170	13262	11110	18858	21474	16526	17212
25.19	567.352	566.345	[M-H]-	ION=[M-H]-	9082	11478	13760	22224	33992	19666	23622	30822	20626	5766	7668	13394	18934	17342	20200	19630	24320	34360	34966	22272	35854
25.2	521.35	522.356	[M+H]+, [M+Na]+	ION=[M+H]+	79524	16886	81532	152490	198714	103600	139880	196360	152384	34714	7884	13280	36958	97998	106904	138276	150892	223116	214396	133040	226160
25.33	225.21	226.217	[M+H]+	ION=[M+H]+	51312	8338	37726	36540	41304	42878	41768	73266	48032	22374	6104	5464	9720	41468	38776	47334	34864	44944	27350	37270	48928
25.35	296.235	295.228	[M-H]-	ION=[M-H]-	8826	8382	21982	19716	13884	10214	12356	17630	13464	7626	11358	20228	16392	12188	19460	18570	13838	20098	18186	34312	26660
25.37	262.229	263.237	[M+H]+	ION=[M+H]+	6208	2144	6676	14526	14204	8054	13662	27280	24504	6296	2368	2562	3604	8046	15188	8304	9088	11360	17996	8342	12936
25.37	317.233	318.241	[M+H]+	ION=[M+H]+	7994	1906	4934		29572	22938	11066	29544	9558	7392	2536	1930	4000	10304	8224	19824	17600	13644	20148	24850	20948
25.37	354.277	355.285	[M+H]+	ION=[M+H]+	11016	3170	11752	25342	22628	15096	24708	46726	37082	11268	4536	4188	5356	15198	24978	14632	16586	21848	33222	15246	22882
25.37	533.357	534.365	[M+H]+	ION=[M+H]+	5244	1546	5040	9930	10120	5786	12720	28304	22848	4674	1920	1880	2880	7148	10074	6308	8408	10796	15786	8988	12900
25.37	538.313	539.32	[M+H]+	ION=[M+H]+	13022	3966	12790	27550	23870	14552	27072	53012	45668	11372	4706	4098	6112	16536	25798	13752	17288	25072	36316	19418	25028
25.38	305.272	306.28	[M+H]+	ION=[M+H]+	4328	2276	4332				7156	31524	16008	5338	1512	1850	1624	3776	7968	5448	4894	11306	30792
25.38	562.334	561.327	[M-H]-	ION=[M-H]-	7370	10196	11978	19176	18286	12540	21800	45848	35056	10670	18682	19832	15486	13766	21942	11034	11724	17966	23748	12148	19118
25.43	340.133	341.14	[M+H]+	ION=[M+H]+	26392	27020	25442	30112	27964	28574	28320	27896	25868	27074	27528	27570	26722	25306	24678	26680	28748	27422	30386	29108	28492
25.47	150.09	151.097	[M+H]+	ION=[M+H]+	17944	15696	16922	20772	19882	20082	17612	18394	19696	19380	17156	17416	16474	16732	16668	20350	20124	19310	22606	20052	20512
25.5	596.295	595.288	[M-H]-	ION=[M-H]-	11264	35988	28470	61590	62136	56330	53410	109298	62400	25078	43414	18862	32954	54318	86218	37586	20378	67602	85058		42176
25.54	596.297	579.294	[M-H2O+H]+, [M+H]+	ION=[M-H2O+H]+	11526	7206	18130				40168	79532	50798	21884	5358	3160	8954	37462	60884	34536	18772	56974	73574		36866
25.54	618.279	619.286	[M+H]+	ION=[M+H]+	5556	3638	9284				16870	28510	20416	9324	2800	1296	3988	15654	23576	14536	9414	21050	30058
25.59	451.315	452.322	[M+H]+	ION=[M+H]+	19752	21144	21002	19158	17904	17828	19420	19786	20580	20190	19524	18134	20392	23740	22872	19670	18596	20628	18822	19340	18866
25.59	456.27	457.278	[M+H]+	ION=[M+H]+	23462	23962	23608	21498	21914	20052	21158	21216	21020	20846	20758	21388	24094	27720	24016	20848	21002	22270	20838	21226	21658
25.61	234.162	235.169	[M+H]+	ION=[M+H]+	31874	30724	30662	31644	32542	31408	29790	28728	29586	30194	27448	29598	28676	30920	34134	30390	32582	29504	29576	31934	30184
25.73	464.276	465.283	[M+H]+	ION=[M+H]+	5852	2042	7866	4160	3928	1212	9362	28618	15994	3210	1306	1512	2088	3956	9410	7676	9764	11124	23464	18828	22766
25.73	596.298	579.295	[M-H2O+H]+, [M+H]+	ION=[M-H2O+H]+				55620	54664	35258														11290
25.76	427.33	428.338	[M+H]+	ION=[M+H]+	20570	20882	21276	21912	22996	23564	24730	23758	23914	22716	21184	23208	18592	20838	21374	23392	22006	22412	24178	23738	23410
25.84	398.244	399.251	[M+H]+, [M+Na]+	ION=[M+H]+	28282	27518	29112	30088	33222	31276	30744	33738	33276	30098	32396	29544	29492	28128	27486	32586	30540	32596	32698	33798	32372
25.92	488.297	487.29	[M-H]-	ION=[M-H]-	5766	10342	14428	6636	6038	2634	16064	44680	24692	4936	6634	12094	9312	6794	16994	12524	13964	16324	32224	25036	37370
26.09	319.249	320.256	[M+H]+	ION=[M+H]+	23080	3154	12910	43984	62300	60110	21372	42996	17100	11452	2958	3150	8674	28468	26550	24694	49630	22734	32206	43516	49042
26.16	424.283	425.291	[M+H]+	ION=[M+H]+	5538	1966	10018	5018	4622	2480	13176	31254	18966	3976	1610	2012	2988	4344	10728	11226	13366	13140	21036	17914	22230
26.21	574.496	575.503	[M+H]+	ION=[M+H]+		10718	25862	4208	5448	5188		11412	17574	9304		24364			12684		11280			2018
26.24	481.318	482.325	[M+H]+	ION=[M+H]+	3804	1512	4370	17190	22442	12716	6420	11396	6346	4002		928	1976	7010	9340	4572	4024	9800	13312	5048	13102
26.27	394.2	395.207	[M+H]+	ION=[M+H]+	1856		1562	16732	34698	51188	1652	16472	1660	2558	2356		5012	46314	3502	3332	28536	8396	20404	27640	14858
26.27	483.247	484.254	[M+H]+	ION=[M+H]+	1724		1380	12616	23992	41320	1744	14256	2366	1984	1870		3608	35954	3130	2944	22462	6568	15812	21564	10836
26.27	488.203	489.21	[M+H]+	ION=[M+H]+	3200		2074	31334	62896	91620	2502	31114	3254	4666	3448		8240	84882	6666	5546	48880	14268	41696	52448	27634
26.36	148.016	149.024	[M+H]+	ION=[M+H]+	93706	87746	95012	97830	102012	99164	93770	106170	95994	98470	93894	92486	93662	100016	101418	105442	101004	96150	101148	101360	103320
26.36	300.134	301.142	[M+H]+	ION=[M+H]+	22680	27114	27250	31278	29500	29578	29946	26994	27934	26836	25920	30138	25278	27510	26602	29108	26680	24624	35632	33508	25506
26.36	523.364	524.372	[M+H]+	ION=[M+H]+	21268	6392	20350	81692	118012	69262	41710	63204	34448	15380	3158	4932	15628	42988	52258	30250	40568	60430	44288	31862	71502
26.46	278.227	279.234	[M+H]+	ION=[M+H]+	9032	2768	22698	13430	14352	5622	13144	19118	14458	5292	2928	3378	4646	11448	12548	16954	12768	13486	20190	23022	25666
26.5	260.214	261.222	[M+H]+	ION=[M+H]+	25928	4908	20668	22202	26078	23978	21278	32090	25422	11076	3642	3242	6398	25992	23012	26730	22942	26332	17714	22950	27814
26.52	227.225	228.232	[M+H]+	ION=[M+H]+	564544	101836	396128	424628	483680	467930	451772	742374	527086	242164	72516	69864	113592	438646	439222	522734	424498	489108	326472	426390	556916
26.53	277.24	278.248	[M+H]+	ION=[M+H]+	54498	8538	38780	32564	53186	52192	45082	69132	53282	24276	6328	5800	12138	50956	29294	54722	32806	51644	35528	47218	58376
26.55	346.242	174.128	[M+H+H]2+	ION=[M+H+H]2+	23258	21890	23218	31850	32792	32538	27312	28200	28852	27068	24692	24970	23228	20724	19226	26372	26686	31236	27740	31296	33238
26.67	277.24	278.247	[M+H]+	ION=[M+H]+	38532	6462	26126		36576	38538	30462	47648	34726	15830	5170	4864	9116	35210		36768		33452	24558	31292	41296
26.68	415.182	416.189	[M+H]+	ION=[M+H]+	24040	23688	24990	30360	30116	30240	27642	28710	26066	25272	29368	25644	26096	26972	25656	27010	26872	27516	27962	27892	27614
26.69	251.152	250.144	[M-H]-	ION=[M-H]-	23052	20334	25126	18232	18300	20200	18614	16820	20422	21294	18866	21138	23084	24486	24148	18682	16420	17384	17138	16016	18724
26.76	367.418	368.425	[M+H]+	ION=[M+H]+	102176	103608	99784	107370	110542	114860	111802	110578	107462	113936	112022	109196	128036	113470	111686	110066	108324	112760	107888	110482	114342
26.77	374.243	375.25	[M+H]+	ION=[M+H]+	27362	8442	20600	32162	33738	21090	22354	9122	12940	23142	7318	3366	8266	27538	15002	36352	36572	28262	27996	14888	18418
26.78	323.283	324.29	[M+H]+, [M+Na]+	ION=[M+H]+	10676	4740	13282	12482	12082	8528	12838	55820	28454	6926	4244		5464	7368	14132	15196	17526	20614	39978	11194	18936
26.92	643.487	644.494	[M+H]+	ION=[M+H]+	21172	20336	19674	25792	25716	25870	23538	23456	21950	19380	21408	21344	21052	19766	18660	24526	23496	25122	24870	24196	24026
26.93	122.11	123.117	[M+H]+	ION=[M+H]+	24296	5140	15810	18590	21522	19214	19176	26950	19094	9478	3470	3808	5354	20678	19210	21240	17998	19796	14586	16956	22782
26.93	148.125	149.132	[M+H]+	ION=[M+H]+	21952	3454	15486	17916	19450	19622	17252	26766	19502	10174	3438	3524	4998	17960	17412	19594	17954	17708	12170	16980	22742
26.93	236.214	237.221	[M+H]+, [M-H2O+H]+	ION=[M+H]+	129042	21702	93126	107668	123318	115512	102136	166986	121142	57418	15822	17724	29118	116502	104486	122948	101664	113676	83274	107128	133086
26.93	253.241	254.248	[M+H]+, [M+Na]+	ION=[M+H]+	1252262	199130	890192	1046396	1179082	1119068	993808	1645946	1226044	557056	149798	153020	282718	1129914	1003218	1255172	1003834	1117804	779520	1052930	1303666
26.94	126.105	109.101	[M-H2O+H]+, [M+H]+	ION=[M-H2O+H]+	18166	3990	15102	16016	16206	17666	15852	25174	16454	8522	3014	3130	4690	16262	15896	19018	14650	16926	10986	17112	20114
26.94	134.109	135.116	[M+H]+	ION=[M+H]+	24040	4600	18090	23708	23490	24128	22412	33462	24184	11958	3962	4104	7060	22346	19826	27170	22924	23160	15566	21368	24920
26.94	155.131	156.138	[M+H]+	ION=[M+H]+	21726	7066	18184	18604	20916	19082	17782	29128	20302	12576	6614	6560	7446	19660	17444	20582	16912	19000	15616	19012	21798
26.95	579.524	580.531	[M+H]+	ION=[M+H]+	9846	1774	9526	7590	9414		9492	21306	14434	5064	1090	4552	4732	7134	10264	9372	11536	10474	9944	38600	31968
26.96	194.116	195.123	[M+H]+	ION=[M+H]+	36748	39298	36694	24108	25256	25024	30888	31486	31656	33056	32336	32568	38584	43618	40938	30796	28670	30422	27852	27028	28168
26.99	599.462	600.469	[M+H]+	ION=[M+H]+	29742	27330	30304	39384	37058	39390	34904	34854	33988	31146	34226	29500	28656	30122	30952	33574	35984	36354	37624	36696	34154
27.01	150.089	151.097	[M+H]+	ION=[M+H]+	57302	50660	54846	41986	43512	42690	53102	53658	54146	57754	51740	53586	50508	54574	52162	51302	52884	53192	47100	48426	48718
27.05	555.434	556.442	[M+H]+	ION=[M+H]+	42210	42080	41036	58478	53290	53740	48284	46114	48564	46302	43972	43508	42106	43632	42628	47444	47856	50304	51374	52076	49414
27.1	241.241	242.248	[M+H]+	ION=[M+H]+	128808	21022	92282	105438	115214	110328	103020	172604	116576	54488	17258	17558	27240	108922	97480	121370	97626	109354	75428	97700	125882
27.12	511.408	512.415	[M+H]+	ION=[M+H]+	55330	53196	56044	67598	68106	69954	60742	63216	62724	60418	58190	55988	55244	54050	54152	64698	65156	64022	67808	64532	64350
27.13	294.166	295.173	[M+H]+	ION=[M+H]+	47970	44690	48300	48758	49652	49024	51074	49612	51046	48798	50500	47636	47418	49424	48520	50298	48640	53266	48108	51750	52768
27.13	478.255	479.263	[M+H]+	ION=[M+H]+	79448	73366	75090	82850	84290	84070	85108	84232	90692	85432	82678	81820	76164	78850	80140	79748	84150	91110	82862	90492	90844
27.18	467.382	468.389	[M+H]+	ION=[M+H]+	62204	58358	66032	74260	72998	72018	70846	69330	65688	67172	63134	63668	58602	62298	56994	70916	71570	68868	73622	71546	69134
27.21	285.099	286.107	[M+H]+	ION=[M+H]+	22376	22528	20124	26406	26678	25364	23720		22458	22064	21290	21972	23022	21010		23466	24580	22206	24806	24892	23196
27.24	406.329	407.336	[M+H]+, [M+Na]+	ION=[M+H]+	41216	41820	43176	56196	51400	50462	43656	48266	47726	44434	46640	43874	40686	44682	39722	47524	47626	47454	47480	48136	49134
27.24	508.28	507.273	[M-H]-	ION=[M-H]-		14554	17670								9612		20810	22546	24914
27.25	423.355	424.362	[M+H]+	ION=[M+H]+	44524	45372	49452	51462	54816	53834	52974	52080	48384	45060	44432	46826	44978	47218	45744	51562	52162	50742	53832	55022	53940
27.26	424.208	425.215	[M+H]+	ION=[M+H]+	42080	40612	46038	51278	50140	50098	47010	45070	42868	44442	40970	42456	41950	45874	43652	45812	45596	45602	49152	49036	50756
27.29	376.227	377.234	[M+H]+	ION=[M+H]+	19242	19578	19450	21002	21458	21420	18188	20872	17682	18422	19222	18288	18152	17674	19124	20562	22266	19602	19460	19662	19778
27.3	308.198	309.205	[M+H]+	ION=[M+H]+	75588	81998	68752	77634	70826	79392	78436	83092	73676	92226	81508	76096	77620	84872	83990	78784	90786	81850	82270	79494	75788
27.3	362.303	363.311	[M+H]+, [M+Na]+	ION=[M+H]+	95490	88728	94626	116782	116750	114388	101918	105910	109192	103768	100588	96028	90244	91026	89800	113478	110742	102096	112246	115650	115694
27.3	379.33	380.337	[M+H]+	ION=[M+H]+	16308	16514	16924	23334	20634	19572	17848	18786	18134	18058	16890	17416	16900	15662	16016	20786	18894	20382	19412	19756	21144
27.32	759.578	760.586	[M+H]+	ION=[M+H]+				1328			72538	17266	60396	57950	73406	57370					5440	55172	24062	46838	52054
27.34	132.073	133.08	[M+H]+	ION=[M+H]+	38202	35866	38234	43226	43846	43112	38798	42406	41684	38972	41396	38676	37564	37662	36586	41836	42162	40446	41792	42606	42010
27.34	318.278	319.284	[M+H]+, [M+Na]+, [M+K]+	ION=[M+H]+	232572	220890	226048	274794	273576	261444	249244	251100	250054	239300	248336	240486	215700	224322	215216	257202	266844	243112	263632	254936	263216
27.35	150.09	151.097	[M+H]+	ION=[M+H]+	112662	106100	112170	126202	132020	131926	120938	123398	119180	119858	117722	115176	110680	111344	108244	117742	125092	119374	133458	125048	123966
27.37	241.241	242.248	[M+H]+	ION=[M+H]+	85868	14780	65150	74534	77364	79512	65798	116548	77684	37222	12558	11606	23096	74838	66672	86198	70754	76360	56812	71902	89868
27.39	274.251	297.24	[M+Na]+, [M+H]+	ION=[M+Na]+	146162	160064	143388	178646	176522	160670	159510	143910	150508	161396	167406	166136	172348	142228	142472	156658	157868	145218	178562	163106	147266
27.4	106.063	107.071	[M+H]+	ION=[M+H]+	122208	124228	117108	140712	140728	141188	135248	123836	128126	127238	131796	129914	128788	125454	125322	136096	137516	139316	146588	133542	130688
27.42	99.0689	100.076	[M+H]+	ION=[M+H]+	24096	6090	18718	20318	21998	22288	21654	25294	22190	12682	4550	4890	7652	21186	20700	23330	19566	24034	16558	21262	24418
27.42	126.105	109.101	[M-H2O+H]+, [M+H]+	ION=[M-H2O+H]+	51510	9524	40852	45328	52318	46170	41640	56172	48224	24948	7652	8786	13596	45800	44092	50482	44340	46392	33066	43894	53150
27.42	112.084	113.092	[M+H]+	ION=[M+H]+	62440	7730	53402	62482	16776	65022	57074	68482	60964	10118	8104	6472	7530	14664	59550	65218	58094	60378	12380	57758	67272
27.42	120.094	121.101	[M+H]+	ION=[M+H]+	29440	6232	24194	24576	28308	28976	24288	31920	26508	14778	5344	4440	8128	26514	22744	28886	25320	25714	20348	24644	29660
27.42	122.11	123.117	[M+H]+	ION=[M+H]+	44830	9094	32308	40870	41598	46054	35280	49742	41480	22654	6438	5664	12120	43234	37584	43336	41822	39922	30086	37538	48480
27.42	134.109	135.116	[M+H]+	ION=[M+H]+	29460	5560	23546	28202	30352	29356	24182	33484	28630	15484	5282	5150	7378	29246	24418	28890	24732	26158	20386	26050	28992
27.42	136.125	137.132	[M+H]+	ION=[M+H]+	33338	6412	25160	29820	33792	32656	30136	40160	34360	15872	5374	4642	9676	32196	29126	32792	30662	31174	23740	31406	36744
27.42	146.109	147.116	[M+H]+	ION=[M+H]+	20150	3812	17032	19390	20610	19130	17018	24700	20276	11454	3846	3210	5866	20636	19940	22732	17974	20166	14560	20770	22414
27.42	148.125	149.132	[M+H]+	ION=[M+H]+	32620	6234	23758	27268	33104	26796	25182	35690	28056	14606	4180	4056	8426	28674	25286	28130	26124	31354	20874	25534	31502
27.42	150.14	151.148	[M+H]+	ION=[M+H]+	39122	7636	28714	37890	39388	40572	32448	44020	36780	18680	5722	6386	10440	38178	33664	37932	33676	37754	27462	37258	41504
27.42	155.131	156.138	[M+H]+	ION=[M+H]+	47608	11598	38784	43582	47290	46064	39114	55046	45508	25624	11260	9350	14386	44418	39664	47110	40072	43184	35298	40500	47022
27.42	160.124	161.132	[M+H]+	ION=[M+H]+	21916	5470	16692	19892	25484	22410	19152	25726	20942	12456	4292	4144	6026	22926	18760	23398	20142	24378	15134	21262	25482
27.42	162.14	163.147	[M+H]+	ION=[M+H]+	26324	6044	19734	25854	28132	25790	21034	32050	26502	14184	4566		6588	24384	23892	27872	23904	24044	19354	23506	28056
27.42	164.156	165.164	[M+H]+	ION=[M+H]+	64734	12212	48480	56384	65840	61608	53558	71722	60406	30092	10962	8976	17198	58610	56756	63724	54420	62126	45780	57534	66204
27.42	167.132	168.139	[M+H]+	ION=[M+H]+	17374	3590	12218	16048	17030	18096	15924	20650	18008	7880	1900	3226	4784	18912	15110	18344	15280	16320	11630	15292	19374
27.42	169.148	170.155	[M+H]+	ION=[M+H]+	34076	6754	26342	33504	35796	36278	29712	39626	34458	16516	5510	5214	8970	34836	32076	36914	31742	34586	26228		40818
27.42	174.137	175.144	[M+H]+	ION=[M+H]+	21176		16746	17858	23282	20954	19312	23604	19870	11068				20294	17652	21062	17552	19358	14602	18162	23174
27.42	178.172	179.179	[M+H]+	ION=[M+H]+	50550	8244	40874	49644	54132	51770	43536	61696	50484	25232	8744	6410	13588	48016	44788	53030	46834	50330	36474	46362	59024
27.42	183.163	184.17	[M+H]+	ION=[M+H]+	37454	7002	29288	32680	39328	36656	30294	43316	34576	16824	5348	4990	10348	35224	30208	37042	34512	35576	24940	33582	38586
27.42	197.178	198.185	[M+H]+	ION=[M+H]+	33424	6700	26668	30092	32146	29596	28296	38144	32080	16708	4188	4786	8826	30424	31380	34814	27836	30692	24094	27362	34442
27.42	262.23	263.237	[M+H]+, [M-H2O+H]+	ION=[M+H]+	433942	78344	328846	382212	434224	418862	357192	488812	401578	202328	61320	57766	109140	395170	370568	410412	373606	391926	286546	362140	447590
27.42	279.256	280.263	[M+H]+, [M+Na]+	ION=[M+H]+	1104688	174030	810262	939690	1038340	1041218	906580	1249758	998858	457486	133216	128462	249170	1028080	928610	1074854	864900	985356	695884	912746	1113520
27.42	558.513	559.52	[M+H]+	ION=[M+H]+	36316	1790	22786	29602	34508	34732	29282	50112	34970	10856			3030	33566	26934	37640	27682	30604	18392	30006	41734
27.47	376.258	377.265	[M+H]+	ION=[M+H]+	44456		21288	63538	57290	49588	21368	11348	13874	17830			8872	60968	20372	45642	40586	31542	33210	15206	18506
27.47	400.281	399.273	[M-H]-	ION=[M-H]-	28516	29292	26422	51856	47904	46006	24938	15802	16930	18714	25170	11038	29202	66402	23432	38382	31480	38100	31320	16890	22514
27.57	558.276	559.283	[M+H]+	ION=[M+H]+	7812		3256	16862	44672	78852	6228	20310	6964	7008	4144		19000	74236	19462	9724	46476	18184	33138	32918	15906
27.58	146.074	147.081	[M+H]+	ION=[M+H]+			9010	45260	125550	233144	16714	67180	19586	18484	11064		45382	230590	55332	31638	139942	52972	88336	101918	46926
27.58	440.152	441.16	[M+H]+	ION=[M+H]+	8198			15658	44670	79804	5424	23768	6186	5660	3094		15186	78970	19940	9150	47852	17518	28134	35784	16166
27.58	613.477	614.484	[M+H]+	ION=[M+H]+	24722	23458	24600	26588	28530	26244	25442	26652	25942	25134	24252	24998	22578	23046	21764	26734	26960	26884	26646	25778	27884
27.59	118.078	119.085	[M+H]+	ION=[M+H]+	6928	2308	4422	10218		41126	5642	13340	6264	5542	4194	2928	8860	38694	11304	8004	26858	12352	16698	19522	11166
27.62	279.256	280.264	[M+H]+	ION=[M+H]+	198182	30790	143820	161102	188458	181830	155860	239504	176884	83404	22554	23406	45234	176832	159574	187790	162132	179222	127196	168880	204642
27.64	434.242	433.235	[M-H]-	ION=[M-H]-	15652	22988	24054					30012	19252	10386	18030	8964	18822	32992	28518				608
27.65	494.25	495.257	[M+H]+	ION=[M+H]+	23324	16402	22924	25244	25208	27952	21820	19188	21548	21274	12446	9948	19288	23952	21614	26060	24626	22880	21908	19724	19642
27.65	569.451	570.458	[M+H]+	ION=[M+H]+	30242	31290	29156	37608	35422	37590	31986	32444	32708	30978	32486	31642	29822	29972	31844	33950	33712	32418	36470	34754	36044
27.67	262.23	263.237	[M+H]+	ION=[M+H]+	104320	20028	82502	98868	102998	84174	79432	97670	71664	57584	14820	9868	29494	132836	84860	116256	116608	98756	66104	66832	83634
27.68	400.282	399.274	[M-H]-	ION=[M-H]-	60984	62844	68246	85924	73628	74734	57312	28528	32258	52586	59698	21032	66676	125274	58654	93768	88956	76508	57752	25500	39750
27.69	354.276	377.266	[M+Na]+, [M-H2O+H]+, [M+H]+	ION=[M+Na]+	460964	64860	301018	423456	444098	268596	292896	104792	151968	225124	43054	19292	101490	554836	236034	525426	497160	426400	280872	119362	162848
27.69	1118.75	560.382	[M+H+H]2+	ION=[M+H+H]2+	41924	3082	29386	40348	45062	27986	29740	5686	12018	19864			7514	59580	24280	53212	54840	41254	28294	7844	12874
27.71	363.28	364.287	[M+H]+	ION=[M+H]+	6846		6418				9194	15900	11130				4970	9592	8566	11810	10998	14644
27.71	632.5	631.493	[M-H]-	ION=[M-H]-	7438	6910	10920	12400	12164	6528	12252	8310	6788	5768	9428	4162	12342	25258	11442	25574	18816	21524	12188	5452	8862
27.72	385.26	386.267	[M+H]+	ION=[M+H]+	17906		21790	2914	6656	2662	30586	42976	29600	6724			10542	31526	28360	42720	35578	43868	8372	3878	5060
27.72	525.424	526.431	[M+H]+	ION=[M+H]+	34910	37514	34412	43692	42252	41282	38226	40970	40412	38516	38884	38284	35836	32276	34828	39442	39528	38698	40374	41202	42084
27.72	514.128	537.118	[M+Na]+, [M+H]+	ION=[M+Na]+	3688			39900	57680	63928	4564	19558	4532	5040			5130	33952	9388	9478	53850	18186	36398	42052	21950
27.72	890.387	891.394	[M+H]+	ION=[M+H]+					22912	20836		4976		1840				13854	2830	3908	21816	6532	11678	10376
27.73	759.578	760.585	[M+H]+	ION=[M+H]+	41596	30030	11028	1116				15480					1456				4096
27.74	278.224	277.217	[M-H]-, [M+H]+	ION=[M-H]-	31330	27844	40958	37266	42884	20130	53286	73432	62270	26166	44370	42656	52956	46396	51308	63100	59264	62094	63382	55910	73722
27.75	250.23	251.237	[M+H]+	ION=[M+H]+	21250	3312	14340	18170	21088	18604	15512	26094	18208	8764	3340	2818	5356	17130	17776	19606	18382	17838	14138	17526	21790
27.75	267.256	268.264	[M+H]+	ION=[M+H]+	216520	34390	150708	191046	214506	207738	174030	295138	201770	96432	28380	29598	53300	203008	184878	216904	175848	191866	144254	196280	232502
27.75	378.149	377.142	[M-H]-	ION=[M-H]-	9724	6372	15682	8646	13630	4572	24094	40804	25858	8284	16868	23562	18440	11264	21128	26874	23896	29880	26582	24932	34412
27.77	428.254	429.261	[M+H]+	ION=[M+H]+	22296	17622	22186	25122	25958	24124	25522	26106	25076	21916	20514	19404	20170	23718	20892	25732	25524	25710	26864	26780	24278
27.79	481.398	482.405	[M+H]+	ION=[M+H]+	37364	35292	35108	40992	41358	40660	40602	38276	39786	37716	37344	37724	36256	33240	33912	38058	42452	38904	41024	41640	40388
27.79	657.502	658.509	[M+H]+	ION=[M+H]+	17392	16814	17684	19528	19844	20456	17714	19944	17536	17768	17136	17078	16002	16444	18218	17912	19328	18564	19290	20784	21654
27.82	194.116	195.123	[M+H]+	ION=[M+H]+	49086	48062	52894	42580	44118		46254	51500	46112	47550		46136	49950	51888	51746	47140	46908	47528	43130	44962	47338
27.85	359.055	360.063	[M+H]+	ION=[M+H]+	33400	32918	33042	34634	35282	36654	35646	35530	34372	35610	35072	33482	33860	34198	33550	35232	37226	34364	34904	36002	36104
27.86	613.476	614.483	[M+H]+	ION=[M+H]+	26366	24082	25906	31102	29698	31452	27242	28084	25730	26134	24900	23498	22910	24244	25882	28030	29044	30806	29334	28904	29488
27.87	150.089	151.097	[M+H]+	ION=[M+H]+	108244	101680	109066	71712	72954	75778	87592	92522	90818	92996	87796	91482	106942	112074	106226	82498	88116	86620	76802	75912	81926
27.92	434.241	433.234	[M-H]-	ION=[M-H]-				24824	25008	30486			10128	5498	4626					19922	8610	24888	43566	17912	21696
27.93	569.45	570.457	[M+H]+	ION=[M+H]+	36224	36500	34722	45772	44678	44850	39136	41152	41214	37484	38736	36286	34296	37092	35280	41518	42388	40070	43810	41504	41314
27.96	106.063	107.07	[M+H]+	ION=[M+H]+	30968	26924	29388	25332	25300	25662	29850	28588	29144	31358	27814	28288	28724	30284	28964	30240	28132	29022	27276	26170	28008
28	525.424	526.431	[M+H]+	ION=[M+H]+	50714	52140	50850	61546	62782	60820	54582	56940	57276	57818	53850	54436	51926	50892	49876	59302	58742	56064	58386	57362	60376
28.04	155.131	156.138	[M+H]+	ION=[M+H]+	47130	46774	46862	51314	51332	50844	46692	47424	46566	48508	47220	47524	43068	44926	43730	51318	47092	48370	51990	46672	52720
28.04	255.256	256.263	[M+H]+	ION=[M+H]+	80910	16758	59900	73954	80472	73662	69384	118808	77844	40198	12654	12026	21256	75938	68812	80592	69496	78802	53378	65542	88890
28.08	481.398	482.405	[M+H]+	ION=[M+H]+	60174	61114	64142	73222	72050	76898	68120	65488	64944	63310	64986	62892	56544	60506	60936	67592	68114	66292	71286	70546	70550
28.12	285.099	286.107	[M+H]+	ION=[M+H]+	33146		28678			36052	31498	33478	32566			30766			28986	33776	32480	31838	31468	34056	30906
28.14	420.344	421.352	[M+H]+, [M+Na]+	ION=[M+H]+	39060	37726	40322	45392	42414	41930	42244	41538	39320	42028	39010	38712	37944	41326	38402	41026	42268	45432	41108	43620	43238
28.15	437.372	438.379	[M+H]+	ION=[M+H]+	51552	53856	55170	59424	60642	59788	58118	56986	57434	54792	53730	53028	52454	51286	54888	59166	57140	56978	58446	55568	62952
28.2	173.121	174.128	[M+H]+	ION=[M+H]+	106970	102158	99436	114074	114120	109078	106896	104798	103512	104922	103264	104188	99858	109738	97000	106618	105726	106214	107158	106510	112610
28.21	376.318	377.326	[M+H]+, [M+Na]+	ION=[M+H]+	98622	96574	96348	120480	117800	111916	109736	108616	103556	103676	106220	104262	99240	94288	98760	118140	110748	106124	113110	117678	110654
28.21	393.345	394.352	[M+H]+	ION=[M+H]+	23742	21000	22860	27480	26948	26546	26124	26574	23988	24964	26116	24872	22848	22242	23776	25436	25772	25906	27030	26814	27000
28.21	426.238	427.246	[M+H]+	ION=[M+H]+	48260	45766	49206	57574	59402	50208	51856	51922	47818	47606	44944	43168	44240	50474	46272	55202	53960	47128	48512	52744	55666
28.22	126.105	127.112	[M+H]+	ION=[M+H]+	54086	48130	52844	59536	62428	65544	57092	56874	56826	52562	51870	50130	46772	53368	53408	57204	59772	56458	57476	57562	62856
28.25	255.256	256.263	[M+H]+, [M+Na]+	ION=[M+H]+	1689930	293310	1243282	1535310	1756304	1545298	1319464	2250346	1578814	788760	221618	218810	411522	1546770	1451646	1749004	1455376	1453110	1083746	1371060	1777108
28.25	332.293	333.3	[M+H]+, [M+Na]+	ION=[M+H]+	112238	109420	112686	122282	129346	123758	119626	116344	114988	113188	112228	109718	99982	109478	101938	115776	121850	118070	118382	122756	123240
28.26	150.089	151.097	[M+H]+	ION=[M+H]+	66918	62622	67274	79994	76334	79376	75650	74704	71578	70506	66016	68606	67728	68802	62254	73014	72522	71784	75092	74062	76678
28.31	310.247	311.254	[M+H]+	ION=[M+H]+	42582	45720	38782	54432	47790	36196	37160	46850	38288	48106	39484	36942	42102	43608	42382	48146	37616	35398	39898	52248	41402
28.31	738.112	739.119	[M+H]+	ION=[M+H]+	23330	21914	21738	27256	26490	24520	23722	23764	22256	23372	23216	23522	23512	23550	20284	24208	26156	23140	25480	25102	26016
28.32	106.063	107.071	[M+H]+	ION=[M+H]+	35194	35280	36420	41246	39804	43150	40974	38350	40426	39510	38320		34540	37384	37318	39300	40206	40672	42210	42264	43748
28.32	115.046	116.054	[M+H]+	ION=[M+H]+	17262	19238	16838	21248	21302	18890	15774	21066	18016	22264	19582	18024	20020	16174	16402	20604	19572	16708	19078	20042	17972
28.32	171.108	172.115	[M+H]+	ION=[M+H]+	39828	47656	39012	49092	49132	35078	35660	44084	35268	45738	42450	38756	44418	40118	39830	48244	38088	33974	35968	50410	40642
28.33	400.017	401.024	[M+H]+	ION=[M+H]+	17050	19528	19022	22056	21292	20648	19138	18266	17856	17424	17274	18334	17268	17572	15868	19966	19344	18988	19530	19290	19344
28.38	267.257	268.264	[M+H]+	ION=[M+H]+	40700	7216	26590	41192	43236	37828	29456	64794	35322	18860	5446	4808	9566	41030	33508	44492	33440	34348	25854	38378	44688
28.42	216.096	217.103	[M+H]+	ION=[M+H]+	26458	28444	24986	24788	26398	23160	26086	27208	23918	26504	25186	25852	28118	26518	24964	26474	26058		24696		24548
28.42	263.117	264.124	[M+H]+	ION=[M+H]+	67602	68412	69144	71308	70312	74982		69882		68640	74786	75466	67436	68466	71622	69200	72170		73688	74464	77926
28.46	803.546	804.553	[M+H]+	ION=[M+H]+			140908			152010	154280		143588		89834	116108					130016	159042	116758	19626	68258
28.56	378.279	377.272	[M-H]-	ION=[M-H]-	47422	45104	45146	41150	46532	42872	43104	51838	42394	47072	44788	47276	44524	45658	39206	43054	45440	43388	39922	44706	51534
28.57	238.241	239.248	[M+H]+	ION=[M+H]+	2297386	2123272	2210816	2530914	2520758	2494116	2294096	2263060	2241190	2370424	2190428	2120020	2153160	2251380	2338176	2358140	2400506	2268996	2389978	2350708	2355150
28.58	264.245	265.253	[M+H]+, [M-H2O+H]+	ION=[M+H]+	509552	150258	429272	523596	574456	530736	465088	622224	510194	334078	113554	114472	199604	503200	477990	547764	490464	499310	421212	511938	559148
28.58	562.802	282.408	[M+H+H]2+	ION=[M+H+H]2+			31396				38578		43078	21536				39732			42146
28.58	281.485	282.492	[M+H]+	ION=[M+H]+									74084						41980				54666	74282
28.58	844.455	282.492	[M+H+H2]3+	ION=[M+H+H2]3+	62756		45234	80854	77240	77712	41314	91504		25374				49076		80746	70638	72534			87550
28.58	376.282	375.274	[M-H]-	ION=[M-H]-	47422	45104	45146	65380	73670	65184	43104	51838	41876	47072	44788	30430	57914	80698	52952	65874	45440	59132	39922	37494	51534
28.58	1462.28	732.148	[M+H+H]2+	ION=[M+H+H]2+	16484		6266	23806	25852	13006	9866	31094	10394	10476			3538		11316	22800	10538	12334	11792	21752	19846
28.59	99.0688	100.076	[M+H]+	ION=[M+H]+	36890	13702	30124	38198	39218	38822	33536	43578	37042	25218	11730	11626	18086	34236	34072	37794	36666	33298	32638	37248	37436
28.59	108.094	109.101	[M+H]+	ION=[M+H]+	44644	14718	38920	44660	49298	46096	39086	51634	43742	29934	11344	11408	19154	44544	46850	45776	41304	42992	37844	41262	47080
28.59	110.071	111.078	[M+H]+	ION=[M+H]+	29608	12332	26330	31376	35722	33210	31094	38324	30800	21614	8432	8142	13450	32298	27700	33420	31158	31860	25416	30606	35144
28.59	138.105	121.101	[M-H2O+H]+, [M+H]+	ION=[M-H2O+H]+	40314	14478	31838	39264		38944	34648	46348	38234	26786	10126	9582	16318	38972	36636	40064	37454	42696			40620
28.59	122.109	123.117	[M+H]+	ION=[M+H]+	41366	13222	33932	40108	46582	43300	37760	47288	38162	26182	11978	10596	16866	38770	36266	43064	39936	39490	33344	39540	44126
28.59	124.089	125.097	[M+H]+	ION=[M+H]+	27834	8920		29334	28184	27388	26660	32112	26418	18438	7166	6308	10734	26866	25346	28294	28244	26044	21852	29152	28474
28.59	124.125	125.132	[M+H]+	ION=[M+H]+	35314	12314	31052	38652	39448	38716	35238	40306	33710	24408	9426	9154	15360	35086	33480	39000	33794	34462	30462	37054	38998
28.59	152.12	135.117	[M-H2O+H]+, [M+H]+	ION=[M-H2O+H]+	63380	21420	56354	66770	71528	67078	61646	77248	65496	43280	16138	14704	27904	67308	58712	73740	64576	64950	53678	66456	71374
28.59	136.125	137.132	[M+H]+	ION=[M+H]+	33118	9370	30222	35978	36682	37052	31148	39760	33482	23450	9182	8840	14150	35524	33556	35836	32832	33988	28712	33176	39166
28.59	148.125	149.132	[M+H]+	ION=[M+H]+	62154	16920	51938	60732	63628	63098	55872	70582	59056	35636	12104	13048	23430	57866	57544	61576	55170	54170	46914	58354	63664
28.59	150.14	151.148	[M+H]+	ION=[M+H]+	34558	11036	31576	37406	40142	37328	32214	44074	34772	21726	8880	7690	15048	36626	33948	37340	33586	36158	27806	34990	40314
28.59	155.131	156.138	[M+H]+	ION=[M+H]+	93252	49102	79236	99546	101088	94394	83786	101578	86600	72454	52410	49742	53000	86630	81826	94010	86518	88670	81530	88808	99288
28.59	162.14	163.147	[M+H]+	ION=[M+H]+	42354	12088	32766	40426	45000	43356	37712	47530	42362	27050	9628	9860	15770	38924	37242		37756	39346	33482	40262	43450
28.59	164.156	165.164	[M+H]+	ION=[M+H]+	30584	7904	24092	30060	32230	30188	26700	34550	28524	18050	7134	7074	11608	27578	26698	29142	25832	29032	24096	30890	32708
28.59	169.148	170.155	[M+H]+	ION=[M+H]+	59732	17928	49704	60660	62184	61500	53236	67418	59180	36246	14222	13426	22750	61184	54016	65980	56036	59978	49172	58546	66080
28.59	176.156	177.164	[M+H]+	ION=[M+H]+	27484	6706	22802	27260	30732	27064	25338	32120	25418	16578	5718	4976	10630	26804	22652	28680	26348	24980	21896	26390	28816
28.59	180.187	181.194	[M+H]+	ION=[M+H]+	17492	4830	12968	17292	21422	18340	15694	23108	16144	10820	3710	3422	6266	16992	14904	17888	16156	17732	15242	16954	18688
28.59	183.163	184.17	[M+H]+	ION=[M+H]+	57468	15350	46208	55872	60776	57662	49520	66644	57846	33998	11630	12518	20782	54946	51156	61300	54114	54768	45534	55134	62204
28.59	190.171	191.179	[M+H]+	ION=[M+H]+	21552	6104	17318	21640	20784	21250	19230	24298	22644	14310	4830	4812	7446	18806	18116	22952	19820	19940	15086	19388	21380
28.59	197.178	198.185	[M+H]+	ION=[M+H]+	54102	14238	41806	51780	55692	52100	45704	61446	49250	31340	11658	11738	18198	53360	47568	53200	46980	51146	40842	51662	56444
28.59	211.194	212.201	[M+H]+	ION=[M+H]+	48736	13438	39576	48050	54448	48598	43050	57588	45532	30344	10644	10046	18478	47528	41082	51036	47006	45018	35090	47324	50566
28.59	225.21	226.217	[M+H]+	ION=[M+H]+	42906	12168	33776	43190	45328	43370	36146	49616	42312	25498	9428	9398	17414	40016	35828	44312	39664	43100	32216	40692	44934
28.59	281.272	282.278	[M+H]+, [M+Na]+	ION=[M+H]+	9029398	2149432	7155536	8774750	9234914	8745426	7902296	10059422	8617482	5170198	1631420	1603620	2945402	8714222	7984706	9140478	8148618	8593678	6976506	8590904	9400888
28.59	281.401	282.408	[M+H]+	ION=[M+H]+	46036	8136		51116	58514	49320		58808			7142	6622	12712		37820	46914		42612	34976	49002	50786
28.59	845.066	282.696	[M+H+H2]3+	ION=[M+H+H2]3+	35556		20414	34402	40566	38206	24552	49334	30634	8514			3294	30048	25390	36768	28476	28064	20602	30624	39778
28.59	845.199	282.74	[M+H+H2]3+	ION=[M+H+H2]3+	68332		34496	69306	76508	70536	50862	87030	58886	15244			3596	58478	46180	70992	60116	61054	36454		79652
28.59	374.293	397.283	[M+Na]+, [M+H]+	ION=[M+Na]+	23168	26244	22696	27842	25108	25838	23788	22756	23166	24004	23146	23042	23586	20102	20524	23694	23296	22478	24864	24324	23798
28.59	402.297	401.289	[M-H]-	ION=[M-H]-	20442	19224	21296	27626	25436	25214	14326	7188	10896	10416	14372	8508	19592	36296	14276	39012	30228	31628	17684	11546	15416
28.6	166.171	167.178	[M+H]+	ION=[M+H]+	17492	4830	14056	18328	20340	18376	17178	22292	18070	11388	3990	3872	7574	18122	17556	19986	17402	19088	14730	18606	20098
28.6	562.544	563.551	[M+H]+, [M+Na]+	ION=[M+H]+	761498	60028	495806	666578	782034	725438	586914	970148	679816	294926	45020	44096	111400	736222	624154	786940	626774	707586	462788	694908	834588
28.61	352.259	353.266	[M+H]+	ION=[M+H]+	147024	32934	25970	181986	202148	61860	41390	44682	36868	93250	9962	5436	43424	206364	58388	160168	111056	69428	69116	36994	57292
28.63	426.238	427.246	[M+H]+	ION=[M+H]+	28662	38360	28740	41954	38514	42926	32702	33902	31858	38664	36712	34836	35936	29538	28576	33874	32578	28568	35924	36432	31796
28.66	303.254	304.261	[M+H]+	ION=[M+H]+									721590				199018				634622		607746
28.68	280.24	279.232	[M-H]-	ION=[M-H]-	336276	253016	482278	335936	397984	217796	485630	646556	584614	231542	378426	421386	563432	566248	622776	684472	542604	619532	575104	415614	610516
28.68	326.245	325.238	[M-H]-	ION=[M-H]-	37216	30588	52262	37988	37252	23502	57294	59130	59844	28656	39554	48656	57580	60302	64316	61420	55002	61484	58094	39438	55754
28.68	380.165	379.158	[M-H]-	ION=[M-H]-	67654	54726	58930	51402	59732	39584	57996	62980	61712	79302	58272	65096	61982	62076	59896	55054	63958	62624	64934	59616	68608
28.68	434.242	433.235	[M-H]-	ION=[M-H]-	4998	9138	11518					36778	12490				12564	23952	26710					728
28.68	560.479	559.472	[M-H]-	ION=[M-H]-	80858	58086	123598	76494	89442	46874	135296	170060	147714	52986	89338	110256	158644	147218	174766	169922	137356	161452	156966	105552	164750
28.69	262.229	263.236	[M+H]+	ION=[M+H]+	22378	6778	17658	19898	21662	12078	24958	29160	29068	14332	6174	7006	14132	23678	25384	29208	30864	27114	26664	19180	28694
28.69	263.117	264.125	[M+H]+	ION=[M+H]+	129708	93940	126414	134548	135224	114544	133422	139162	129618	120888			114032	127236	128084	143784	143234	135308	135614	134636	144770
28.69	785.592	786.6	[M+H]+	ION=[M+H]+	17038	6916					26874	8166	24004						11194			20200	6448	7634	10222
28.7	194.116	195.123	[M+H]+	ION=[M+H]+	35616	36864	32350	37866	38108	38946	36834	37380	34330	36888	36560	36900	36610	35420	31606	36848	37182	35702	35850	38722	36810
28.7	781.564	782.571	[M+H]+, [M+K]+, [M+Na]+	ION=[M+H]+	172004	4930	1268694			638640	671680	4780	695860	29366	427870	564150	209212	304480	835070		576880	724496	519066	108414	354462
28.7	804.046	805.053	[M+H]+	ION=[M+H]+	6042		26684			11800	14868		15140					11746	18926		16094	11008			6432
28.72	170.131	171.138	[M+H]+	ION=[M+H]+	122558	116752	119186	155528	154402	159780	138960	133164	131750	138706	137302	130218	125626	123858	113442	136874	152488	132124	135608	140574	147328
28.72	402.298	425.288	[M+Na]+, [M+H]+	ION=[M+Na]+	38512	50076	34674	46980	48030	50558	35228	35906	34112	41794	45960	47058	40880	37162	32358	36516	40432	35244	33998	40634	38190
28.73	757.564	780.553	[M+Na]+, [M+K]+	ION=[M+Na]+				662			210338	128884	2222	154190		57226		2820		330300	2936	262566	497458	387622	29416
28.75	150.089	151.097	[M+H]+	ION=[M+H]+	63336	63678	60024	65868	66618	65006	60242	59730	61306	63182	64272	61256	64422	61236	56910	61184	64602	59298	57620	63466	60398
28.83	408.285	409.292	[M+H]+	ION=[M+H]+	51242	47770	47272	60446	57294	50586	43016	48762	53120	44636	48124	30134	44178	45914	43702	50328	53322	43464	47526	43766	53216
28.84	242.189	243.196	[M+H]+	ION=[M+H]+	23102	22958	22932	25454	25976	24636	26216	22716	22854	22048	20712	19342	18984	22864	21304	29008	28514	28148	25386	21760	24078
28.84	269.272	270.279	[M+H]+	ION=[M+H]+	178500	33040	116536	166982	189436	174474	132570	237144	161964	75070	24832	21000	43796	156022	148226	174858	147670	154110	109832	143968	182978
28.84	583.465	584.473	[M+H]+	ION=[M+H]+	23784	22192	22646	27168	27194	26750	24134	22922	24346	22494	22836	21498	20828	23324	21786	22740	26690	24868	26206	25682	23732
28.85	827.565	826.558	[M-H]-	ION=[M-H]-			18960	11782	7584	13920	13746		15976	948	16106			15798	28410	13158	12152	16084	11658	13204	10014
28.86	356.292	379.283	[M+Na]+, [M+H]+	ION=[M+Na]+	145646	18940	65866	142964	160842	62248	22910	8814	36836	17880	8968	2144	28208	229338	61430	118678	237278	75430	29452	9626	55548
28.87	402.297	401.29	[M-H]-	ION=[M-H]-	22286	20916	23812	22062	24158	20608	18018	5924	7910	18172	17608	8226	22048	41830	14812	41034	38954	32384	17364	10490	12724
28.87	428.254	429.261	[M+H]+	ION=[M+H]+	21282	21996	18672	26388	25670	25418	19018	19790	22450	17524	18796	13780	19726	19886	20000	20736	21858	20764	20120	17844	24252
28.89	426.239	427.246	[M+H]+	ION=[M+H]+	29992	31150	27326	38250	38310	35326	23586	24378	27400	21688	28370	19654	30534	29340	27512	27384	32408	27608	26010	25110	32192
28.92	539.439	540.446	[M+H]+	ION=[M+H]+	32970	33028	30846	39294	37454	36758	35200	33466	32768	33496	32598	29532	29570	34586	32844	35924	36084	36874	36544	36362	36294
28.93	307.287	308.294	[M+H]+	ION=[M+H]+	29290	5314	21942	26996	32474	29482	20198	33276	27058	12276	5152	3988	7296	26504	24452	25578	24214	22374	17384	24160	31708
28.99	495.413	496.42	[M+H]+	ION=[M+H]+	38552	35888	38572	45386	42810	45908	40448	39882	41788	37916	37218	35698	35812	36500	36752	40360	43082	42116	44598	40800	44920
28.99	755.547	756.555	[M+H]+	ION=[M+H]+	19218	774	69140			62938	59170		50270		36736	47862		21828	30326		51604	64734	40690	8508	36814
29	133.151	156.138	[M+Na]+, [M+K]+	ION=[M+Na]+	61154	59184	62618	37600	39368	39326	49630	49830	54432	48836	57156	48924	62482	64016	63192	44872	53910	45530	38168	39086	45560
29.02	2316.65	1159.33	[M+H+H]2+	ION=[M+H+H]2+	1654						14444			26498						23400		11694	14396	20346	680
29.03	173.12	174.128	[M+H]+	ION=[M+H]+	30678	28690	29714	35606	36676	36204	29670	29708	33114	28256	31614	29432	27564	29274	30678	30242	33552	31450	32060	32104	34686
29.05	434.359	435.367	[M+H]+	ION=[M+H]+	20522	20430	19996	22602	23618	23898	21700	19468	22226	19258	19294	20000	17268	18600	17838	22300	21662	21436	20998	23380	22446
29.06	451.386	452.393	[M+H]+	ION=[M+H]+	32954	31476	35094	40598	38828	41408	34400	36836	37328	33592	33272	32732	31324	32218	33210	34584	35914	35348	36174	38208	38882
29.07	757.564	758.571	[M+H]+, [M+Na]+	ION=[M+H]+	154910	199202			684		571532	654726		755440		488262	206766	233176	234446	729176		530776	559338	635578	125850
29.08	370.095	371.102	[M+H]+	ION=[M+H]+	16758	14278	18516	26036	18134	23158	12774	13872	19726	22226	15876	17160	18642	17412	14310	13342	19336	14958	14638	18346	20320
29.12	390.333	391.342	[M+H]+, [M+Na]+	ION=[M+H]+	55606	49792	55290	60614	61382	61248	55822	56098	58144	51728	52898	50300	47356	50352	51372	54688	58874	56920	59582	57686	60162
29.14	269.272	270.279	[M+H]+	ION=[M+H]+	44270	8880	31088	47126	49574	41776	32098	56292	41874	17188	7692	6914	11486	41894	38782	40714	39276	36542	26728	36960	46114
29.16	346.308	347.315	[M+H]+, [M+Na]+	ION=[M+H]+	74652	70572	79196	80294	81812	88490	80186	78630	83068	74682	80234	76054	69060	73724	72952	80604	85228	81784	84116	76404	90852
29.17	150.089	151.097	[M+H]+	ION=[M+H]+	55722	54516	58134	60842	60024	63080	60686	57398	58778	55198	59102	56900	52618	54242	57768	58480	63564	60672	61876	62530	63698
29.19	255.256	256.264	[M+H]+	ION=[M+H]+	29876	28412	30722	31250	31560	32720	26710	27922	31282	24778	28910	25652	27546	29586	27702	29032	29674	27280	27848	28980	29662
29.19	1559.09	780.553	[M+H+H]2+	ION=[M+H+H]2+		46010							2850		3740		45380	47974	54446		2944
29.22	803.565	802.558	[M-H]-	ION=[M-H]-				21018		16502		22568											24314	26048	23318
29.23	106.063	107.07	[M+H]+	ION=[M+H]+	58488	53522	57086	60170	59712	63580	54772	55042	56996	55280	59204	58148	50682	56710	56342	58994	61080	65120	65942	56418	60930
29.23	324.263	325.27	[M+H]+	ION=[M+H]+	67548	65406	71826	92518	92164	74092	46900	53904	70862	44444	70900	50708	59564	58640	56964	55292	74068	52962	57314	63650	66834
29.35	803.566	802.558	[M-H]-	ION=[M-H]-	23824	19168	24686		24394	13620	27192		22706	21470	1126	24118	19244	25140	24788	25316	25942	23920
29.41	295.288	296.295	[M+H]+	ION=[M+H]+	47176	8230	33316	46282	51044	43992	35808	63626	45970	19330	6234	5776	12198	44552	38326	44322	40622	41668	29268	40668	52816
29.45	166.986	167.993	[M+H]+	ION=[M+H]+	21132	20334	20078	23812	25428	21284	18420	20344	22150	19694	21128	18982	20626	19144	19268	21702	21898	19492	21218	21436	19362
29.46	307.287	308.295	[M+H]+	ION=[M+H]+	45420	43000	47772	50762	49080	50438	43004	43620	44278	44046	46820	41830	41286	43212	42826	43442	49894	48108	43092	45182	49946
29.48	715.516	716.524	[M+H]+	ION=[M+H]+	68454		197682			176584	162334	5864	127598	9614	160460	119044	78242	80304	107930	5466	160640	125766	149876	34170	84432
29.51	285.099	286.107	[M+H]+	ION=[M+H]+	41766	44198	36574	58602	58450	47054	30894	31434	41760	35256	40164	33386	36664	34328	31128	36216	45058	32982	36314	42276	42728
29.58	783.579	784.586	[M+H]+	ION=[M+H]+	36988	41638					193460	268382		170272		117092		67876	94150	188608		155380	134852	146014	26778
29.6	737.498	738.505	[M+H]+	ION=[M+H]+	19872		50912				29720		32524		32804	19512		22870	28880	4482	41590	30144	32810	11602	22886
29.6	779.546	780.553	[M+H]+	ION=[M+H]+	55600		4770				82982	95652		70224		21628		108898	137082	81018	3772	67556	64238	48056	14710
29.62	238.241	239.248	[M+H]+	ION=[M+H]+	205796		207518	184260	192262	162214	189094	196872	210022	169548			188412	222766	221634	192292	207184	200638	195130	188856	207238
29.62	256.239	255.232	[M-H]-	ION=[M-H]-	54404	51538	95872	65846	70660	46128	92302	130988	110562	44314	63192	85030	113170	118284	128232	127456	109220	113980	120376	80438	105048
29.62	356.165	355.158	[M-H]-	ION=[M-H]-	30206	26162	43322	38718	39894	32774	34252	53236	48294	19962	58884	37268	51610	40408	54922	48266	53666	53864	54620	40098	54466
29.62	512.479	511.471	[M-H]-	ION=[M-H]-	12762	10400	20376	11444	14722	8798	17538	26802	26214	7196	10428	13662	24134	25046	29658	26708	22774	23672	24658	16884	21306
29.62	805.561	806.569	[M+H]+	ION=[M+H]+	44012	12392					302534	347512	4266	144678	1112	40166	52538	88760	111832	230032		212838	190218	144834	28602
29.63	222.16	112.087	[M+H+H]2+	ION=[M+H+H]2+							240656										280494			262842
29.63	148.016	149.024	[M+H]+	ION=[M+H]+	26346	21736	26664	27904	29098	26190	27570	29908	28986	24112	22386	20974	23494	26258	28654	32118	33668	30960	30388	26984	30506
29.63	263.117	264.124	[M+H]+	ION=[M+H]+	183864	143962	194202	191944	202816	192268	193656	189688	196474	174532	155452	153350	172110	184706	190020		199934	200556	210582	190876	209358
29.65	226.056	227.064	[M+H]+	ION=[M+H]+	42768	33814	42194	50050	47584	44484	44026	43430	45486	40018		35040	42032	41904	43098	44408	47750	43786	47202	46482	47504
29.65	333.134	334.142	[M+H]+	ION=[M+H]+	22306	16044	23838	22346	21858	22904	22638	22888	23340	18524	16858	16764	21754	22596	23672	21990	22488	21424	22236	23704	22532
29.66	173.12	174.128	[M+H]+	ION=[M+H]+	35456		36070	41138	39452	38706		36138	38714	33632	29950		32618	34982	33480	38164	39110	37528	38334	41180	39618
29.7	171.108	172.116	[M+H]+	ION=[M+H]+	29410	26330	31754	38388	37856	32386	28432	32366	38862	27464	29012	27144		29294	29878	36580	39462	38060	39848	33874	40592
29.71	438.126	439.133	[M+H]+	ION=[M+H]+	41760	39364	40444	50962	52214	51528	47332	49596	46276	44626	43968	44360	39888	42154	39956	49950	51670	49806	53004	51162	52392
29.73	285.099	286.107	[M+H]+	ION=[M+H]+	38306	48004	29770	46184	43564	46128	34506	32496	29410	40562	43248	41000	36918	29564	26602	31566	32422	27928	33304	43462	31342
29.76	741.531	742.539	[M+H]+	ION=[M+H]+	8040		26978			25620	29236	2732	12528	2984	17844	9770		9468	10158	2068	15546	15494	18498	5430	12098
29.79	805.561	806.568	[M+H]+	ION=[M+H]+	25734		2442				124054	122694		79708		23578		55940	67108	87486		70076	59004	48892	10482
29.81	280.17	279.162	[M-H]-	ION=[M-H]-	3876	3994	4510	38894	37882	30012	6596	5234	5204	4086	4788	5392	5528	3740	4868	8374	9816	9096	28346	25704	26014
29.82	148.016	149.023	[M+H]+	ION=[M+H]+	26486		27186	27136	26780		26532	29604	29028	23806			22880	25924	25740	30712	31072	29568	31470	26384	30534
29.82	282.255	281.248	[M-H]-	ION=[M-H]-	169406	145474	229064	140748	177050	97470	220342	235936	229392	127802	166298	214002	249786	273838	271704	319206	297388	304008	269570	198056	294464
29.82	328.261	327.253	[M-H]-	ION=[M-H]-	30868	26318	41192	26906	32632	18910	36852	36028	34486	22914	27766	32986	42206	41746	44890	46196	41078	42514	40386	30608	37268
29.82	564.51	563.503	[M-H]-	ION=[M-H]-	34602	23466	43246	21930	34168	11314	43138	42600	52672	19310	32238	44198	62242	61800	66230	73490	66222	70442	59466	37594	64718
29.83	222.16	112.087	[M+H+H]2+	ION=[M+H+H]2+		192998		281330	291110	228738			275764	238168			237372				279030		302928	286506
29.83	382.181	381.173	[M-H]-	ION=[M-H]-	58334	57730	65284	55224	59018	42822	59608	63060	61930	44922	81374	61250	70702	57604	63538	64422	65204	64172	66330	61058	59404
29.84	173.12	174.128	[M+H]+	ION=[M+H]+	36638	32782	37026	42200	41474	38292	37550	37970		36528	32828	33022	34676	33738	33266	38618			40934	39388	39240
29.84	238.241	239.248	[M+H]+	ION=[M+H]+	263322	177954	258390	224320	239964	187602	251378	249676	253252	216752		171200	255998	277140	277298	247422	244828	248282	247992	247120	247892
29.85	155.131	156.138	[M+H]+	ION=[M+H]+	18690	16444	19310	20524	20958		19706	19966	20496	18300			19338	19554	19390	20626	19984	20794	21140	21542	21524
29.85	226.057	227.064	[M+H]+	ION=[M+H]+	54612	41082	54486	58648	57810	49490	55558	52398	56748	49296	38478	43200	50696	51754	51566	55186	54060	53170	57002	58010	54662
29.85	263.117	264.124	[M+H]+	ION=[M+H]+	201452	165176	201796	206494	218148	201390	210082	215672	212774	196092	169484	172746	196174	198796	206472	211278	212154	216114	221038	209750	219530
29.86	172.156	173.163	[M+H]+	ION=[M+H]+	26876	23988	25844	28794	30596		27774			25802	25138	25010	26416				27580	28066	28248	28466
29.87	801.53	802.537	[M+H]+	ION=[M+H]+		35340	9646		105368	61744		88418	125292	26198	25706	4776		20852	74886	106598	192210	190714	16434	58104	131590
29.88	132.073	133.08	[M+H]+	ION=[M+H]+	45102	41702	46338	47346	48826	49774	45014	47652	46366	44004	49196	44518	43200	44508	43886	49420	47362	48198	47804	48268	47948
29.88	248.192	249.199	[M+H]+	ION=[M+H]+			20074	20900	22988	20652	20992	21090	20252	20760				19744		20728	20746	20776	22188	21250	21688
29.89	157.147	158.154	[M+H]+	ION=[M+H]+	36510		37698	37542		36818	34548	35882		35092	35330	34790	38066	35754	35838	35978	37144	35344	35444	34876
29.91	135.014	136.022	[M+H]+	ION=[M+H]+	71402	70600	71804	78134	73382	69868	69790	68792	72974	68726	67320	69390	73340	76538	74352	77414	75272	75418	73508	69532	75726
29.92	168.163	169.17	[M+H]+	ION=[M+H]+	57154	54190	59304	61988	58152	57900	55754	58958	57690	58194	56198	54952	57950	60164	57988	59496	59474	59384	57764	57296	63226
29.93	779.548	780.555	[M+H]+	ION=[M+H]+		165858	21888		131900	151882	20768	116708	141920	73078	120470	23780	50792	65518	161718	108340	173696	191596	24076	76366	127732
29.94	194.116	195.123	[M+H]+	ION=[M+H]+	41226	40978	41712	40998	41678	41926	43786	43734	43786	41458	42068	41414	41186	41150	41372	44450	44514	45656	43982	43260	46170
29.95	355.273	356.28	[M+H]+	ION=[M+H]+		26566	27008			30134	30634		28204	28166			27346	27110		28442				28780
29.96	303.292	304.299	[M+H]+	ION=[M+H]+	40706	38216	39140	45638	45350	46394	41810	42212	39270	40996	41934	41174	38354	37226	37572	42788	42108	40010	41168	41976	43764
29.96	1328.98	665.498	[M+H+H]2+	ION=[M+H+H]2+	20052	19854	19580	23356	23510	23566	23466	24000	24244	22916	20588	20212	20072	20352	19870	23114	21222	22356	23152	23126	22718
29.97	227.261	228.268	[M+H]+	ION=[M+H]+	66736	65668	67036	65460	67274	65402	69700	68518	69520	69444	69568	67732	66974	65406	68700	69482	69352	65522	62730	62152	68952
29.97	241.277	242.284	[M+H]+	ION=[M+H]+	63396	64114	63436	56458	58702	58568	61504	64550	64106	61928	65590	62872	66164	63206	63316	61890	62524	61408	56918	58096	60518
29.97	257.272	258.279	[M+H]+	ION=[M+H]+						40628			43224	38132					36652					39490
29.98	143.975	144.983	[M+H]+	ION=[M+H]+	23216	22918	25322	24752	26472	25764	25010	25708	23590	24782	24672	25662	23546	24122	24264	24312	25712	26242	25760	25870	24870
29.98	216.097	217.104	[M+H]+	ION=[M+H]+		65176								63148		67206	68928
29.98	285.099	286.107	[M+H]+	ION=[M+H]+	43182		36612	53612	42652		43612	38526	35008	42688	43566	43620	40844	32816	29398	34244	36122	34096	39812		33392
29.99	283.288	284.295	[M+H]+	ION=[M+H]+	526044	90180	381506	486572	535328	499484	435442	650998	483570	217204	76912	73690	149118	488916	400012	475884	431166	478366	343432	433918	544374
30	157.146	158.154	[M+H]+	ION=[M+H]+		36646							36004												38126
