# Supplementary material for: Maize kernel metabolome involved in resistance to fusarium ear rot and fumonisin contamination
Source: Front Plant Sci. 2023 Jul 19;14:1160092. doi: 10.3389/fpls.2023.1160092 (PMC10394704; doi:10.3389/fpls.2023.1160092)
Supplement: Supplementary file 7 [file Table_3.xlsx]

## Sheet: Supplementary table 3_RILs_10d
Bucket file: Feature peaks detected in the kernel of four resistant (R) and four susceptible (S) recombinant inbred lines (RIL) to Fusarium ear rot 10 days after inoculation with Fusarium verticillioides
RIL					RIL114	RIL114	RIL114	RIL125	RIL125	RIL125	RIL128	RIL128	RIL128	RIL14	RIL14	RIL14	RIL152	RIL152	RIL152	RIL279	RIL279	RIL279	RIL319	RIL319	RIL319	RIL348	RIL348	RIL348
Time (days)					10d	10d	10d	10d	10d	10d	10d	10d	10d	10d	10d	10d	10d	10d	10d	10d	10d	10d	10d	10d	10d	10d	10d	10d
Replicate					1	2	3	1	2	3	1	2	3	1	2	3	1	2	3	1	2	3	1	2	3	1	2	3
Resistance to FER					R	R	R	R	R	R	R	R	R	S	S	S	S	S	S	R	R	R	S	S	S	S	S	S
RTmin	Mmeas	mzmeas	Ions	Adduct
0.75	145.158	146.165	[M+H]+	ION=[M+H]+	35644	31600	31156	28560	29364	32800	34748	31468	15674	5744	17558	25800	7542	13344	22938	20824	13008	30356	13658	11780	16106	18572	18730	10578
0.77	507.168	254.591	[M+H+H]2+	ION=[M+H+H]2+	17648	18964	18300	23908	19930	19254	21608	17978	16748	20066	17842	16332	19398	22938	21812	16930	17898	15744	20026	15490	20060	20736	20544	18142
0.78	387.947	386.939	[M-H]-	ION=[M-H]-	85342	44248	42334	26548	17830	23800	40970	16592	43318	56582	23180	33044	31128	33284	35522	19340	14276	26884	23360	32866	34904	52410	26586	25978
0.78	273.966	272.959	[M-H]-	ION=[M-H]-	171730	111642	99754	71366	52378	61028	95630	52522	101698	130400	70154	92518	86314	91390	92414	64736	48088	72436	60002	83028	83612	114898	76664	65692
0.79	413.048	414.055	[M+H]+	ION=[M+H]+	28980	17238	18166	15696	11380	12686	16794	14388	10510	20764	10580	13430	4806	16458	18736	8656	7078	11870	10012	3932	15122	24250	16342	5518
0.79	297.064	149.539	[M+H+H]2+	ION=[M+H+H]2+	33204	24896	23518	22362	19944	20748	22246	22000	14630	26428	15720	19494	11360	21678	23514	14686	11294	16556	18108	9796	21592	32072	24574	12980
0.79	178.017	161.015	[M-H2O+H]+, [M+H]+	ION=[M-H2O+H]+	22818	18924	22274	21568	21140	20736	20474	19330	19978	19488	16568	18180	14280	21984	20868	18098	14610	18696	19884		25884	23164	24422
0.79	294.083	148.049	[M+H+H]2+	ION=[M+H+H]2+	42254	27822	26910	24780	18078	17036	25400	21750	14544	30294	20708	19800	9886	23122	24988	19492	14112	18246	18152	10330	25434	30572	21424	12714
0.79	199.966	182.963	[M-H2O+H]+, [M+H]+	ION=[M-H2O+H]+	102114	39770	34506	18778	10552	13808	30838	19936	9660	51574	18114	24490		25690	30900	16518		17848	12218		22046	45482	17390
0.79	256.037	257.044	[M+H]+	ION=[M+H]+	40070	30768	29688	35746	29074	29998	31488	29604	21886	32190	22480	25174	14000	28304	29048	20742	15190	24490	27920	12842	31288	42108	35670	20750
0.79	240.992	242	[M+H]+, [M-H2O+H]+	ION=[M+H]+	117090	41006	38980	25148	14082	15896	30722	24796	9588	54594	16544	27016	4548	30774	37160	17014	5304	18864	13668	2210	24262	58376	25680	3672
0.79	279.052	140.533	[M+H+H]2+	ION=[M+H+H]2+			37098					31086						34414
0.79	317.078	318.086	[M+H]+	ION=[M+H]+	55766	38548	40712	39260	32838	39596	40804	35412	25100	45990	28914	30470	15602	36916	38464	25926	18048	28618	30906	15890	37040	54614	41062	20054
0.79	158.551	159.559	[M+H]+	ION=[M+H]+	58828	44286			28016		41746	38134	24956	49738			22208	47262	47030				30130	15982	38922	42244		18834
0.79	150.029	151.036	[M+H]+	ION=[M+H]+	88016	54598	51280	40412	32400	32144	46586	39972	24348	68704		40110	15818	50060	59838	35816	18504	37890	29812	12592	39522	64748	40976	16880
0.79	312.098	157.056	[M+H+H]2+	ION=[M+H+H]2+	88400	58894	58174	55480	41658	47322	57422	50190	33590	68654	39272	47648	24964	51816	55682	44406	28132	41268	43534	23212	55998	69314	50996	27830
0.79	330.11	166.062	[M+H+H]2+	ION=[M+H+H]2+	86204	54336	53356	57972	44804	48384	57016	49554	35138	60652	38442	43478	23784	53296	53960	37594	25740	38498	44438	26130	52408	74376	59666	31992
0.79	299.067	300.075	[M+H]+, [M-H2O+H]+	ION=[M+H]+	88982	61502	60002	54368	42584	49296	61050	54888	35440	66064	40996	47254		54082	58070	41156	29960	40722	44788	21146	57294	71904	54732	25422
0.79	290.046	146.03	[M+H+H]2+	ION=[M+H+H]2+	144974			71668	54746	61318				93968			21628	73872		48852	24772			18422		123148	73702	25496
0.79	238.026	239.033	[M+H]+, [M-H2O+H]+	ION=[M+H]+	136244	102840	103148	101178	81500	83558	98714	92932	64216	108212	76216	82282	45532	91724	95990	75126	58494	77170	81458	42966	100588	121900	98400	56192
0.79	353.125	177.57	[M+H+H]2+	ION=[M+H+H]2+	150714	110272	100068	112868	94658	98300	107450	92472	69104	113398	73412	83788	60144	120606	121496	78398	55576	76340	89594	42720	104278	148700	114968	62328
0.79	335.114	168.564	[M+H+H]2+	ION=[M+H+H]2+	335862	222194	224012	222664	172330	177308	215256	189888	137310	248696	163094	169550	120524	237018	243700	172534	123444	162720	172796	87824	206186	259352	207338	115990
0.79	127.012	110.009	[M-H2O+H]+, [M+H]+	ION=[M-H2O+H]+	1076180	645184	596214	454152	322438	371276	521596	472958	262024	717720	373488	494786	139262	500346	569666	388294		397084	327772	111834	461130	687678	429292	149480
0.79	217.977	218.984	[M+H]+	ION=[M+H]+	94092	36596	34368	25430	14892	18358	31424	23578	9608	50520	16348	23354	2818		32160	16344	4874	17320	14352	2492	22168	63724	25172	5064
0.79	317.102	159.559	[M+H+H]2+	ION=[M+H+H]2+			40806	37556		30786					31346	36860				35246	26390	33606					33620
0.79	139.526	140.533	[M+H]+	ION=[M+H]+	51898			39648	28100	31904	35492		23972	43058	31478	30956	18304		37402	29002	20504	27838	28284	14880	33810	45290	37692	18404
0.79	254.024	128.02	[M+H+H]2+	ION=[M+H+H]2+							443002					401830										646954	391008
0.8	346.086	174.05	[M+H+H]2+	ION=[M+H+H]2+	15560	9972	10340		21318	21292	9870	9990	8662	10636	16356	10528	8042	11530	14390		11338	10198	13522	7946	14368	20022	18546	11370
0.8	148.946	149.953	[M+H]+	ION=[M+H]+	17366	19234	18570	20390	19286	22728	16836	16142	6526	11412	14650	16518	5978	15450	14636	24284	9966	20696	21522	6230	17780	16234	17302	7626
0.8	131.991	114.987	[M-H2O+H]+, [M+H]+	ION=[M-H2O+H]+	44358	28124	27546	19792	14560	17336	22170	19562	12220	33986	18232	21660	6190	18058	23184	17082	10864	16520	15148	5602	20072	26580	20670	7650
0.8	159.986	158.978	[M-H]-	ION=[M-H]-	271098	195544	174848	139410	122012	131386	177874	117408	192902	218972	137574	165230	174360	159810	162380	132028	107772	133228	130542	154282	150564	207678	143264	142970
0.8	145.023	146.03	[M+H]+	ION=[M+H]+		84982	78436				75738	65094	39354		51464	64288			85182			55672	49858		71228
0.8	300.058	151.036	[M+H+H]2+	ION=[M+H+H]2+											33620
0.83	146.106	147.113	[M+H]+	ION=[M+H]+	69912	34514	34972	56478	36492	45762	68626	56692	15266	183202	40342	45462	15250	34676	47032	46894	21504	40882	33992	17664	41604	52020	44600	18540
0.83	129.079	130.086	[M+H]+	ION=[M+H]+	160608	95032	89748	137436	93736	113964	170234	149876	40434	454110	110628	114790	40078	103408	115586	118474	60410	100510	87898	40222	106944	125360	112366	53072
0.84	251.038	252.045	[M+H]+	ION=[M+H]+	18632	14802	15404	14818	16176	14872	16374	18240	15398	13896	12594	11352	24520	18686	16768	9794	12764	10554	13636	16304	14996	20448	18816	20544
0.86	343.991	342.984	[M-H]-	ION=[M-H]-	11154	16188	11972	16154	20834	18716	22432	18214	2202	2028	16904	15794	15320	16774	14468	26468	15554	22558	24090	17902	28180	14204	11326	11006
0.86	260.03	259.022	[M-H]-	ION=[M-H]-	62596	52262	45570	55844	58158	57842	82904	46620	7062	11866	56746	70762	41332	67612	44566	92224	43278	85754	75284	66808	87928	52674	34178	31206
0.87	233.908	232.901	[M-H]-	ION=[M-H]-	24394	16326	10270	9240	8940	12000	10392	5758	32432	56840	12294	16298	9848	13810	9736	13448	7242	10508	12668	12688	9892	14842	8440	6260
0.87	297.889	296.882	[M-H]-	ION=[M-H]-	9462	16558	17020	14220	16562	18474	16728	26676	15574	4912	10540	10380	17310	16544	20452	15184	24864	17528	15882	15034	20034	15220	18802	20434
0.87	109.064	110.071	[M+H]+	ION=[M+H]+	48266	25100	22498	22530	21412	20336	16892	16094	16924	76474	15396	18670	11596	19804	20188	15614	12064	16362	18228	10576	31192	30494	32366	17438
0.87	163.066	164.073	[M+H]+, [M+K]+	ION=[M+H]+	102410	46056		68922	29484	48786	40928	32386	17124	76934	47412	48140	7002	25214	25800	172286	31312	118322	50166	19490	60730	28600	23850	7246
0.87	297.985	336.949	[M+K]+, [M+H]+	ION=[M+K]+	26534	23544	23062	31334	31604	27570	37818	38912	2256	3766	26606	30440	7420	35034	28758	47390	21954	39956	33548	12582	42462	28618	20514	8984
0.88	155.069	154.062	[M-H]-	ION=[M-H]-	42990	16812	11584	12184	9472	10284	6776	5652	11498	76312	11296	16382	8304	11226	9780	8020	6336	8146	9518	9390	12916	17580	16198	11900
0.88	205.879	206.886	[M+H]+	ION=[M+H]+	37378	48118	44180	40576	44160	49216	53894	65232	51956	4930	19312	19022	28628	38146	47266	42748	49136	45382	42262	31090	54714	55364	56302	48864
0.88	181.938	180.93	[M-H]-	ION=[M-H]-	59428	59732	44932	48180	50402	52358	40832	32114	93162	76134	48574	63526	46776	62752	47032	51130	36772	56190	57188	51656	52644	56864	40382	42352
0.88	129.967	128.959	[M-H]-	ION=[M-H]-	63346	71698	73172	62318	66308	67452	83196	93978	91552	26312	48468	54110	71548	70052	71718	75788	86100	72468	71226	66164	77116	78706	75020	79284
0.88	211.844	212.851	[M+H]+	ION=[M+H]+	163152	125446	119904	121916	123112	115462	122206	112616	106500	118852	87782	112184	16356	140656	131752	116612	55384	116196	120538	18494	121632	160372	110818	26206
0.88	121.917	122.925	[M+H]+	ION=[M+H]+	146322	166840	159430	163876	171466	175110	182200	217338	175632	35368	87136	88042	93078	147996	173216	164110	178094	172644	163492	119240	194706	197296	183280	162528
0.88	101.048	102.055	[M+H]+	ION=[M+H]+	528998	280822	264582	507336	244980	358842	320732	252244	173764	492354	287982	301910	100344	164954	179228	932440	281548	772132	378486	187590	421294	204990	165032	144534
0.89	195.954	194.946	[M-H]-	ION=[M-H]-	19910	12502	11646	10180	9680	9780	9836	12770	32748	89112	16962	19084	10522	13756	18472	9580	19410	10242	12264	12916	11140	14934	5362	8362
0.89	111.888	112.896	[M+H]+	ION=[M+H]+	15484	11032	14408	9256	8710	7574	18370	13570	4638	3626	11572	8934	1228	18006	11318	12878	4452	9636	13810	1504	21396	30420	26224	5452
0.9	207.965	208.972	[M+H]+	ION=[M+H]+	187226	93380	62856	41092	17396	27078	54264	38728	2774	11130	42384	37048	9282	21572	41428	25650	11404	18580	16514	8898	22304	38884	18612	12842
0.9	164.96	165.967	[M+H]+	ION=[M+H]+	11276	17676	16622	13396	27352	19378	25988	30720	19660	7692	10606	14374	2624	24326	20230	15116	6716	18430	23558		24294	25880	28620	5904
0.9	180.954	181.962	[M+H]+	ION=[M+H]+	38924	31166	38486	36042	42384	47684	67214	80220	1416	11144	14586	16538	13298	54692	49222	42092	30414	34124	52596	13552	68618	49658	59866	20176
0.91	221.981	222.988	[M+H]+	ION=[M+H]+	119280	91040	69894	69972	55738	78320	99864	70462	3914	8610	46380	54506	11612	49724	70648	71990	23002	55900	44688	16418	39180	63682	58742	21988
0.92	221.022	222.029	[M+H]+	ION=[M+H]+	20640	15076	19976	12666	15070	13132	10498	11056			7616	10686	4398	18382	16790	24844	16758	28252	17782	4056	22270	15844	13502	5396
0.92	299.121	298.114	[M-H]-	ION=[M-H]-	26202	21944	16854	31902	35194	30690	34618	13872	33890	5970	6000	6886	16278	20594	14548	60174	21150	57334	31138	18016	44924	18606	24142	17336
0.92	285.106	284.099	[M-H]-	ION=[M-H]-	32712	20830	22956	25040	30410	27188	34038	19458		3570	6424	7060	22986	24300	17106	28978	16830	29436	34808	24156	55572	25482	30956	22396
0.92	174.111	175.119	[M+H]+	ION=[M+H]+	178364	98060	75494	55652	29604	45030	44938	40022		246670	98438	102162	29022	37048	55464	33878	21510	26542	54318	26140	61444	68310	53536	30628
0.92	173.888	174.896	[M+H]+	ION=[M+H]+	73164	50124	50446	58434	54058	55456	52090	50542	58120	111186	44906	52578	10016	54532	53302	49250	34090	57474	50600	12678	58620	69680	51500	16890
0.92	184.025	185.033	[M+H]+	ION=[M+H]+	255294	147854	122758	113220	70294	121656	152384	106512	7242	30836	81350	86130	31514	83040	118308	115332	39050	80960	64970	32438	63754	107776	81414	32302
0.93	132.053	131.046	[M-H]-	ION=[M-H]-	61806	28904	21040	11682	3522	7596	17676	6390		4044	14010	13626	9914	5162	8592	8538	4612	8690	5474	8254	7302	9738	4850	7130
0.93	170.009	171.016	[M+H]+	ION=[M+H]+	67996	24874	19404	15630	6196	9754	20342	14704		19394	17178	16610	5776	7820	16176	10752	5652	8600	7496	4950	10502	19022	7426	5880
0.93	155.069	156.077	[M+H]+	ION=[M+H]+	44962	21146	17316	17716	19158	18624	11874	13738		75512	12102	16518	9422	15642	16546	10142	8422	11192	13232	7800	21434	32882	30964	15764
0.93	220.034	221.041	[M+H]+	ION=[M+H]+	14928	18368	21004	19926	23084	19332	22896	23924	28870	23828	15812	17986	3552	31784	23526	15088	7524	17976	28024	3154	27498	37808	39438	6910
0.93	103.1	104.107	[M+H]+	ION=[M+H]+	1293832	1226408		1277972	1191322	1312700	1108882	959478	949888	1402622	997876	979998	251876	1035760	909978	1199090	567402	996716	1144090	288886	1439936	1337684	1378022
0.94	350.062	351.069	[M+H]+	ION=[M+H]+	27172	17986	20240	47344	74230	61976	34476	36032	17556	10974	7368	10984	2088	14464	12686	38880	20444	47864	29372	3476	44000	18318	20338	5270
0.94	109.063	110.071	[M+H]+	ION=[M+H]+		19922	18390	16980	20290	17576	11526	12692	10184		11830	16324	10986	18496		10874	10904	11602	14248		25828
0.94	133.038	132.03	[M-H]-	ION=[M-H]-	65366	50748	39978	38762	35444	43130	38908	38804	11086	21122	19516	16634	45384	29000	48120	41218	34868	48422	21734	36940	42552	46716	47810	46892
0.94	326.132	325.125	[M-H]-	ION=[M-H]-	149996	92866	62690	79710	34858	62776	64134	30570	5196	4686	33330	39316	45258	30990	41578	77858	29910	67940	38654	67404	41592	43828	47128	41018
0.94	218.019	219.027	[M+H]+	ION=[M+H]+	59252	33436	40166	39996	40064	32902	48480	39092	20498	16250	15792	18210	7116	35350	29472	46872	18174	49940	47342	6886	82668	64742	57710	12780
0.94	182.077	181.072	[M-H]-, [M+Cl]-	ION=[M-H]-	89028	134196	134012	122924	115464	116878	104522	78526	342002	134810	126532	138158	114880	128090	103452	85458	71326	86270	112648	103132	116220	152584	176074	155072
0.95	115.027	116.035	[M+H]+	ION=[M+H]+	31362	21044	15340	14330	13818	14538	15218	12340	3266	13074	12412	9924	16970	10820	15930	11622	13302	10298	7568	12876	14272	14386	13180	18834
0.95	257.102	258.11	[M+H]+	ION=[M+H]+	17242	13468	12708	27104	28366	27250	4110	4708	874	6492	32660	27274	17072	21684	22040	5202	6162	6296	22718	4432	31296	21666	18476	19774
0.95	196.058	195.051	[M-H]-	ION=[M-H]-	44268	35028	33858	28294	41214	38998	28726	27552	47762	99468	22248	26028	25838	23322	27644	30596	33498	38972	36572	34922	40880	41904	47570	46704
0.95	100.063	101.071	[M+H]+	ION=[M+H]+	85634	63066	51712	51390	31694	48734	49450	41580		16644	44382	43818	37878	32236	54640	34492	27770	29642	25292	44396	24522	43692	36748	35028
0.95	202.045	203.053	[M+H]+	ION=[M+H]+	31346	32506	38114	45126	46050	39692	33480	37628	36752	19214	20836	21466	44868	33474	38486	40638	53286	46852	44430	50842	64178	49298	51278	56004
0.95	228.083	227.076	[M-H]-	ION=[M-H]-	29100	38374	42522	34300	29492	31366	29668	26682	90422	37382	33546	39814	35834	39240	32130	25074	21800	26138	37028	28742	33894	44746	50264	43282
0.95	183.066	184.073	[M+H]+	ION=[M+H]+	48474	48882	63112	45528	49034	40902	26854	34416			28774	36670	33516	47444	54350	68674	77820	79210	51930	27062	72740	54642	45798	34282
0.95	278.04	277.033	[M-H]-	ION=[M-H]-	69518	43020	62078	62760	52208	50524	40460	51172	66100	46244	36680	48418	45974	49288	57036	56756	72098	72886	38088	61942	54890	72362	53254	53250
0.95	147.053	146.046	[M-H]-	ION=[M-H]-	212196	199628	185246	99298	116656	148000	197370	158468	274484	16590	99500	119378	143640	125812	155142	142546	113918	142512	146100	147984	152114	180870	165590	151738
0.95	244.079	225.061	[M-H-H2O]-, [M+Cl]-	ION=[M-H-H2O]-	289254	203268	223962	209550	154416	188020	184894	147466	141402	95380	92636	110852	143868	146844	149976	208560	162754	229098	184434	165072	294844	249036	235446	211938
0.95	129.043	130.05	[M+H]+	ION=[M+H]+	1433384	1077776	907548	795126	619830	873136	931866	778678	326518	269862	722418	725214	618492	598222	972730	631692	500976	610160	493230	715392	496062	770928	749700	671426
0.96	265.116	266.123	[M+H]+	ION=[M+H]+	6704	4290	3528	3708	5398	4086	4864	4018	21710	8678	1500	3016	1156	3106	2256	1576	1330	2312	2492	1366	2612	22900	25612	27910
0.96	110.037	111.044	[M+H]+	ION=[M+H]+	11104	17850	19292	16592	17496	18076	14804	13660	45058	32108	17954	19472	15294	21550	18584	10754	10384	13710	14986	12384	13566	21250	26806	21788
0.96	472.083	471.076	[M-H]-	ION=[M-H]-	18424	21218	23188	24534	26222	19716	22774	17690	27802	1582	19704	21344	19486	25540	18590	21324	20608	27334	27316	25582	25452	20408	21516	23942
0.96	182.079	183.086	[M+H]+, [M+Na]+	ION=[M+H]+	23508	36110	38954	40494	39446	42112	35052	31804	101540	105356	41334	47986	26174	47516	41176	24964	23166	27974	34608	23126	37942	50636	63010	47248
0.96	166.048	165.041	[M-H]-	ION=[M-H]-	130190	103324	81834	69188	71618	80046	58998	47860	77634	222556	59248	70972	47856	50036	46912	83890	64270	103140	73894	82174	93584	67622	57054	55766
0.96	440.091	439.084	[M-H]-	ION=[M-H]-	85136	68154	92984	94254	96764	74656	64160	68572	141270	35836	113886	132760	79014	86552	87024	66336	92404	94556	60598	110312	60402	89546	62470	83096
0.96	180.063	179.056	[M-H]-, [M+Cl]-, [M-H-H2O]-	ION=[M-H]-	323270	225634	221844	223458	160526	187042	201636	154440	185094	106818	101578	124920	142314	150280	145990	234862	174902	264228	195286	188266	305396	238414	254258	224856
0.97	447.159	448.166	[M+H]+	ION=[M+H]+	16806	11994	13912	19582	22542	20586	22248	24850			9008	10694	8642	19768	23694	19266	14272	17560	21934	10668	25240	22088	23238	10328
0.97	831.296	830.289	[M-H]-	ION=[M-H]-		33776	23684	20772	16400	22802	28542	22712			20620	19584	24490	20376	23944	23296	16498	14866	19546	19648	19832	22840	21834	17418
0.97	461.176	462.183	[M+H]+	ION=[M+H]+	14970	13716	13696	27666	35624	30886	27506	27496	10532	5278	12794	13126	10412	24314	24328	31172	20570	31504	20802	12914	24950	22246	26494	12088
0.97	447.158	446.151	[M-H]-	ION=[M-H]-	23374	18398	13662	21938	16858	22086	29764	20768			9596	9528	22126	26002	21110	20074	10772	18380	27980	21416	29754	20512	25246	14344
0.97	722.189	723.196	[M+H]+	ION=[M+H]+	37820	27530	24384	27178	31146	27002	31168	27368	6574	1748	19566	21486	4282	26640	26444	34538	12398	30416	27690	4082	28538	34558	27266	7072
0.97	475.156	476.163	[M+H]+	ION=[M+H]+	38892	38570	30454	38638	44490	37208	28050	30706	3938	5472	14960	11506	19108	28528	42742	32474	23620	33640	22862	18524	38916	46042	34452	28336
0.97	475.157	474.15	[M-H]-	ION=[M-H]-	54606	38464	39306	29826	37114	37696	34286	22358		2214	5260	15128	36792	28812	39684	32194	20830	33406		31630	33346	37416	26842	36240
0.97	431.164	432.171	[M+H]+	ION=[M+H]+	22990	27736	35002	29606	49858	39028	45336	39806	18356	11014	37388	38028	12792	41542	35620	28322	14368	28472	37692	12028	34012	42752	49552	16478
0.97	128.048	129.056	[M+H]+	ION=[M+H]+	23230	37416	44802	40346	35910	41224	30866	31034	86508	73808	41356	43386	29698	43092	39190	24262	26034	27140	34144	24680	37424	46180	60322	50040
0.97	489.17	490.177	[M+H]+	ION=[M+H]+	54282	72640	65982	51356	74692	69400	79128	93852	57158	2110	49982	57856	38832	61078	78664	59152	49044	65380	77650	41730	70158	94372	89152	55394
0.97	782.209	781.202	[M-H]-	ION=[M-H]-	59982	51780	64922	52044	51614	61176	52256	60042	85732	3370	67854	79912	77068	64412	83530	57846	61348	62600	54640	65936	42450	69498	42642	42556
0.97	103.063	104.07	[M+H]+	ION=[M+H]+	44692	110390	84188	67674	101170	100292	134652	95616	311974	454184	51700	97128	43498	69242	86536	25764	23762	35916	56908	43848	50784	155662	166944	113816
0.97	105.042	106.049	[M+H]+	ION=[M+H]+	80394	57794	73186	89650	99724	90760	104660	113382	6738	64826	44398	45578	45346	84920	94340	78188	61266	76876	99706	61268	140874	95980	109952	63138
0.97	489.171	488.164	[M-H]-	ION=[M-H]-	122976	117230	130414	67104	83358	91884	125070	113166	137210	998	75042	85390	121806	105064	116138	96052	69238	94184	98324	114424	102782	123274	105402	110174
0.97	378.093	377.086	[M-H]-	ION=[M-H]-	121998	72250	72326	60798	48644	50716	100470	64384	50634		94570	97278	86812	105774	85092	69524	53796	66986	67056	75902	95960	139274	121344	128722
0.97	380.072	381.079	[M+H]+	ION=[M+H]+	584006	436992	394142	441694	428156	370762	432620	443246	105028	81470	259314	270234	64020	427398	399712	517434	159664	421046	464118	70746	533204	532628	374724	102484
0.98	117.079	118.086	[M+H]+	ION=[M+H]+			72316		11332				12468				8366	11304			36448	48742		9006			73338	49346
0.98	405.112	404.105	[M-H]-	ION=[M-H]-	6952	8054	9716	17438	12162	10276	11214	9618	4732		28122	20722	17712	13040	12480	25998	9456	9406	20998	17306	10692	10810	10320	9664
0.98	1466.44	732.214	[M-H-H]2-	ION=[M-H-H]2-	27122	20490	25828	28740	25446	23202	20354	23902	23174		22104	26750	20904	22438	23042	22508	28418	29136	23806	32634	24304	23316	21442	20458
0.98	440.093	441.1	[M+H]+	ION=[M+H]+	18018	21408	25048	26522	31916	27690	20850	21912	30582	2980	30322	20730	19956	26028	24050	19452	29530	27932	23058	22648	23874	30322	22788	23082
0.98	830.303	829.295	[M-H]-	ION=[M-H]-	72994	55236	38722	42030	23780	45100	46726	24544	2654		39798	41268	27110	26612	40206	36540	17784	30070	25710	37244	18896	28120	23248	25456
0.98	461.174	460.167	[M-H]-	ION=[M-H]-	18480	16724	16292	28866	29490	33102	27462	22884	15680	1772	16742	16652	23464	26918	20542	41304	23864	38246	22288	20452	34770	18090	25120	19798
0.98	1808.56	903.27	[M-H-H]2-	ION=[M-H-H]2-	28698	26024	29620	30338	26812	31160	24550	26382	26446		28272	34178	27290	31078	30118	28822	25890	27216	24738	32866	25384	29594	24356	24550
0.98	119.058	120.066	[M+H]+	ION=[M+H]+	89894	69264	82662	143954	165154	168220	144808	152240	85900	156168	65642	73556	49724	135462	113952	172072	128712	197086	108936	66904	162336	110224	149738	78928
0.98	147.053	148.061	[M+H]+	ION=[M+H]+	487270	549260	611932	400356	595398	561980	707262		578410	86802	436446	461600	288550	524396	588260	472896	416266	576172	565150	323874	630514	711220	817664	463852
0.98	2150.67	1074.33	[M-H-H]2-	ION=[M-H-H]2-	17434	18524	18588		18790	19750	16284		16516		23278	25812	19888		20044	18372	17724	19176		20880	18798	17184	17546	18582
0.99	522.179	521.172	[M-H]-	ION=[M-H]-	25976	17318	18520	16500	11682	13930	15736	12918	22134		10094	13230	13274	14228	13476	16088	14434	18626	19068	16140	25348	19524	18688	17368
0.99	782.21	783.218	[M+H]+	ION=[M+H]+	9098	12618	15438	17024	19676	19500	12268	13540	20844		18690	21066	11992	18636	16090	11610	17210	17464	13504	13522	13098	16258	13650	14090
0.99	1075.34	1074.33	[M-H]-	ION=[M-H]-				23486				20674						23152					18168
0.99	342.116	341.109	[M-H]-, [M+H]+	ION=[M-H]-	244116	246750	242798	295552	276082	291534	257078	224180	177694	6498	292428	293878	260374	278774	243938	241934	221312	248706	296374	262528	307142	288202	283978	266090
0.99	684.233	683.226	[M-H]-, [M+Cl]-	ION=[M-H]-	680834	649210	720838	785878	769274	760610	668614	730676	268582	818	760484	812532	832144	736040	780768	676166	705434	676428	791928	758584	766556	729446	774328	784852
0.99	388.122	387.115	[M-H]-	ION=[M-H]-	994728	954988	908578	994646	992696	989380	970980	861472	649090	27896	956774	990940	963280	1016560	877902	972462	821224	953340	1108312	954826	1084710	982478	995704	949318
1	799.296	798.289	[M-H]-	ION=[M-H]-	19830	33740	24632	24788	26270	22590	16348	15276	14266		28978	22342	20518	25268	24804	27944	17696	24308	34980	23986	32624	19042	28522	33680
1	457.179	458.186	[M+H]+, [M-H]-	ION=[M+H]+	24652	37830	24838	25962	27716	24688	21516	19672	6754	4912	30314	23478	7134	26374	31018	27490	8512	20442	39038	7510	39474	26682	30598	12172
1	133.037	134.045	[M+H]+	ION=[M+H]+	47488	114348	106076	129778	146638	132840	102280	112136	24168	117582	47230	45902	65332	95004	136802	113136	93556	117744	74704	62738	154108	159002	140032	120870
1	730.239	729.231	[M-H]-	ION=[M-H]-	136042	132234	142456	167634	156276	149352	130058	136090	56880		161824	150370	155718	143586	154048	130554	137550	133680	155590	152600	148200	149006	146648	149224
1	197.09	180.087	[M-H2O+H]+, [M+H]+	ION=[M-H2O+H]+	218290	195716	213268	229312	235684	229912	218872	197902	91596	39120	192804		98688	220908	207550	198860	137314	201478	221316	94586	250522	246632	248534	135954
1	1026.35	1025.34	[M-H]-	ION=[M-H]-	236696	208594	255358	269464	251702	266178	220422	259686	47202		262168	260860	294776	245974	262414	211834	245540	212948	263914	263322	279626	256106	277968	265500
1.01	1043.38	1044.39	[M+H]+	ION=[M+H]+	74874	73042	76926	94450	89186	83160	76128	76662	17504		71842	82048	38456	79730	84238	72228	56476	69152	85832	34490	87256	84870	89708	55570
1.01	276.085	259.081	[M-H2O+H]+, [M+H]+	ION=[M-H2O+H]+	68984	67654	71204	82448	86184	83804	73680	73676	32820		70850	70530	39744	84178	77756	67702	52558	67326	80368	37746	83284	85392	85226	50058
1.01	137.048	138.055	[M+H]+	ION=[M+H]+	436962	374920	362422	173088	327236	283076	28614	36810	94294	109928	32078	45668	39504	96334	83156	127580	107898	134166	150414	62666	269660	403922	427028	228290
1.01	288.085	289.092	[M+H]+	ION=[M+H]+	91810	92612	94324	105694	113520	108944	98890	94890	47134	3812	96334	93492	60086	110568	102460	88214	71158	87922	102592	55558	107772	108316	107132	75252
1.01	701.26	702.267	[M+H]+	ION=[M+H]+	108576	114728	116692	146388	133672	126382	114140	119190	30970		114786	121562	52616	122536	122570	111318	85884	109260	133128	54410	132502	129426	133816	87250
1.01	324.105	325.113	[M+H]+, [M-H2O+H]+	ION=[M+H]+	284932	288966	304892	346136	355382	341312	308690	305150	151352	48172	302652	295432	194772	337404	321706	281340	226660	280796	320450	192488	333846	336958	348270	245782
1.01	126.032	127.039	[M+H]+	ION=[M+H]+	465292	427380	455152	529572	535528	524672	471354	476562	220658	59236	439162	465174	322862	495858	502450	435034	354914	442496	501412	320534	492626	537378	532490	373298
1.01	359.143	360.15	[M+H]+	ION=[M+H]+	484850	455250	498110	564098	560964	552390	478350	486024	170962	39326	487028	482658	242488	543158	505436	472746	361734	472868	542826	241044	551694	559248	566416	335388
1.01	115.063	116.071	[M+H]+	ION=[M+H]+	1094570	1517450	1041780	1159372	1284560	1203160	1088232	926464	638964	1880022	1293304	1119960	551308	1206900	1289158	1083438	623578	879502	1505386	619476	1724058	1179932	1392090	928876
1.01	162.053	163.06	[M+H]+, [M-H2O+H]+	ION=[M+H]+	1767122	1697384	1827790	1984802	1993692	1949158	1786306	1692300	751884	175196	1759806	1714734	959562	1935666	1787076	1709274	1278506	1699954	1929222	973420	2020766	1979250	2039640	1260976
1.02	114.03	115.038	[M+H]+	ION=[M+H]+	20750	18016	18378	21782		21252	19452	18434	12396	11224	16454	17486	13036	19662	18688	16196	14840	17942	19698	12526	24554	22644	22174	16654
1.03	133.074	134.081	[M+H]+	ION=[M+H]+	98642	100620	97764	215570	96346	145146	187944	166566	38634	30724	100996	114104	32210	67014	79758	551472	194122	553034	248704	95710	201776	79518	72722	35544
1.03	161.069	162.076	[M+H]+, [M-H2O+H]+	ION=[M+H]+	89900	84260	88004	133066	84852	94548	165990	135260	139780	48902	78706	82212	45962	105188	110802	69058	39302	63128	83580	73030	103002	81316	95570	57296
1.03	108.021	109.029	[M+H]+	ION=[M+H]+	42030	40382	41636	56286	50776	54212	46664	48074	22986	6296	39938	41682	44676		47674	37652	40178	38780	45828	46912	52018	55086	54872	57492
1.03	2186.72	1092.35	[M-H-H]2-	ION=[M-H-H]2-	21750	19920		16532									16794					16382			17752
1.04	1093.36	1092.35	[M-H]-	ION=[M-H]-			20994		17536	17914	18628	7978			15916	15460		20090	20522	20186	7732		18246	17934		24608	22922	23758
1.04	459.195	460.202	[M+H]+	ION=[M+H]+	119650	67010	69080	45788	61246	56482	46720	45604	8422	6862	34796	40620	8158	93272	72982	59054	22644	54122	66412	5472	85782	87924	106720	18282
1.04	476.138	475.13	[M-H]-	ION=[M-H]-	361508	309834	270502	269118	245888	289944	274088	179182			201480	220050	295260	250978	285134	282104	188682	289862	240710	233746	271280	293812	267684	264050
1.05	1008.27	1007.26	[M-H]-	ION=[M-H]-	25740	20236	17986	18822	14544	18628	18328	15880			13956	13124	12768	13124	16358	19660	18606	21182	13442	16424	14598	14334	12422	13924
1.05	666.153	665.146	[M-H]-	ION=[M-H]-	30288	21962	26432	23552	18514	26398	24018	26362			18100	20866	15724	16234	19846	28280	34818	29276	18456	24302	17770	22448	17078	21376
1.05	178.041	179.049	[M+H]+	ION=[M+H]+	32228	25278	21962	20544	26650	25104	32836	38392	1898		15762	17492	570	18894	21860	35558	13246	27734	29096	692	28392	18008	15506
1.05	151.049	152.056	[M+H]+	ION=[M+H]+	25860	25144	21612	38432	28966	31068	25210	20478		361928	40400	32712	6268	22164	27870	15408	5462	13106	22894	3452	23138	22068	20396	5328
1.05	307.085	308.092	[M+H]+	ION=[M+H]+	88064	67410	69336	60294	76082	71784	98790	104998			46046	45592		51320	62858	97414	33466	77922	76622		73272	48582	44066
1.05	134.022	133.014	[M-H]-	ION=[M-H]-	147326	126894	104082	99510	90142	98150	98256	62502	2758	11572	65808	77106	98196	111462	100796	115792	69186	117426	90276	80556	97606	113954	98890	101490
1.06	101.048	102.055	[M+H]+	ION=[M+H]+	108360		42378				60218	50120		37688		62008		25108	30278							30926	180292
1.06	347.063	348.07	[M+H]+	ION=[M+H]+	63142	48552	50994	56374	51274	59314	51158	50832	1536	718	42388	49034	23798	45722	51820	53568	54394	56782	44194	27200	38670	47638	35154	31054
1.06	135.055	136.063	[M+H]+	ION=[M+H]+	50886	142448	130360	168764	170488	145148	75540	60316	114406	653192	183594	176140	71816	118888	151574	50938	51314	59762	129778	41184	112228	168746	141626	112496
1.06	117.079	118.086	[M+H]+	ION=[M+H]+	607094	326642	363162	224462	309802	277750	243434	238686	106462		188458	199796	114558	444460	373776	270128	201030	261308	295798	67932	405352	425880	526174	174112
1.07	324.036				27308	18794	28046	26422	22286	27708	25442	31904			19102	19030	20468	16164	20962	25140	42272	29180	16236	21306	16912	18212	17738	19326
1.07	491.174	492.181	[M+H]+	ION=[M+H]+	44250	30870	31182	35372	31068	32736	40886	35092			23832	24924		22532	24072	30896		22756	29008				32190
1.08	534.145	533.137	[M-H]-	ION=[M-H]-	53930	28266	21988	15178	11202	12182	22684				7964	9910	12976	11926	11316	11854		12280	12564	11956	21862	24516	18816	13706
1.08	149.051	150.059	[M+H]+	ION=[M+H]+	360590	198022	221530	205712	125234	215752	339166	305572		121484	140324	165222		80652	186384	181660		125650	131774		125034	127514	142760
1.08	103.047	104.054	[M+H]+	ION=[M+H]+	132202	76732	86502	78598	47728	82114	135408	142374		118434	57274	62008			80266	70152		54022	50432		46520	41080	54882
1.09	706.215	707.222	[M+H]+	ION=[M+H]+	18360	16702	17638	21020	21688	18744	17618	16672	16132		17000	16990	25352	20776	17192	16656	19536	15100	21728	25996	21622	20602	20956	26062
1.09	132.025	133.032	[M+H]+	ION=[M+H]+	114622	68742	71528	68858	38978	69006	109552	117042		92000	42002	49712		47506	64484	59498		42552	43602		37130	39698	46102
1.09	192.027	191.02	[M-H]-, [M-H-H2O]-	ION=[M-H]-	853126	459958	413570	271330	156476	199732	391856	20848	6988	88078	134882	199656	224240	206686	203864	197884	16268	195418	222788	234000	394496	450962	308628	243182
1.1	523.189	524.196	[M+H]+	ION=[M+H]+	17194	11276	10842	16768	20844	17040	19616	6920		1380	10436	12076	2818	17732	4930	17030		15756	12968		24310	22802	22576	3110
1.12	364.098	365.106	[M+H]+	ION=[M+H]+	109818	108540	111612	127790	129742	124252	113026	105778	89614	3742	107122	108850	145654	125196	110670	99482	100106	95222	126686	143106	127930	128572	137534	131924
1.13	471.159	470.152	[M-H]-	ION=[M-H]-	30462	22990	9830	18314	11788	17112	23352		40146	3734	21674	22686	9620	14904		15192		12140	15152	21122	12886	15390	12272	9284
1.17	456.109	455.102	[M-H]-	ION=[M-H]-	13168	16400	16176	20518	20442	18592	15332	17510			21532	21004	16428	16480	14918	14684	15252	17754	20212	18758	19692	16436	20582	18374
1.23	103.046	104.053	[M+H]+	ION=[M+H]+									51948					55064			17210
1.32	131.095	132.102	[M+H]+	ION=[M+H]+	71340	24600	28600	39466	44662	38232	27986			86804	8252	13692		28136		47456	842	36342	17996		37034	36748	34080	642
1.45	117.079	118.086	[M+H]+	ION=[M+H]+	77870	34104	30288	24450	29046	27976	24486	25984		78708	14528	14260	4300	43528	33476	27008	5680	22088	27708	4378	42690	46188	47866	6510
1.48	324.037	323.029	[M-H]-	ION=[M-H]-	39160	18624	20114	20882	14756	19084	22892				14366	21256	12338	14686	12962	23020		27172	17262	20082	13402	18154	13680	16550
1.49	347.063	348.07	[M+H]+, [M-H]-	ION=[M+H]+	85724	60114	45566	61034	47270	56620	49634	51394		404	36816	40454	18642	48690	49274	45218	35540	50454	45714	24558	50964	48744	38612	24662
1.49	307.084	308.091	[M+H]+, [M-H]-	ION=[M+H]+	109394	84528	56688	63090	69888	80276	102706	117622	856		35622	32770	26334	53912	66218	86752	46590	69772	75210	50648	90642	47320	49352	24376
1.49	103.046	104.053	[M+H]+	ION=[M+H]+	284412	207166	144306	167490	101130	185348	267254	291666	150902	218416	87042	87708	62194	118368	137414	140416	68392	90336	108496	158428	110562	89190	136468	84990
1.5	101.049	102.055	[M+H]+, [M+Na]+	ION=[M+H]+	52458	41256	28884	35342	21022	35408	48356	54004	27094	41640	19364	17722	12158	21084	23906	34702	16038	24120	23096	27352	23196	17960	24864	15704
1.5	178.041	179.048	[M+H]+	ION=[M+H]+	53386	42220	30334	31560	38732	40228	52842	58742		1998	17756	18116	13378	28534	32854	42310	23786	32404	37412	27742	42078	24840	25266	12852
1.5	132.025	133.032	[M+H]+	ION=[M+H]+	217546	159524	109416	125974	80428	139872	202020	222802	114206	160244	65944	66266	50172	86984	108870	105896	51448	68422	82752	116082	83064	70138	102274	60498
1.5	149.051	150.058	[M+H]+	ION=[M+H]+	307656	196200	159252	166162	96858	168220	271324	270532	108338	160776	73596	83138	47726	109734	134486	137470	57772	99910	107666	113344	106396	107438	134246	64238
1.5	135.055	136.062	[M+H]+	ION=[M+H]+	91510	223384	159466	213274	203208	174620	85274	61534	47442	515726	154406	173570	42592	152110	165674	71676	36780	70022	190042	32644	177290	259278	198510	93398
1.52	122.047	123.054	[M+H]+	ION=[M+H]+	52976	39298	49556	60454	45960	41404	46112	52684			102886	41314	8998	44466	41044	56904	30760	52366	48876	11986	57366	47970	30194	13594
1.53	192.027	191.02	[M-H]-, [M+Na]+, [M-H2O+H]+	ION=[M-H]-	590652	322460	312834	170966	94984	129460	274164	217200	1324	14754	45908	99628	174572	119722	179744	139116	104094	150816	115084	148230	237342	286570	196630	191060
1.54	128.011	129.018	[M+H]+, [M-H2O+H]+	ION=[M+H]+	48464	34306	25944	18770	13514	15802	27852	29806		1342	5780	6562	8964	13854	17368	9562	8306	10946	13180	7064	27142	27206	26028	14408
1.55	137.996	139.003	[M+H]+	ION=[M+H]+	30472	21664	18810	11034	8152	9928	17476	19340	1714	1876	4038	4420	6392	8718	10144	6650	6758	9094	8974	5436	18196	16258	14844	9860
1.59	131.095	132.102	[M+H]+	ION=[M+H]+	43588	17240	16556	18500	18272	18644	21298	24588		133732	11926	11986		11802	22814	17456		16394			17674	18810	18216	1064
1.61	129.043	130.05	[M+H]+	ION=[M+H]+	79834	52022	32808	39464	25304	38680	58852	37340	68368	147636	39264	32102	21218	27092	41254	27422	17196	22150	23378	20586	19194	36160	26690	20770
1.84	112.027	113.034	[M+H]+	ION=[M+H]+	28964	20952	19838	13960	11268	12128	17396	16900	4276	66802	8742	9762	6600	13372	13158	11076	9128	9586	13888	6186	15712	25244	26460	19998
1.91	131.095	132.102	[M+H]+	ION=[M+H]+	309454	117012	101764	125766	153648	150192	153990	112240	59468	770718	111338	88336	42072	108760	101864	163106	125810	124062	71592	49738	140732	115936	118958	63386
1.96	130.027	129.019	[M-H]-	ION=[M-H]-	85396	20614	8092	6882	1494		8722				4758	10114		6390		5478		3712	3448	6920	17086	12474	2842
1.96	174.016	173.009	[M-H]-	ION=[M-H]-	191116	48402	16334	14706	2840	5678	15742				11828	17648		12732		13266		10956	8110	14096	35986	28014	7980	13786
2.02	181.074	182.081	[M+H]+	ION=[M+H]+	41190	17310	14688	18620	24908	26078	28506	35132	2996	74428	16282	10850	13264	23250	24880	25200	21164	23592	16146	8096	30388	35964	23888	19860
2.02	164.041	165.048	[M+H]+	ION=[M+H]+	45250	27196	22644	32870	38626	37432	43080	53152		90202	24240	20704		34570	33814		32760	34480	26504		43940	48468	39544	32664
2.02	135.068	136.075	[M+H]+	ION=[M+H]+	57460	31496	26496	35712	44192	46436	51592	58274	3982	115744	28798	21286	19016	39160	43400	45922	37036	39214	29416	12680	49568	56048	45518	37910
2.03	131.095	132.102	[M+H]+	ION=[M+H]+						132344		150952	141308				51788		120358		38602		60140	60552				66128
2.33	130.027	129.019	[M-H]-	ION=[M-H]-	90584	24352	10436	9068	1740	4114	6554	6896		1180	6894	9794	6484	6238	8626	5520	5442	6414	3536	9140	19836	17202	3272	10398
2.33	174.016	173.009	[M-H]-	ION=[M-H]-	198394	53178	25940	21216	4646	8184	16844	11956		3012	17648	23288	12952	16784	19618	13056	12708	11450	8008	20030	41600	34140	7972	24030
2.34	137.995	139.003	[M+H]+	ION=[M+H]+	63186	21242	10122	10692	1842	3920	5172	5998		854	4962	9488	2952	8644	7834	5218	5762	4882	5104	5970	20134	14760	4884	9928
2.34	267.096	268.104	[M+H]+	ION=[M+H]+	188602	103474	79440	55502	18028	23850	47716	33552	2992	8686	25370	55342	7586	44520	58852	30580	18634	21634	28036	11226	79606	105670	56446	48364
2.34	135.055	136.062	[M+H]+	ION=[M+H]+	152866	96820	72122	55292	24298	30232	44520	38606	4520	11420	24108	48160	11442	45642	57906	31998	22598	24726	37516	13638	70040	96144	69456	51554
3.78	165.079	166.086	[M+H]+	ION=[M+H]+	27540	16692	16950	20248	29880	28230	11776	12122	26706	364956	15892	15518	9304	34352	26624	20620	15922	19162	15402	5760	24230	31754	24904	16488
3.78	119.074	120.081	[M+H]+	ION=[M+H]+	106378	63128	59174	78878	115330	104204	44262	40542	96830	1417826	65198	61706	33758	119892	96182	78722	56412	73102	59402	18980	89926	116018	94198	57580
8.42	187.063	188.07	[M+H]+	ION=[M+H]+	126368	57456	64150	38774	30876	30216	26434	19624	42638	257754	37328	39946	14800	58996	63466	26542	11266	20626	32802	6224	67936	74962	78908	29566
9.16	297.089	298.097	[M+H]+	ION=[M+H]+	104148	46276	44880	45318	37736	50526	72598	61430	1270	11170	35652	34658	10642	50364	45392	55622	20974	41508	42942	7550	63972	49688	48694	16094
9.16	135.055	136.062	[M+H]+	ION=[M+H]+	135778	61914	58482	61246	46502	61588	89462	80886	2180	15644	45784	48242	12982	63320	60584	71708	29766	55588	54946	9962	85302	58146	65930	22374
9.35	359.098	360.106	[M+H]+	ION=[M+H]+	17746	11568	10920	11720	21704	17336	24118	21234	12444	4794	4892	4652		13166	10626	25392	12992	22198	18894		18376	17260	21506	7562
9.35	129.058	130.065	[M+H]+	ION=[M+H]+	17742	12352	11484	12036	24354	18306	27580	23794	12846	4822	5892	4900	2886	16304	11126	31470	13310	24354	18470	3460	17456	18432	24240	6788
9.87	207.053	208.06	[M+H]+	ION=[M+H]+	96016	34226	36952	29460	38264	32502	83474	81932	2674	478	13274	16642	5820	26738	22230	57586	23636	48308	39584	12192	66626	55650	50636	18680
9.87	369.106	368.099	[M-H]-	ION=[M-H]-	108312	36792	35680	29256	34036	31472	91446	57136	5682	464	14378	21902	24000	30132	22224	61132	35208	55060	43696	49900	73626	52286	50956	42112
9.88	369.106	370.113	[M+H]+, [M+Na]+	ION=[M+H]+	134028	42276	51896	38504	48212	41276	117924	112670	3296		14604	21508	7152	34462	28674	79020	32920	66878	52414	13966	92172	73990	65542	22444
10.82	545.174	544.167	[M-H]-	ION=[M-H]-	19470	14936	11310	31052	49248	41456	30016	19930	8300	2260	5242	6608	11966	15736	6932	49378	24668	44832	18446	19166	19644	10888	11790	11488
10.83	337.116	338.123	[M+H]+	ION=[M+H]+	15582	11324	7782	29818	37754	34608	26356	25752	3332	1282	5592	5338	1746	14762	7040	36124	14320	30782	14460	4376	15216	11308	13596	2866
10.83	521.151	522.158	[M+H]+	ION=[M+H]+	26762	20884	15256	44804	65222	59184	41318	45776	4922	2270	7860	9110	4030	21978	12342	51774	26044	46446	22896	7842	25694	17840	22002	6450
10.86	129.058	130.065	[M+H]+	ION=[M+H]+	31386	20938	16270	49560	78226	64870	56876	52098	4524	2446	9304	10746	3892	27342	14442	69270	24482	62934	28664	6286	29596	23872	26018	7120
10.89	359.098	360.106	[M+H]+	ION=[M+H]+	10680	8182	7202	10242	18298	13818	20102	20716	2802	956	4060	4054		11982	7094	21138	11730	19416	13218		11946	10710	12754	3974
11	176.047	177.054	[M+H]+	ION=[M+H]+	223990	88568	75988	17398	13354	33746	97696	77938			28156	49802	9160	34076	61176	32910	11062		45548	12730	94132	70622	53358	18970
11	264.147	265.154	[M+H]+, [M+Na]+	ION=[M+H]+	441406	181150	146694	34108	23882	65352	199328	145046	4594	4044	53392	103332	17248	66916	112950	65902	19646	66752	86254	22070	181794	145772	99606	33894
11.84	515.163	514.156	[M-H]-	ION=[M-H]-	18428	11292	9762	7028	14310	13006	20304	14016	1624		4920	5696	7828	13198	7052	35724	17736	28170	26722	11222	27716	16438	17816	17272
12.1	146.035	147.043	[M+H]+	ION=[M+H]+	13310	57696	9732			1854								3712	4616	33354	11016	24932	26706		35762	6646	20354	6966
12.1	494.289	495.296	[M+H]+	ION=[M+H]+	31358	97888	21636		1376		430				650		1650	7200	9000	64674	24748	47442	59578		66092	13402	40774	14154
12.26	379.125	380.132	[M+H]+	ION=[M+H]+	23054	13136	13240	19658	27290	25144	25322	24636	2464	3518	8112	8346	2444	15790	11768	32220	13036	30796	27952	3540	32298	20048	22702	6368
12.26	337.116	338.123	[M+H]+	ION=[M+H]+	28746	18230	15320	24740	33206	26812	29796	29382	2986	3898	8682	10008	2668	17002	13032	41736	17306	36508	36588	4228	40496	24436	30330	8852
12.26	469.158	492.148	[M+Na]+, [M+H]+	ION=[M+Na]+	48752	35658	30442	44732	59310	53496	45512	48136	7204	10114	17052	19998	6950	33894	28630	57296	32570	57098	59752	10840	61270	46948	50784	20688
12.26	515.163				68810	40748	25964	38364	58074	52632	56556	32242	15946	8082	18104	20438	23898	35650	21624	95976	50724	84712	73274	36490	81244	46166	53200	42818
12.27	129.058				29466	17548	14928	21370	30480	26748	28578	26032	3722	3942	8430	9488	2208	17010	13088	39262	14464	34658	32468	4242	37244	23322	28576	7376
12.51	419.106	418.098	[M-H]-	ION=[M-H]-	46960	35506	21846	11346	8178	6776	19862	8702			32146	22676	38524	41266	32046	9740	2456	3152	7852	12416	17172	48898	23640	28672
12.51	395.083	396.09	[M+H]+	ION=[M+H]+	53938	36338	29160	14352	11792	8710	25264	19002			30282	26114	11922	49396	47416	7532	2048	3086	7616	3458	19616	71374	30072	12696
12.52	373.1	372.092	[M-H]-	ION=[M-H]-	21762	19240	11996	6446	4900	2942	10536	4286			16686	15572	20614	19918	16784	4226	1326	1952	4708	6192	8694	25156	10328	16104
12.52	211.049	212.056	[M+H]+, [M-H2O+H]+	ION=[M+H]+	52382	32872	26752	13620	11024	9848	23768	17180			29694	26372	11546	45940	42548	6682			8566		18214	63762	29454	11300
12.52	165.043	166.05	[M+H]+	ION=[M+H]+	55754	35550	28242	13756	11578	8812	26378	18090			32524	28512	11586	50014	46764	8078	2278	3520	8050	3500	19074	71458	27736	12618
12.58	386.12	385.113	[M-H]-	ION=[M-H]-	33782	25372	17288	21942	13162	14476	20136	8636			10560	12652	14626	15456	13128	46778	23458	40494	22114	29488	29892	9842	14286	9696
12.59	206.058	207.065	[M+H]+	ION=[M+H]+	37814	28538	24834	31510	19866	21664	27146	17690			11530	14186	3484	18562	19476	61912	20994	46076	24728	9980	36320	12458	18396	3644
12.59	408.103	409.111	[M+H]+	ION=[M+H]+	72880	64664	57816	66576	54992	55494	63276	45696			35988	40404	14970	49854	53144	81134	46644	70358	57596	31656	73338	43140	54472	17528
12.77	191.057	190.05	[M-H]-	ION=[M-H]-	12214	5388	5000	13444	27626	16752	15954	7252	26518	5112	2050	2568	3212	4770	3530	15396	7916	11768	17320	13908	33816	13090	12770	10406
12.78	145.053	146.06	[M+H]+	ION=[M+H]+		10636	11564	32730	65980	45074	34786	33040	20610	10826	4622	5878	2172	12550	9028	35564	11400	25036	36910	6562	73198	31546	32634	9472
13.82	492.273	493.281	[M+H]+	ION=[M+H]+				23612	44406	38120	30372	9920	2844	12670	20594	12982	544							7276
14.82	433.12	432.113	[M-H]-	ION=[M-H]-	10974	7712	4324	5606	1768	1328	994				4378	2758	3416	6514	4438		288		4424	2860	8224	3418	1320	2216
19	134.109	135.116	[M+H]+	ION=[M+H]+	14724	11580	11084	18494	14474	17642	4622	4348	3344	20554	12038	15492	3392		14356	10510	3220	9342	20422	3368	16006	17572	14078	3982
19.01	390.188	389.18	[M-H]-	ION=[M-H]-	14922	12888	8268	15528	11878	13736	5626	3068	8442	25478	11636	16594	10588	12728	11388	8344	5112	8964	22592	14946	14576	14516	11592	12156
19.01	344.182	343.175	[M-H]-	ION=[M-H]-	22880	17586	13076	27742	18332	24708	6160	3500	11086	29610	17892	20926	14218	20636	15746	14012	7116	13276	33286	23076	21640	21644	16726	17866
19.01	194.13	195.137	[M+H]+	ION=[M+H]+	19524	17216	13732	24904	19138	25174	7330	5760	4494	28402	14924	18430	3798		18618	11246	4500	12626	30142	5048	22758	23480	19296	6384
19.02	366.165	367.173	[M+H]+	ION=[M+H]+	25128	20844	18842	33444	22150	30648	7950	6970	4388	35790	20908	22824	5054	22630	23466	15842	5634	14928	36422	5696	26400	27734	23310	8570
19.39	440.195	463.184	[M+Na]+, [M+H]+	ION=[M+Na]+	44606	45232	30458	85308	34182	115762	4828	2744	1420	18238	24774	59614	2732	13978	18318	39114	12914	33384	37414	5968	52820	66402	21046	7582
19.7	486.196	485.189	[M-H]-	ION=[M-H]-	17998	30706	13740	14332	5718	34998	1244	616	1006	4080	1558	3834	7080	8396	13558	10730	4044	11142	10076	6336	20570	7626	3672	5452
19.7	440.192	439.185	[M-H]-	ION=[M-H]-	32210	45050	20996	21044	9104	70034	3184	1952	930	7704	2374	7660	10090	15150	19618	16846	5978	18852	20308	11276	34150	11446	5590	11354
19.7	902.373	903.381	[M+H]+	ION=[M+H]+	59998	75462	38750	36536	8222	132574							678	19730	33788	21062		21628	20002		61786	15960	4246
19.71	440.195	463.184	[M+Na]+, [M+H]+	ION=[M+Na]+	125606	139338	117638	130464	74446	178258	19986	13916	3580	58262	23282	48730	31034	96198	129052	82754	37026	87870	95616	26288	137772	88232	48052	43696
20.03	830.287	831.294	[M+H]+	ION=[M+H]+	44398	21502	20666	5872									754	3370	6612	9788			6568		13612	1600	1386	798
20.35	380.247	381.254	[M+H]+	ION=[M+H]+	57672	63648	17076	112292	183586	68966	11366	7280	3872	57912	74734	121210	13708		22298	35984	21392	40596	50624	1982	3484	21852	16440	4536
20.42	457.265	456.258	[M-H]-	ION=[M-H]-	37678	20922	12478	24808	19584	22090	10998	6082			27278	36050	26474	30444	29546	14668	6438	13832	42252	24008	81534	16670	9710	13314
20.42	325.225	326.233	[M+H]+, [M-H2O+H]+	ION=[M+H]+	62510	31620	26636	47710	38306	47736	18672	20608		474	42430	51550	10752	58346	65582	23522	6934	19822	63096	6978	125962	34094	25140	7848
20.43	479.249	480.257	[M+H]+	ION=[M+H]+	24374	13062	11032	19058	16176	16898	7862	8226			16180	19754	4992	24188	24436	9398	3364	7848	25562	3590	48158	13646	10598	3380
20.88	355.272	356.28	[M+H]+	ION=[M+H]+	36818	37540	36922	41020	42100	41662	39588	37544	37526	34946	35492	36190	38544	35800	39846	37752	39252	37396	38454	40674	39576	39302	41360	40756
21.29	601.304	602.311	[M+H]+	ION=[M+H]+	128264	12092	26424	3834			3248	2686			6390	6740	2234	2782	7144	1912					5624		2860	2548
21.7	273.267	274.275	[M+H]+	ION=[M+H]+	55122	25036	30132	29162	22044	22026	26356	28220	22294	31178	30578	29528	29340	28128	24748	29758	30830	27574	21324	20924	30750	20068	21758	23416
21.96	222.125	221.117	[M-H]-	ION=[M-H]-	36644	34188	36996	35096	43488	44518	41344	49028	37228	38560	35850	31750	42028	35692	33322	29582	40800	31478	31162	37294	40204	32026	42028	41102
21.97	556.159	557.167	[M+H]+	ION=[M+H]+	42558	36022	34022	10394	5754	9554	41272	23680			8930	9678	7134	29678	29632	9502	6422	8540	40712	5532	53480	12504	9276	5938
21.98	862.251	861.244	[M-H]-	ION=[M-H]-	33638	28788	22676	7052	3332	7120	29424	9368	860		7814	7512	15684	20054	18586	6716	5564	5600	33446	12390	38656	9432	6826	10252
22.03	157.147	158.154	[M+H]+	ION=[M+H]+	44150	41638	46340	49524	59330	55054	50756	53078	60972	39120	43850	44106	67736	42252	44204	39472	56078	41798	41294	61904	46958	47240	49280	61772
22.08	114.104	115.112	[M+H]+	ION=[M+H]+	22638	22352	25478	39164	44500	46554	36378	34464	36392	31106	35968	34438	32598	26192	24824	36418	45114	37708	33050	39668	34660	39680	39356	42294
22.08	248.199	271.189	[M+Na]+, [M+H]+	ION=[M+Na]+	34228	32378	36956	61456	73866	70618	55950	58700	64992	39976	51102	51876	67552	37856	36590	50450	78954	56748	46712	68878	48244	56306	59644	77810
22.09	172.151	173.158	[M+H]+	ION=[M+H]+	14470	14670	15886	21614	23244	23892	19304	20884	19656	18380	22106	22338	19208	15990	17220	23282	29786	23718	20792	19730	21768	22016	20968	21518
22.24	315.278	316.286	[M+H]+	ION=[M+H]+	48600	22042	22952	16986	17576	16406	20424	12124	32590	98070	16108	19854	5806	27154	22002	15394	6452	18246	29234	3666	29244	33188	29010	8114
22.33	458.482	459.489	[M+H]+	ION=[M+H]+	40778	42940	39700	53208	45134	49556	52092	48108	42902	53400	56628	56560	41024	51338	47750	54582	48068	50064	60370	43996	53452	52784	57172	50030
22.59	279.257	280.264	[M+H]+	ION=[M+H]+	4368	14288	10782	10616	13976	10986	8996	4648	99294	164382	21512	18100	3874	17836	15302	6688	3842	7808	20662	1936	17528	18088	15858	4080
22.74	317.294	318.301	[M+H]+	ION=[M+H]+	122822	62754	59496	81820	62138	58506	55830	33218	115528	254922	55646	56872	13404	104978	78016	49622	23562	49090	68560	9650	82630	124366	72760	27732
22.96	244.072	245.079	[M+H]+	ION=[M+H]+	13884	13140	14490	13598	13920	13698	13390	12370	12754	20332	22246	22204	12120	13952	12758	22424	22130	22628	13174	9974	13722	12804	12006	13054
22.97	148.016	149.024	[M+H]+	ION=[M+H]+	50196	49460	55366	54320	53290	49406	48892	47736	46742	87934	87026	89584	44458	57408	54684	94838	83756	80414	54206	43026	49638	51442	49724	43610
22.97	176.047	177.054	[M+H]+	ION=[M+H]+	29328	27688	31286	35386	29076	30710	28144	27582	28538	51942	49490	52552	26516		30404	52634	46444	47626	31684	23970	27316	31066	26804	29258
23.08	310.177	309.17	[M-H]-	ION=[M-H]-	18702	21422	20536	20130	21292	19252	20588	19336	18544	18906	21356	18894	19596	18096	18468	17052	19376	20632	20676	20300	19796	21074	18544	21324
23.08	310.179	311.186	[M+H]+, [M+Na]+	ION=[M+H]+	38254	41756	39952	42902	47090	44530	42208	40340	41646	36292	39946	42994	42648	45108	43006	39400	42160	38598	43160	46412	38370	42672	44074	43316
23.17	337.26	338.267	[M+H]+	ION=[M+H]+	22818	23310	16262	30516	30948	19076	16498	7852	4006	17332	24488	29144	5458	2154	17986	17216	6170	17790	17120		13772	20104	14136	5942
23.17	352.262	353.269	[M+H]+	ION=[M+H]+	27276	21302	23060	6120	5584	5478	3704	3236	4286	1496	8994	10692	2812	13636	10500	10986	4468	8398	9586	1298	10488	8406	6842	2806
23.18	698.349	699.357	[M+H]+	ION=[M+H]+	26524	22188	22186	5672	5706	5368	4222	2940	4324		11020		2592		11594	10902	4504		7658	1028	10124	9252	7160	2108
23.35	301.298	302.305	[M+H]+	ION=[M+H]+	6600	9358	7030	11546	17276	12366	12440	6694	14604	39436	12122	12220	2396	12634	10122	7100	4160	7934	20538	4680	16338	17996	15398	3612
23.37	224.225	225.233	[M+H]+	ION=[M+H]+	35284	36638	34830	35120	35902	36318	33782	35276	37854	37146	34698	33400	35606	36988	35896	35672	36134	32906	34838	33030	34260	35788	36792	34180
23.39	514.544	515.552	[M+H]+	ION=[M+H]+	17184	19020	19230	27362	26130	26852	24834	23072	21344	26442	28562	28958	21302	23386	22182	19918	19542	23240	25534	19448	24482	29320	25086	23538
23.41	517.318	518.325	[M+H]+	ION=[M+H]+	39644	37974	33886	22780	18736	16942	12696	8688	722	1386	22712	23292	5914	27658	24312	19080	7520	14574	24410	3884	22670	23508	18310	5418
23.61	517.317	518.325	[M+H]+	ION=[M+H]+	38872	21360	19028	25622	20252	20142	15294	13012	1858	4132	23248	23774	4140	23540	18530	17092	6204	15600	26890	4290	29272	24528	22810	8750
23.7	554.311	555.318	[M+H]+	ION=[M+H]+	47696	45214	44282	57218	51450	51088	43710	37730	28582	42952	50594	48360	27372	35918	42252	47666	34134	36772	45366	26360	42586	48010	40682	29960
23.7	414.205	437.194	[M+Na]+, [M+H]+, [M+K]+	ION=[M+Na]+	61236	60770	63070	77768	71910	65440	54956	53356	39520	58706	69484	63118	40722	48446	55544	61452	47914	54306	56578	36802	59738	60308	54288	42988
23.71	118.078	119.086	[M+H]+	ION=[M+H]+	59902	60622	61596	74926	70836	68430	52386	45606		66148	78908	69540	28588	39996	46808	66424	43172	51310	55436	27386	56356	60560	53570
23.71	236.156	119.085	[M+H+H]2+	ION=[M+H+H]2+									32036															31826
23.78	292.202	293.209	[M+H]+	ION=[M+H]+	7882	10900	9508	21060	19576	22918	10808	10510	4322	16824	10158	9548	4188	12222	7002	9300	3486	11750	14982	5672	15304	21088	19768	5952
23.78	336.228	337.236	[M+H]+	ION=[M+H]+	28952	28874	33028	41932	33550	48026	20258	24404	11116	54332	34070	31406	8788	28530	20656	37750	10438	21816	46254	7930	37252	55110	39958	11526
23.79	190.172	191.18	[M+H]+	ION=[M+H]+	25024	21810	25846	30770	27154	35298	15552	16914	5996	28698	27256	22376	6560	21256	16746	26642	7244	18076	33002	4686	24436	45614	30108	6172
23.83	262.23	263.237	[M+H]+	ION=[M+H]+	34498	38306	33814	13576	15620	11680	8978	4574	11218	1416	18698	18688	4602	25984	20754	21810	10868	19186	16010	2020	13202	16290	13818	3788
23.83	516.331	499.327	[M-H2O+H]+, [M+H]+	ION=[M-H2O+H]+	48212	52092	48078	17308	19888	17128	10258	6578	16996	1220	24624	24176	5326	33542	27830	31628	16300	24554	22678	2194	19204	24540	17726	5488
23.83	695.411	696.418	[M+H]+	ION=[M+H]+	51160	56826	55012	25046	31384	27448	15002	10554	26812	2104	31598	33430	9616	43750	38910	39188	20408	30688	29594	4346	28826	33200	26400	8382
23.83	724.386	723.379	[M-H]-	ION=[M-H]-	86236	95522	79134	29282	33804	24418	19718	6666	84722		44450	50244	43552	59856	45248	54632	36156	50668	39118	20906	38548	39864	26318	27056
23.83	354.277	355.285	[M+H]+	ION=[M+H]+	92078	102256	96786	36490	39652	34528	23310	13374	33926	3020	48508	49260	10890	71490	58236	61646	29908	53002	44312	5238	40312	48296	35498	11836
23.83	678.384	701.373	[M+Na]+, [M-H2O+H]+	ION=[M+Na]+	84310	94602	89460	43040	49428	43642	26862	16852	43784	3560	56026	54366	16454	74496	66564	64354	37976	55502	49796	6448	46064	56018	46392	14272
23.93	324.09	325.097	[M+H]+	ION=[M+H]+	12068	12052	3410	39124	59936	24092	3938	2644	1642	988	30554	53964	3320		4624	6796	4934	10710	20452	992	1366	8182	6490	1832
23.93	146.074	147.081	[M+H]+	ION=[M+H]+	36966	31852	8326	107184	175878	63300	10100	5906	3908	2410	80978	154314	8664		12568	19608	11472	27908	51726	1878	3430	23154	17368	4058
24.01	477.284	476.276	[M-H]-	ION=[M-H]-	130956	117434	80480	43330	42472	40118	31562	10720	5834	1748	40122	41656	43830	57394	47586	88360	59858	89742	27274	26770	34830	40928	29334	27200
24.01	336.266	337.273	[M+H]+	ION=[M+H]+	132236	107638	87308	44408	45564	43184	35348	22896	3712		32518	37328	10206	60384	60818	90142	44738	82936	30106	6784	32408	46616	32974	10734
24.01	477.286	478.293	[M+H]+, [M+Na]+	ION=[M+H]+	393664	338136	254568	128240	136992	131526	98226	70244	4602	4310	94450	107036	32978	174564	184618	262070	124214	231660	80810	14692	89422	136038	95040	27648
24.07	700.366	701.373	[M+H]+	ION=[M+H]+	20798	22348	19486	15226	15714	12700	12228	7264	17416	1730	17572	19438	4124	24112	18554	15340	6334	10426	17344	2558	18386	24082	22538
24.09	183.066	184.074	[M+H]+	ION=[M+H]+	29898	24332	22722	16438	15416	13254	10932	7310	806	944	12632	12196	2730	17136	13792	21556	7880	17654	13688	2390	11764	13078	11000	2998
24.09	565.336	564.329	[M-H]-	ION=[M-H]-	139002	124320	99180	87088	68528	64708	61400	23258	9606	3382	71922	75644	68162	78440	62002	114306	64764	100602	72482	65306	70526	68624	57648	55612
24.09	519.333	520.34	[M+H]+, [M+Na]+	ION=[M+H]+	872552	744854	637982	529162	432192	435356	339734	231018	16092	16844	356616	363940	90246	464228	412906	653924	246034	507534	418154	71936	336782	395718	348312	103378
24.09	1038.67	1039.67	[M+H]+	ION=[M+H]+	52434	39384	28398	18984	13780		7708	2802			8498	10050			10924	29932	3666		10562		7408	10456	8102
24.14	255.292	256.3	[M+H]+	ION=[M+H]+	29288	29578	27398	28490	26820	31418	30312	30636	30306	32782	34256	33512	28624	30816	31602	32378	33330	31070	29522	29482	29186	28252	30382	28614
24.21	477.284	476.277	[M-H]-	ION=[M-H]-	102076	81024	45678	55896	46232	54834	59440	26548	11408	3990	32870	38922	36668	51186	40280	71366	38208	68142	56132	43106	68786	64314	60940	65676
24.21	477.286	478.293	[M+H]+, [M+Na]+	ION=[M+H]+	301930	202622	169858	197404	171868	190714	199052	156794	11512	13010	115566	125284	28726	169990	145942	227278	74858	177570	166546	28734	208276	217450	230668	73494
24.23	226.057	227.064	[M+H]+	ION=[M+H]+	94832	91678	91320	100740	101020	100034	96054	96432	91474	88152	90828	86002	99180	93064	95014	93174	91344	92244	102976	98766	97066	97828	98724	100300
24.3	565.336	564.329	[M-H]-	ION=[M-H]-	154886	108978	86828	117632	86292	104350	92250	41448	28474	14398	78156	76020	69986	93412	61558	118762	66510	104098	116036	98342	126552	89962	92896	106134
24.3	519.333	520.34	[M+H]+, [M+Na]+	ION=[M+H]+	965270	537694	500822	728368	587232	595902	482620	380394	46004	77032	408744	409284	94002	486928	396778	654034	229610	521926	607198	114714	673784	559046	559838	214176
24.3	1038.67	1039.68	[M+H]+, [M+Na]+	ION=[M+H]+	68494	23152	16906	37480	23378	25208	16254	10276			13154				12634	34040	4046	22566	26864		35110	23502	22746
24.31	103.1	104.107	[M+H]+	ION=[M+H]+	16422	16232	16448	23562	20880	22430	17394	16652	2912	3486	15716	16306	5932	17912	15382	15634	10582	16450	18846	7158	22634	18228	20326	14282
24.36	285.303	286.311	[M+H]+	ION=[M+H]+	40950	44232	43150	48742	49906	51322	54026	51780	46224	49058	56582	54938	45950	52864	48800	54366	48800	51046	56116	44420	54598	51890	50722	47192
24.43	219.162	220.169	[M+H]+	ION=[M+H]+	51754	50768	47182	51254	50758	51302	50014	53078	50352	47226	47202	47946	50170	49526	47754	46240	46768	46006	51748	50318	49778	51238	52254	49002
24.45	283.323	284.331	[M+H]+	ION=[M+H]+	47744	50678	50032	49700	51626	45654	52310	50856	48538	54788	54758	56048	50472	54962	50514	57122	51274	55552	50850	47012	50762	49690	49636	50904
24.49	331.324	332.331	[M+H]+	ION=[M+H]+	216880	161206	189442	208240	159860	185484	174128	138614	109628	137886	108362	137050	100014	134616	131496	185056	148032	165868	169866	88342	201662	144246	136690	103198
24.5	407.323	408.33	[M+H]+	ION=[M+H]+	17494	17962	20426	20704	19572	21122	20610	21412	20204	17856	17026	19420	22588	21470	21362	17470	19692	18154	21840	20634	20758	21264	21236	20664
24.51	366.243	367.25	[M+H]+	ION=[M+H]+	25794	24374	24986	26682	28542	27796	26648	26052	25832	25268	26094	24776	25168	26000	25726	24024	23756	25922	28166	25804	26692	27178	27646	25030
24.51	494.213	495.22	[M+H]+	ION=[M+H]+	32296	22476	2830	22110	64334	14412	2040	1394	678	12202	10436	20964	2376		2740	8620	5592	13350	13654		1170	3818	1626	938
24.58	495.333	496.34	[M+H]+	ION=[M+H]+	69996	34966	36614	47060	39334	38966	31660	25742	6138	12044	32500	32564	8068	46470	32182	49554	16494	38222	32650	6840	42370	40710	45754	19248
24.58	450.187	451.194	[M+H]+	ION=[M+H]+	25818	20834	2218	21658	56444	15332	1818	1364		10034	10744	16896	2780		2718	7964	5490	11754	10636	1186	1460	2984	2386
24.73	453.286	454.293	[M+H]+	ION=[M+H]+	249932	174940	145362	161476	155332	162566	142872	112078	15886	16812	98196	115706	23812	153722	131166	167844	54638	144936	127512	27074	175908	214432	197914	66674
24.74	453.284	452.277	[M-H]-	ION=[M-H]-	72122	61468	37358	44648	39222	38800	37446	17638	12662	5434	33456	37078	34310	45330	29012	50250	25628	50496	40340	37112	47870	55720	49252	53828
24.77	199.194	200.201	[M+H]+	ION=[M+H]+	20190	16934	16404	21326	25470	16312	18338	20388	11370	23198	24690	17352	10212	25608	22182	23354	13454	15880	25836	9210	27000	25714	21318	11230
24.83	990.669	991.676	[M+H]+	ION=[M+H]+	63634	32206	31176	41928	25486	31294	18102	10542			21642	21112		34098	20386	40626	3884	28686	20746		33410	29988	31286	4132
24.83	541.336	540.329	[M-H]-	ION=[M-H]-	131994	102440	82934	103068	80174	90176	76708	38056	29430	23728	84364	97306	82648	101982	74474	112746	61612	104878	86470	92042	116628	97780	94474	99528
24.83	495.333	496.34	[M+H]+, [M+Na]+	ION=[M+H]+	899032	630526	621700	742580	590310	622102	483988	402244	58634	128630	500348	485308	118928	671644	529396	719506	245954	595852	516788	114000	665784	655542	654004	234428
24.84	103.1	104.107	[M+H]+	ION=[M+H]+	18854	19026	17528	26420	26458	24404	17856	18950	3654	4902	16428	16944	6738	19994	18282	17938	9562	18174	18914	7362	21710	20788	23408	14296
24.92	473.887	472.879	[M-H]-	ION=[M-H]-	7014	6522	7200	10394	20560	6618	6630	6992	6818	20018	20468	10668	7086	8848	6322	6188	6048	7386	7258	6438	6856	7212	7164	8014
24.95	248.19	249.197	[M+H]+	ION=[M+H]+	71890	72204	73080	78068	78260	83822	80372	76530	74308	68852	69694	69134	75840	76450	75548	73076	74568	70272	75908	75996	78482	80480	78814	81484
24.97	596.295	595.287	[M-H]-	ION=[M-H]-	121656	102252	69516	35976	43166	40358	43646	18762	17214	2506	28470	44192	24900	37844	34876	73974		67290	27602	20616	29742	48606	52170	39478
24.97	521.349	522.356	[M+H]+	ION=[M+H]+	152992	208684	168908	92802	95698	81476	66560	35322	8756	3842	42462	42106	14340	59130	63708	70082	27114	60154	97010	19248	84634	81640	77870	21004
25	596.298	597.305	[M+H]+, [M+Na]+	ION=[M+H]+	37360	31900	27274				15910	11272	2334		9670	13392	2510	13338	14092	24346	11160	21016	9562	1474	10370	20328	20894	5050
25.01	336.266	337.274	[M+H]+	ION=[M+H]+	114482	92538	77632	46732	52220	53664	45016	32722	6180	3348	27808	39950	7072	44288	42910	76600	31520	61148	30220	5492	30960	62316	61124	16552
25.09	479.302	480.309	[M+H]+	ION=[M+H]+	23104	21374	17946	14882	17576	15842	15114	9452	2570		7430	8458	2336	11344	11744	9336	3936	8660	15458	3462	18336	24516	27240	8880
25.15	354.277	355.284	[M+H]+	ION=[M+H]+	47122	47112	42378	20286	22796	19322	12240	7918	13008		22772	21464	5520	30162	26552	35330	17576	29610	22410	3414	18292	21728	18132	5954
25.16	562.333	561.326	[M-H]-	ION=[M-H]-	46970	48438	37756	22308	17632	15644	11838	5370	30872	958	19382	21438	21038	24470	16704	38426	24140	33386	25100	12236	15504	17518	14252	14266
25.16	516.331	539.32	[M+Na]+, [M-H2O+H]+	ION=[M+Na]+	47086	44994	47012	23506	22190	21720	15242	9492	14330	872	21858	24008	6090	30036	28548	37962	18180	30358	24462	3204	20054	23760	17264	5862
25.19	567.351	566.344	[M-H]-	ION=[M-H]-	26420	22222	16172	17326	15640	15086	16134	5102	6778	1888	10646	8926	11860	11500	9548	12296	6150	11988	22350	22538	27448	17110	18224	25560
25.19	521.349	522.356	[M+H]+	ION=[M+H]+	148950	116272	97470	113908	98826	94884	85352	60004	12650	6604	51052	48162	13982	72418	63596	78938	22580	60486	119324	23178	133354	108372	122902	50272
25.33	225.21	226.217	[M+H]+	ION=[M+H]+	30552	26484	25592	28622	55176	25548	36932	38494	11298	39834	50106	36590	9210	48786	42716	49636	18266	25692	52424	8844	73430	47818	41768	8374
25.36	296.234	295.226	[M-H]-	ION=[M-H]-	30110	11806	11968	12676	12198	11034	7860	6734	142246	274038	11168	8950	10336	14584	6674	12534	6958	11284	19812	12044	15788	13106	13732	16882
25.44	340.133	341.14	[M+H]+	ION=[M+H]+	23490	25500	25852	28818	30184	28836	26498	25766	28454	23258	26424	26718	29128	27416	28328	24844	26062	24892	26394	29526	26712	28276	27276	28064
25.46	150.09	151.097	[M+H]+	ION=[M+H]+	16308	16514	16194	18460	23484	21636	19304	19200	16796	15288	17294	17242	16706	20414	18628	16140	15772	17156	19370	18142	20098	19758	19560	18598
25.52	596.295	595.288	[M-H]-	ION=[M-H]-	59174	20946					14690	6972	10156				4970	7710	5918	28186			9290	4924	11684	22582	33530	33828
25.58	578.286	579.294	[M+H]+	ION=[M+H]+	36510	11598	10564				10060	10888	3192	1050	3270	6348	1008	5952	4564	18912	4458	10096	6928	1162	6432	19168	29508	9814
25.59	451.315	452.322	[M+H]+	ION=[M+H]+	21552	22676	20966	18656	16864	17830	19120	18448	19474	27112	23904	24048	19696	19674	19156	23198	23462	22128	18666	17864	19424	17716	19944	16712
25.59	456.271	457.278	[M+H]+	ION=[M+H]+	25068	22580	25264	21490	22114	20858	20932	22114	21088	24544	25258	25668	22706	22372	22360	27870	25496	25450	19900	21178	20672	21010	20896	20158
25.61	234.162	235.169	[M+H]+	ION=[M+H]+	30360	32068	29718	30104	31322	31722	29858	30348	30846	32110	30824	31364	33362	29778	33560	34024	32760	34058	28868	30246	29388	29296	32172	29886
25.76	427.331	428.338	[M+H]+	ION=[M+H]+	20864	20416	20978	22070	22262	21710	20434	20830	22932	18030	21150	19482	20958	22246	20896	20888	19970	21116	21398	21636	22318	24786	22198	25076
25.84	398.245	399.252	[M+H]+, [M+Na]+	ION=[M+H]+	28302	29856	29220	29746	29652	29648	32700	30110	32876	28080	29026	26196	30040	32210	31676	28848	30492	27496	31208	31818	28746	30920	30920	28342
26.07	319.249	320.256	[M+H]+	ION=[M+H]+	38112	39550	25208	54734	65970	37234	35638	17486	7590	27196	43132	55546	7760	9296	29828	32606	11456	30590	34338	3908	35496	39368	28452	8786
26.18	280.166	281.173	[M+H]+	ION=[M+H]+	19172	20566	19828	19746	19418	20838	17362	18362	17782	20622	21580	39822	18552	16252	16934	20452	19870	22192	18650	16836	18660	19232	19060	19024
26.26	483.247	484.255	[M+H]+	ION=[M+H]+	30376	23738	2832	22968	67692	14036	2338	1182	1140	15954	13836	24322	2898		3506	9890	6294	14490	13098	1140	1200	3168	2072
26.27	394.2	395.207	[M+H]+	ION=[M+H]+	40974	26616	3640	32080	84148	21356	2570	1702	928	19900	15366	29222	3036		5198	11536	7692	18350	15734	1342	1934	5162	1976	716
26.27	488.203	489.21	[M+H]+	ION=[M+H]+	70814	50592	6220	53396	150570	35844	3550	2946	1418	31002	27448	48788	5694		6978	17582	15176	30116	27026	2214	2548	7740	4206
26.36	523.364				41744	29694	23642	26218	29590	28446	22104	14146	4144	4036	18788	15714	3706	20020	16894	18120	6790	15344	18580	5230	27006	26030	29380	9360
26.36	300.134	301.142	[M+H]+	ION=[M+H]+	24372	24282	27176	32408	31540	29616	22622	28636	29354	29328	30654	31096	31452	26458	26200	30252	29764	32780	27738	25858	26696	23016	29118	26388
26.36	148.016	149.024	[M+H]+	ION=[M+H]+	99988	97048	96974	100146	111032	104510	103066	101806	93640	114204	120486	122932	94116	100024	110358	116000	109572	117244	108854	93874	102224	101322	102564	95394
26.5	260.214	261.221	[M+H]+	ION=[M+H]+	24106	17996	19016	18472	29680	15068	22786	17664	6986	25032	24664	20630	4702	22182	22492	26882	10886	15816	25522	4530	33916	26668	21748	5954
26.5	277.24	278.248	[M+H]+	ION=[M+H]+	40246	39520	33662	39744	70198	32684	44204	37154	11734	30936	56448	46876	9684	50626	46258	54578	21092	33488	57278	8654	71514	56986	43444	11756
26.52	227.225	228.232	[M+H]+	ION=[M+H]+	363566	321282	331100	343866	617660	303570	433988	409870	125224	446150	602288	434442	103528	519838	444852	550986	207976	318664	566610	94538	812444	514458	445866	118328
26.56	346.242	174.128	[M+H+H]2+	ION=[M+H+H]2+	22766	23692	22956	29582	30308	29736	26820	25976	27540	19464	21160	21454	25842	25706	24660	20130	19790	18852	29540	27206	29980	29350	32178	28766
26.67	277.241	278.248	[M+H]+	ION=[M+H]+	31796	26330	23906	29694	45798	23628	31562	29240	8402		41946	33288	6992	34160	33092	36622	13704	23246	39978	6578	48426	36752	31026	7268
26.68	415.182	416.189	[M+H]+	ION=[M+H]+	22872	23554	24946	28208	30104	29406	29820	27212	28756	23244	21708	22264	27604	24990	28658	24088	25238	23890	25186	28546	26632	28938	29114	27906
26.69	251.151	250.144	[M-H]-	ION=[M-H]-	21670	22160	22014	17944	19100	16530	19854	20822	18520	18270	19132	16422	18386	19784	17740	22624	22714	22062	18326	18216	19124	16900	16178	15684
26.76	367.418	368.425	[M+H]+	ION=[M+H]+	103406	102018	106350	109334	112426	107174	112372	107080	117574	107406	108270	110076	109138	111694	107314	100710	105630	109860	109268	105916	108788	108240	113276	109910
26.77	374.243	375.25	[M+H]+	ION=[M+H]+	9656	11882	19204	11996	6586	7632	16506	19034	5982	3240	7270	7064	4208	16234	12410	9908	3598	5834	10242	4804	19746	20310	14536	7780
26.92	643.487	644.494	[M+H]+	ION=[M+H]+	21192	20264	21254	24000	25024	26234	22798	22854	21248	19842	22900	21332	21436	21096	21706	21376	19570	20044	22130	23020	24002	24146	27196	24400
26.93	99.0686	100.076	[M+H]+	ION=[M+H]+	14220	12468	14132	13712	20718	11186	14714	14718	4550	14444	19260	15442	4426	16792	14690	17520	7092	11470	17578	3900	22494	18576	16622	5444
26.93	155.131	156.138	[M+H]+	ION=[M+H]+	16160	15438	15300	15852	23310	14256	18154	17472	8232	17920	23922	17638	8648	18884	18402	21232	10498	16094	22532	6662	27008	20832	18466	8040
26.93	148.125	149.132	[M+H]+	ION=[M+H]+	15198	13876	14264	14712	25834	12750	17538	16748	5562	18882	23130	16852	4068	19734	17618	20166	8608	13690	20774	4410	28422	20486	15828	5224
26.93	134.109	135.116	[M+H]+	ION=[M+H]+	18622	17036	15806	20138	30940	17040	21142	20518	7246	22754	28020	20930	5484	22300	24468	24704	9160	16144	28316	4952	32796	23786	23332	5916
26.93	236.214	237.221	[M+H]+, [M-H2O+H]+	ION=[M+H]+	98664	80658	76314	98794	149648	77590	108688	94644	27226	101282	142304	106918	24256	114014	106106	123208	50088	82874	134612	20394	172528	121810	114054	28262
26.93	253.241	254.248	[M+H]+, [M+Na]+	ION=[M+H]+	926946	755468	746928	882928	1471332	732442	1041716	917812	270626	1004888	1356184	1046796	221430	1120320	1048618	1239562	464174	744374	1343690	187548	1661038	1175132	1038016	243710
26.94	126.105	109.101	[M-H2O+H]+, [M+H]+	ION=[M-H2O+H]+	14620	12592	12502	13928	22990	11944	16032	13194	4930	15400	20384	16742	4460	16822	17204	18716	8186	13748	18380	4500	26288	16794	16296	4580
26.94	122.109	123.117	[M+H]+	ION=[M+H]+	17522	14070	16160	16866	24844	14770	19160	19886	5840	18364	23988	20470	5642	21450	20178	21296	9084	13608	23572	3742	30618	21806	17338	5582
26.96	194.116	195.123	[M+H]+	ION=[M+H]+	38128	38166	39116	25274	26044	27116	32144	32170	32978	45278	45740	47074	34078	35840	32820	43104	46744	44706	31998	30362	30486	26676	28090	27060
26.99	599.463	600.47	[M+H]+	ION=[M+H]+	28218	30306	31096	35912	37340	36122	34124	33930	34356	29154	30652	30316	33784	36238	33832	29250	29150	31694	33308	31540	36154	39194	37024	32466
27.01	150.089	151.097	[M+H]+	ION=[M+H]+	55198	52428	52642	45352	45438	48162	56020	54674	55186	57754	56586	55650	55696	58160	56730	54454	54636	53628	54512	51546	52056	47716	48998	48562
27.05	555.434	556.442	[M+H]+	ION=[M+H]+	43400	41132	42958	52802	52046	53556	50342	49462	45298	43384	44758	43498	45718	47002	47102	43128	40672	41980	49616	43906	47020	47654	51730	48228
27.1	241.241	242.248	[M+H]+	ION=[M+H]+	85476	74544	74378	88292	147572	71560	101712	101050	28664	106926	139836	99834	23706	114096	106956	126262	43922	67418	134268	20114	174408	122730	101204	27402
27.12	511.408	512.416	[M+H]+	ION=[M+H]+	57428	54886	54986	65706	65366	66336	64636	59946	61554	52942	57150	58384	59178	61800	61108	55260	50772	53674	63780	59342	59312	65486	63408	60420
27.13	294.166	295.173	[M+H]+	ION=[M+H]+	46394	47860	49438	47882	52538	57964	50944	49148	49994	46316	47676	47044	51002	51348	47240	50152	48244	49384	53488	52836	51596	48452	49300	51214
27.13	478.256	479.263	[M+H]+	ION=[M+H]+	81102	80422	77720	80608	89972	87742	87646	81888	84172	77304	79678	80200	81006	78216	80560	84276	78390	81128	85340	86054	83142	85868	83650	86318
27.18	467.382	468.39	[M+H]+	ION=[M+H]+	62236	63720	61482	72976	72854	73446	69854	70292	62786	56556	66606	60756	60116	66130	64250	59488	60510	62132	66162	64872	68926	68502	66512	65818
27.22	285.099	286.106	[M+H]+	ION=[M+H]+			21506	27402	24138	23410	22872	22814	21650		19854	20436	22596	22020	21400	21162		20358	21894	24422	22290	24520	24886	25910
27.24	406.329	407.336	[M+H]+, [M+Na]+	ION=[M+H]+	42086	40560	42490	53072	47970	49030	45824	46430	46300	39410	42820	39220	44744	46040	46296	43174	41864	40988	51868	40982	48616	48752	47324	45720
27.24	423.355	424.362	[M+H]+	ION=[M+H]+	47364	44294	46264	56850	53820	51170	51662	51522	45826	44002	44080	45878	45502	51700	47552	45022	43638	42888	50584	45938	53108	50108	51162	52376
27.26	241.274	242.281	[M+H]+	ION=[M+H]+	20768	19678	18094	18738	17948	16904	18480	19970	19910	18614	19292	21432	19860	18626	19934	21568		18708	18262		19226	18060	18822
27.26	424.208	425.215	[M+H]+	ION=[M+H]+	43052	40214	44720	46768	49920	47732	43950	47246	42870	41628	40994	39602	44244	47540	47652	40796	39754	38510	44914	42302	44096	47696	47286	43872
27.29	376.226	377.234	[M+H]+	ION=[M+H]+	17382	19080	20490	20416	21808	19930	21350	19474	19976	18086	18838	18590	19198	19100	17896	17232	17534	18650	20768	19744	20000	18968	20080	21818
27.3	308.198	309.205	[M+H]+	ION=[M+H]+	70462	86746	80742	91720	80322	76840	74416	90262	76204	94302	105770	105476	83698	82426	101260	93560	86248	94790	84456	83770	75322	88592	77162	78432
27.3	362.304	363.311	[M+H]+, [M+Na]+	ION=[M+H]+	98534	92764	98166	113404	112362	114004	108542	106272	100180	88712	88554	93898	96826	103842	104484	90450	85650	88922	110844	97370	110288	107750	112908	100870
27.31	759.579	760.586	[M+H]+	ION=[M+H]+	1196	90634			75742	116596		42328	60742	24028	33094		40716	22498	4944	22486	34228	78046	45814	65482	86880	9306	43506	72840
27.34	132.073	133.08	[M+H]+	ION=[M+H]+	40246	36848	40090	44634	43248	45252	39654	40378	42038	35796	35638	37432	38902	39994	38332	39834	36526	37658	39860	38858	42246	45326	43920	41908
27.34	318.277	319.284	[M+H]+, [M+Na]+, [M+K]+	ION=[M+H]+	235716	231590	235360	264754	260440	268186	259854	247406	249268	205606	212266	208112	241798	257448	243110	217076	207930	214028	253352	237346	259378	258660	252906	251076
27.35	150.09	151.097	[M+H]+	ION=[M+H]+	115262	118112	112204	129532	130044	134128	124282	127766	115850	100756	103610	104258	118428	123448	124952	106372	104538	103454	122290	121006	124390	126384	129198	119596
27.37	227.226	228.233	[M+H]+	ION=[M+H]+	37282	38542	38814	38022	36988	33540	38334	37810	34562	38762	37424	40822	36002	37594	39056	39816	37382	38552	35254	37936	36164	34892	36500	34772
27.37	241.241	242.248	[M+H]+	ION=[M+H]+	66534	54308	54880	59800	99804	51734	70276	64240	20128	73166	95738	76598	17112	83130	74694	85788	32726	48912	92276	14880	116826	85386	70676	19202
27.39	274.251	297.24	[M+Na]+, [M+H]+	ION=[M+Na]+	144136	153756	143756	179848	151206	163346	147106	159390	164638	132588	132648	135332	169958	158992	150488	139378	139528	137096	158240	159234	145858	157046	164932	172274
27.4	106.063	107.071	[M+H]+	ION=[M+H]+	121144	131188	122930	134664	128774	136326	127804	132614	131986	115256	118244	117346	137174	134710	126476	124390	119644	131550	130680	132780	132974	126466	133358	136052
27.41	262.23	263.237	[M+H]+, [M-H2O+H]+	ION=[M+H]+	342934	305978	293316	320348	532956	264718	354302	333056	109110	374858	452572	356264	87966	405478	383358	470826	178032	288208	452790	73150	500086	434272	365372	93386
27.41	279.256	280.264	[M+H]+, [M+Na]+	ION=[M+H]+	848702	740538	710438	778342	1322412	635728	870590	810342	240214	903566	1134394	905262	199370	1001746	955294	1180916	420044	688464	1117180	170952	1297062	1040304	889948	218974
27.42	174.136	175.144	[M+H]+	ION=[M+H]+	18394	14722	14160	15642	26294	14732	18352	16874	5960	19370	21594	17974		19414	18282	22026		13556	22266		24316	20864	17584
27.42	146.109	147.116	[M+H]+	ION=[M+H]+	17098	15166	14168	18118	23892	14264	18466	15878	6270	18336	24982	17490	4976	20506	19212	21596	8586	14276	23072	3798	23568	19910	19520	5318
27.42	160.124	161.131	[M+H]+	ION=[M+H]+	17648	16726	16574	18484	28752	15376	19052	18614	6434	19214	27028	19210	5848	21334	21624	25490	9876	15680	23944	5126	26244	23960	17832	5016
27.42	99.0687	100.076	[M+H]+	ION=[M+H]+	19778	17402	16264	17568	28826	15896	21362	17532	7896	18948	25090	20918	6198	21918	21506	25094	10008	16582	24420	5664	28222	25054	18946	6540
27.42	162.14	163.147	[M+H]+	ION=[M+H]+	22224	18562	17344	21774	32116	16796	24168	20792	8362	23214	29166	24420	5690	24872	25680	27364	11510	18374	29596	5070	31590	26254	22616	7622
27.42	148.125	149.132	[M+H]+	ION=[M+H]+	25444		21854	23254	35684	18414	26004	25154	8528	30692	35158	24176	6646	26532	29424	33010	12608	19892	30712	6882	35976	30460	26400	7572
27.42	120.094	121.101	[M+H]+	ION=[M+H]+	24024	20734	19160	22818	32206	20194	25436	22994	7588	26030	29434	26254	5622	27088	25236	29370	11766	18424	30164	5170	32270	27496	24892	6808
27.42	134.109	135.116	[M+H]+	ION=[M+H]+	24648	20288	19038	21268	34402	19378	25746	23102	7760	23046	29214	22588	7992	27720	28240	30774	12060	19972	31684	5194	33702	27278	24452	7570
27.42	197.178	198.185	[M+H]+	ION=[M+H]+	28754	22566	20222	25706	41540	21674	29060	26948	8100	29586	34552	31626	7888	28766	30352	37666	13916	21740	37198	6056	37480	33818	28812	8766
27.42	136.125	137.132	[M+H]+	ION=[M+H]+	29214	24232	23756	27166	40710	24272	29640	27578	8992	32324	36518	29040	8328	30960	29052	38638	13598		38900	5976	39680	33242	28392	7908
27.42	558.513	559.52	[M+H]+	ION=[M+H]+	24178	20238	19286	24454	53054	16358	27138	24488	2624	28088	42502	26920	2180	31534	31424	40760	7480	18150	38950		49674	37544	27934	2504
27.42	169.148	170.155	[M+H]+	ION=[M+H]+	29288	27004	25052	26978	44542	23672	30460	27650	9082	33050	38998	30778	7394	34330	33020	38866	15470	26344	38378	6150	43950	34416	32202	8940
27.42	183.163	184.17	[M+H]+	ION=[M+H]+	29588	25572	27136	27188	42240	23792	30986	28396	8862	32732	40044	30808	8060	34738	31544	37540	15804	25902	37944	5968	43452	36714	30668	8298
27.42	150.14	151.148	[M+H]+	ION=[M+H]+	32858	26752	25862	30116	48208	25844	35940	32046	10056	33680	40834	31990	9094	35918	35486	41550	14590	24330	43126	7562	44038	38714	36184	10230
27.42	122.11	123.117	[M+H]+	ION=[M+H]+	35756	32140	29512	32750	53238	29000	35800	35400	12110	36932	48720	37434	10504	42098	40920	44776	18284	31438	45782	7666	51286	47184	36582	11344
27.42	155.131	156.138	[M+H]+	ION=[M+H]+	38108	32672	33278	36096	54920	34154	39876	35868	14414	40482	51410	42106	13088	42566	41706	48842	22206	34352	51206	10826	55252	48540	41292	12734
27.42	126.105	109.101	[M-H2O+H]+, [M+H]+	ION=[M-H2O+H]+	40678	37694	35904	39734	61062	31490	40682	38532	13262	45834	54962	43078	10990	47592	44730	50736	23410	31840	54090	10048	61712	51206	42932	11652
27.42	178.172	179.179	[M+H]+	ION=[M+H]+	45470	41638	36752	39700	68282	34998	47062	40484	14120	46198	56800	44130	11232	50870	47452	59832	22066	35342	53694	10448	63370	54004	47296	10322
27.42	164.156	165.164	[M+H]+	ION=[M+H]+	50698	43996	44342	46936	77544	43186	55670	48060	15796	57698	71790	53954	13444	57832	57500	66848	27988	46036	66082	12338	76736	61332	55312	15504
27.42	112.084	113.092	[M+H]+	ION=[M+H]+	14950	52034	11552	57132	74818	11912	60446	53924	7716	55790	16136	56104	7730	57996	58452	65976	9204	48408	68002	8756	73050	62704	58812	8948
27.42	113.084	114.092	[M+H]+	ION=[M+H]+	57260	52034	52070	57132	74818	50392	60446	53924	34936	55790	69548	56104	32642	57996	58452	65976	38706	48408	68002	33828	73050	62704	58812	35914
27.47	376.258	377.265	[M+H]+	ION=[M+H]+	15200	27558	31474	36744	20638	22760	35180	30944	19290		13850	13950	6320	31420	21788	32858	8360	15802	25636		55516	37994	37490	15234
27.47	400.28	399.273	[M-H]-	ION=[M-H]-	17692	43618	31862	32300	21190	27670	37150	17348	64082	10930	19152	18272	24180	32228	21472	40822	14434	25612	34642	29254	62872	34948	36420	37724
27.57	440.152	441.16	[M+H]+	ION=[M+H]+	69000	56898	17242	60286	112124	49946	6456	3824		71686	12332	21808	9580		17778	34912	21954	44492	24122			6074	5332
27.58	118.078	119.085	[M+H]+	ION=[M+H]+	34862	32710	9854	34428	58594	25858	5680	4400	2774	39848	8926	11642	7544	3296	10956	18792	12948	25838	16576	2586	4264	6166	5784	3010
27.58	613.477	614.484	[M+H]+	ION=[M+H]+	25652	23086	22690	27130	25446	25948	24970	24088	26632	23310	24128	23850	25082	24122	23670	21678	22994	21492	24842	25226	25982	27206	25416	25908
27.58	558.277	559.284	[M+H]+	ION=[M+H]+	61876	53234	17134	64132	105292	50974	7074	4270	3160	65226	10976	19732	11580		18500	29476	25636	44168	24402	1358	2120	7126	5398	2724
27.58	146.074	147.081	[M+H]+	ION=[M+H]+	195960	178890	47206	192086	363818	152252	20130	11396	7676	217682	38464	59942	29774		54236	95720	62146	134672	75862	3436	6440	19660	15676	5262
27.62	279.256	280.264	[M+H]+	ION=[M+H]+	154130	127828	123012	141882	233604	115700	161600	143134	40882	168624	209750	167762	35594	163034	166230	202538	76920	125240	201136	31882	252798	185942	161908	41396
27.64	434.241	433.234	[M-H]-	ION=[M-H]-	37150	35208	18236	784	412			5742							8406	23078	14520	20126
27.65	494.25	495.257	[M+H]+	ION=[M+H]+	20282	19076	22274	22324	16070	17170	22368	23038	13304	9214	14536	13636	11654	21270	20628	22966	13108	14792	18716	10638	23388	24266	20998	18784
27.65	569.451	570.458	[M+H]+	ION=[M+H]+	31318	30092	29794	34596	35858	35892	34480	34172	33890	29604	29532	29400	32632	32866	33076	28636	29812	28702	33614	33716	31006	35938	34516	36070
27.66	262.229	263.237	[M+H]+	ION=[M+H]+	67094	63972	71166	60984	93158	49660	80952	86440	21752	63516	81502	64952	16838	74368	73036	86866	30214	51330	78484	15048	118006	80232	65720	27556
27.68	400.281	399.274	[M-H]-	ION=[M-H]-	40774	58672	56730	35158	16768	25984	65772	43796	38742	3088	14032	17390	33660	50742	28006	59836	16902	27338	34812	43634	104804	50080	38070	69858
27.69	1118.75	560.382	[M+H+H]2+	ION=[M+H+H]2+	14992	17826	26844	13172	3114	7584	27598	28498	2380		2470	3050		19040	9558	21080		5218	7304		43974	21536	17172	5878
27.69	354.276	377.266	[M+Na]+, [M-H2O+H]+, [M+H]+	ION=[M+Na]+	165966	196456	271042	151498	60970	104354	282094	302704	49550	9496	46584	50076	31750	226058	145386	216694	37348	68058	104624	32920	432178	237580	181446	95292
27.72	525.424	526.432	[M+H]+	ION=[M+H]+	37704	35740	34902	44410	42280	44820	40614	40014	40562	33970	36756	34590	39038	39022	40168	35080	36038	33890	40694	41362	39784	40094	41324	40774
27.72	514.128	515.135	[M+H]+, [M+Na]+	ION=[M+H]+	22674	17626	7524	57406	95566	33974	4580	2078	1710	19248	32956	57178	4730		8652	14440	11160	18740	20026	1086	2706	9284	7110	2274
27.74	278.223	277.216	[M-H]-	ION=[M-H]-	63152	19260	21234	9684	5108	6788	16860	12396	52790	15740	12210	11072	10486	22338	11062	9048	3292	5016	13480	14336	28372	21240	16966	30294
27.75	250.229	251.236	[M+H]+	ION=[M+H]+	15140	14432	12584	14170	25656	13838	17424	15902	5062	17616	23848	18328	4348	18458	18930	22146	7680	13168	21176	3472	28696	19042	17860	4624
27.75	267.257	268.264	[M+H]+	ION=[M+H]+	174716	149972	153018	174088	275434	138812	189024	170148	53604	186886	253324	193350	42618	204568	199186	237612	85690	141728	246714	32788	307140	224222	188114	45354
27.77	428.254	429.261	[M+H]+	ION=[M+H]+	23956	20776	21552	23310	23442	23018	22036	23706	20334	17574	19126	17658	17810	24708	22572	21978	17242	17766	22976	17012	23482	24898	25144	20126
27.79	481.398	482.405	[M+H]+	ION=[M+H]+	36046	35634	35866	41156	43582	39626	37078	37190	38854	33416	33772	35224	37744	36348	37676	35364	34280	35226	41284	38002	38126	40386	40230	42362
27.82	194.116	195.123	[M+H]+	ION=[M+H]+	49022	48254	45640	39844	43650	42626	48254	47328	44654	54228	52674	55284	44864	46538	46802	51124	51594	50374	44570	43882	44348	42550	41396	43806
27.85	359.055	360.063	[M+H]+	ION=[M+H]+	33660	33066	34648	37150	37150	35680	33680	36458	35066	34200	31726	31846	33532	37004	37818	33080	33396	31842	37980	33876	33058	36912	34980	36020
27.86	613.476	614.484	[M+H]+	ION=[M+H]+	26882	24292	25982	29204	28550	30092	26712	28752	26522	25172	25872	24430	25130	25560	26530	25186	24746	23086	29348	25382	27694	28264	28842	27230
27.87	150.089	151.097	[M+H]+	ION=[M+H]+	105114	105942	109916	70844	75118	75680	87210	91364	92726	118112	121160	122664	88180	97696	92824	116596	117094	113610	86096	80182	84736	77690	78372	77414
27.88	162.03	163.038	[M+H]+	ION=[M+H]+	17848	18752	16752	21708	19828	18584	17840	19168	18684	15418	15670	17132	16456	19266	19660	18744	17498	16170	20002	16964	18018	21640	17616	18520
27.93	569.45	570.457	[M+H]+	ION=[M+H]+	36026	35978	36166	44222	43834	45058	41204	40304	40198	37552	35940	36230	37008	39910	39292	37278	38298	37114	40728	40464	38618	43990	41032	41966
27.95	106.063	107.07	[M+H]+	ION=[M+H]+	31460	29444	29516	26326	25428	25482	27142	29380	30784	31094	29722	30364	28530	28758	27812	27918	29132	29072		26614	28538	26310	26182	25740
28.01	525.424	526.432	[M+H]+	ION=[M+H]+	51530	50278	51294	60262	61452	59650	58310	56682	55476	51816	50182	48644	55878	59560	56038	50682	49622	49806	56732	54266	55850	62372	57530	56544
28.04	155.131	156.138	[M+H]+	ION=[M+H]+	44540	46070	47734	47976	51452	48968	49532	48962	48176	41888	42988	44722	48808	50112	47870	45684	41730	47660	49642	44584	51422	50984	50284	47108
28.04	255.256	256.263	[M+H]+	ION=[M+H]+	62194	59362	56224	61388	100158	51404	72050	61342	21748	69558	93954	69652	19098	79568	72056	90470	35256	53176	89362	16052	116504	85156	71232	20690
28.08	481.398	482.405	[M+H]+	ION=[M+H]+	60472	61090	60224	70866	72266	68380	66270	66040	62722	62180	59984	57112	63168	67154	64750	62562	60496	57494	67298	68284	66980	70310	67778	67650
28.14	420.344	421.352	[M+H]+, [M+Na]+	ION=[M+H]+	38038	39580	41184	43678	42126	42822	42382	43516	41784	36134	37970	37822	39384	38286	40026	39594	38812	37250	41650	41300	38748	43846	40786	42756
28.14	437.372	438.379	[M+H]+	ION=[M+H]+	54738	52320	51708	58116	60464	58408	57252	58778	55254	50480	48874	52470	53772	54880	56870	50066	48730	51246	57710	53140	57204	56668	58770	58490
28.19	173.121	174.128	[M+H]+	ION=[M+H]+	99796	96180	98992	103992	108290	110022	102916	108414	104628	98490	98274	102404	103260	105672	102462	100604	103474	99868	100184	103426	103800	104476	103724	106424
28.21	393.345	394.352	[M+H]+	ION=[M+H]+	23394	23296	22900	27804	27656	27266	23928	25170	25946	22144	22696	21354	23304	25012	25564	22280	21310	22320	24942	23482	25702	27192	26986	26372
28.21	426.239	427.246	[M+H]+	ION=[M+H]+	48320	45550	45898	43626	52440	48598	46412	47864	46708	44594	46458	43240	49000	52520	53778	46354	44388	46438	46166	39232	48928	49056	47666	43534
28.21	376.318	377.326	[M+H]+, [M+Na]+	ION=[M+H]+	102170	99004	97066	117786	113018	117602	106636	112438	107406	95700	91984	93158	103960	112244	111606	94410	94494	98746	109028	102012	106388	113182	110526	108604
28.22	126.105	127.112	[M+H]+	ION=[M+H]+	54728	52778	52588	62208	60730	63990	59702	57318	56434	51348	51934	48390	52318	55062	57454	53752	48362	50788	59088	55192	62594	63056	61368	60418
28.25	332.293	333.3	[M+H]+, [M+Na]+	ION=[M+H]+	107872	108588	107684	125382	121452	123052	114668	116614	113596	100430	103402	108674	109738	114202	114864	106490	100376	106326	121892	115220	118510	118496	121430	114420
28.25	255.256	256.263	[M+H]+, [M+Na]+	ION=[M+H]+	1382998	1226790	1158428	1160338	2074696	1029934	1453700	1264290	329780	1519202	1957060	1396992	328298	1585158	1496962	1834786	668064	1145270	1661630	269040	2275090	1605754	1399798	347296
28.26	150.089	151.097	[M+H]+	ION=[M+H]+	65974	64744	63926	74070	79656	76652	73438	73668	72132	66840	63588	66430	67682	71698	69318	63132	61262	67336	71708	65802	70898	77276	76022	71312
28.31	400.017	401.024	[M+H]+	ION=[M+H]+	17928	17336	17874	20044	20154	20074	17614	18484	17964	16740	17002	17546	16716	18716	18098	17592	18058	17898	17688	17646	19018	18870	17684	19230
28.31	738.112	739.119	[M+H]+	ION=[M+H]+	22992	21904	22340	23688	28618	24838	22822	23050	22054	22084	22416	22516	22646	22576	24392	22426	23084	20878	24516	22614	26458	25552	25642	24588
28.31	288.265	311.254	[M+Na]+, [M+H]+	ION=[M+Na]+	41972	44402	43944	31246	46264	35862	34988	38354	37138	40770	42424	43628	44374	49048	47542	40644	43500	40364	35126	31668	36024	34954	40134	39004
28.32	115.046	116.054	[M+H]+	ION=[M+H]+	17826	18270	16516	16608	19318	17214	17056	17602	18796	18042	17482	18354	21222	18636	19826	15818	16730	17040	15436	16194	15676	16864	17400	19492
28.32	106.063	107.071	[M+H]+	ION=[M+H]+	36930	38876	37838	40814	41316	43640	40938	39696	39566	34536	34400	35270	36200	37598	37222	35184	34710	34764	40562	38192	45880	42556	43138	40904
28.32	171.108	172.116	[M+H]+	ION=[M+H]+	40334	42472	39058	30534	45424	36276	32556	35052	36872	39212	39582	42280	48472	43784	43486	35938	40630	36052	30864	32184	32520	32204	35120	39132
28.38	267.257	268.264	[M+H]+	ION=[M+H]+	31784	31250	27190	28504	56190	24620	31004	29664	9420	33936	46990	36630	8392	39494	34474	42038	15440	25012	39714	5106	54796	38512	33102	8560
28.39	216.095	217.103	[M+H]+	ION=[M+H]+			26320	23206	25506	25216	24894	23784	24656	25054	27120			28074		25884			24284	23818	24482	26026	26582
28.43	804.046	805.053	[M+H]+	ION=[M+H]+	15288		15318	22666	5428	18804	20918	19932	19534	12058						15510	2684	13386	19820	22002	19218	22834	19166	15210
28.44	2388.65	1195.33	[M+H+H]2+	ION=[M+H+H]2+	5414		7292	22058			28986	22566	20128	4486									22334	24108	12770	21994	9776	5026
28.57	378.279	377.271	[M-H]-	ION=[M-H]-	46954	43882	46726	44884	43960	38830	40516	38446	42204	57164	54434	56282	51672	50954	48300	46708	44956	49048	48048	50716	46272	43506	51748	41210
28.57	238.241	239.248	[M+H]+	ION=[M+H]+	2256514	2393170	2377216	2378124	2371296	2526612	2298006	2339646	2219580	2229606	2197620	2277258	2254224	2377474	2352514	2235362	2223962	2339988	2189020	2119400	2252882	2379748	2411096	2213976
28.58	1462.28	732.147	[M+H+H]2+	ION=[M+H+H]2+	8406	16798	6930	8574	22060	11358	8054	6384	1396	9084	14510	23064	2586	19958	18520	9354	4594	7594	12060		14444	12636	12104	2392
28.58	845.068	282.697	[M+H+H2]3+	ION=[M+H+H2]3+	25054	24526	16830	19794	54998	15870	23654	21932		28002	39732	28540		30086	27650	33490	6348	13970	39598		45294	33496	23898
28.58	376.281	375.274	[M-H]-	ION=[M-H]-	28252	43882	40178	44884	25006	24088	49738	28462	42204	16024	28158	23950	51672	50532	48300	57458	18894	27452	43292	50626	69564	44252	49250	44520
28.58	281.733	282.74	[M+H]+	ION=[M+H]+	43216	42302	29612	49108	92892	35278	47630	40344		47936	69148			63326	59742	60140	9028	28030	74726		80440	69612	54098
28.58	844.453	282.492	[M+H+H2]3+	ION=[M+H+H2]3+	48902	44590	36008	65590	95046	51828	63532	59314		47824	75480	51952		71394	68570	70150	23346	31474	82058		74042	80100	68434
28.58	281.272	282.279	[M+H]+, [M+Na]+	ION=[M+H]+	7718596	7301472	6408518	7348210	10005556	6508132	7676818	7353180	2702460	7882004	9243304	8428710	2363034	8435214	8416784	8833000	4514486	6385814	9024208	1915402	9898868	8689012	7923378	2643606
28.58	281.4	282.407	[M+H]+	ION=[M+H]+			29886		64648	34796	38008		11050			35516	11366			40968	17532		49462	8202	61246	48872		12036
28.59	374.294	397.283	[M+Na]+, [M+H]+	ION=[M+Na]+	23072	23366	23054	25246	23046	26256	22144	22418	21182	19688	20768	22052	24652	22206	23658	17900	22068	22438	22102	21594	22074	22520	23800	22664
28.59	190.171	191.179	[M+H]+	ION=[M+H]+	18794	19024	16876	18100	24196	17686	18252	18840	7898	19394	22502	21922	7158	22460	20934	21152	11972	17416	21186	5644	23174	21320	19248	7458
28.59	176.156	177.164	[M+H]+	ION=[M+H]+	22944	22990	21174	23360	32748	23196	24220	24322	9222	25908	28574	25760	8858	26074	27068	27260	13158	21486	27504	6826	32582	26126	27160	9494
28.59	402.297	401.289	[M-H]-	ION=[M-H]-	12256	22780	18482	15514	12426	12922	24380	12820	29190	12292	7762	7284	20254	26398	12266	23910	8310	11634	22190	26274	50420	22134	26470	34258
28.59	164.156	165.164	[M+H]+	ION=[M+H]+	24708	24436	25150	24692	33400	25200	24370	25706	9406	25052	29906	26418	9220	27310	26360	30560	15828	24334	29228	7494	33670	30344	27342	9642
28.59	124.089	125.097	[M+H]+	ION=[M+H]+	24286	22366	21000	25412	32600	22596	24548	24456	11086	25048	28700	25290	9938	27968	26356	28138	15280	21480	30952	9692	31758	27522	26794	11414
28.59	110.071	111.078	[M+H]+	ION=[M+H]+	26796	26900	24900	28420	36478	27406	29730		13326	28126	32770	31832	13520	31270	30354	33072	18960	23862	34314	10080	36900	31492	29540	14270
28.59	136.125	137.132	[M+H]+	ION=[M+H]+	32664	30142	27466	31122	38834	27714	33084	28530	14260	33228	36762	32476	14040	33098	36096	38264	20282	26388	38432	9008	43968	35914	32768	12268
28.59	150.14	151.148	[M+H]+	ION=[M+H]+	33184	32648	29780	30520	41492	30440	33340	31674	13790	31710	38030	34580	11570	34672	35906	36408	18996	29316	37194	9580	41292	37434	35872	13556
28.59	99.0688	100.076	[M+H]+	ION=[M+H]+	35464	33148	34516	33994	41312	31662	32392	33368	16180	34644	38660	34076	17078	35626	34936	37772	23912	30756	39968	12750	43044	37212	37388	15800
28.59	138.105	121.101	[M-H2O+H]+, [M+H]+	ION=[M-H2O+H]+	35852	34872	33256	34762	48694	32178	35722	33692	16460	37504	39728	36298	13764	36954	39340	38918	22334	29364	39426	10622	42774	41390	36932	14202
28.59	122.109	123.117	[M+H]+	ION=[M+H]+	36116	35610	31932	37668	46050	31990	34674	33760	17024	37436	43682	37828	15194	38984	38950	39850	22998	32602	42868	12310	47218	44306	36228	15240
28.59	162.14	163.147	[M+H]+	ION=[M+H]+	37644	36352	32468	37608	50578	31242	36338	35990	16516	37870	45134	40496	14688	39786	39992	41890	21854	32206	44472	11260	47678	41406	36386	15572
28.59	225.21	226.217	[M+H]+	ION=[M+H]+	38486	38044	31286	39696	49230	31840	36142	34964	14678	39698	45206	40290	12536	41310	40474	42428	21924	30144	42874	10818	47150	41174	38760	14226
28.59	562.801	282.408	[M+H+H]2+	ION=[M+H+H]2+	35510	31412		39552				34176		35998	46202			41430	43342			24828					41408
28.59	108.094	109.101	[M+H]+	ION=[M+H]+	41456	39282	39332	39310	53588	36698	39306	38770	17322	42340	47326	42430	17376	44444	43838	47692	25618	36174	48006	12916	52594	46736	41188	18224
28.59	211.194	212.201	[M+H]+	ION=[M+H]+	41818	39286	37042	40370	58632	38620	43836	38958	16700	40898	51216	43660	15822	46094	43798	46204	25428	36822	48796	11494	54998	47592	43320	16424
28.59	197.178	198.185	[M+H]+	ION=[M+H]+	46354	45144	43274	43310	63938	40704	46748	45734	17446	46164	55842	47556	16932	49782	49768	47646	27112	39600	53642	12458	60330	52082	47542	18002
28.59	183.163	184.17	[M+H]+	ION=[M+H]+	51312	48800	45188	51372	69888	43082	52992	47826	18466	52574	58830	56450	18858	56828	52504	56798	29312	43634	59488	13960	67228	60230	51158	17794
28.59	166.136	149.132	[M-H2O+H]+, [M+H]+	ION=[M-H2O+H]+	55168	52902	49722	53940	70900	48330	55856	49922	23348	56616	64640	59838	19710	57614	57232	58822	33892	47306	62972	16442	69392	59012	57866	22018
28.59	169.148	170.155	[M+H]+	ION=[M+H]+	51482	53294	46980	52456	72672	48634	52988	51572	23524	55778	63670	54606	19900	59272	59656	61232	30352	46166	62900	13542	72050	58348		19628
28.59	152.12	135.117	[M-H2O+H]+, [M+H]+	ION=[M-H2O+H]+	59858	56680	53174	62374	78878	52894	62016	58340	26922	61596	67460	65292		66166	63286	64660	37404	52764	69686	17238	71810	72034	62168	23982
28.59	352.259	353.266	[M+H]+	ION=[M+H]+	31122	69100	41772	26568	18656	25952	38350	50374	7056	6094	14818	31588	13420	80152	48590	35170	10856	13314	17572	5834	62374	43686	35364	26348
28.59	155.131	156.138	[M+H]+	ION=[M+H]+	81334	84890	76966	86216	101168	86612	84028	82850	57480	81850	91220	87314	52776	96140	87800	86344	60934	73704	95616	52096	99608	95622	84336	56374
28.59	264.245	265.253	[M+H]+, [M-H2O+H]+	ION=[M+H]+	469102	468536	409578	445428	630190	409154	463606	441382	182858	479646	555348	503192	173722	510872	517646	524272	285180	409264	556562	132330	589786	526908	479706	176410
28.59	562.544	563.552	[M+H]+, [M+Na]+	ION=[M+H]+	575568	518594	448458	525484	974786	428254	592440	547112	111042	623672	794138	638622	82796	687910	678222	764570	219280	417410	785226	56836	972578	736844	589700	94280
28.59	124.125	125.132	[M+H]+	ION=[M+H]+	30428	32234	31372	32140	43008	31804	32442	31932	15296	32796	37132	34074	13336		35386	37374	21192	28050	38338	9894	40812	40224	36270	14172
28.65	426.239	427.246	[M+H]+	ION=[M+H]+	29698	36314	33104	40930	39262	44520	35548	36144	34884	32586	35688	37912	42130	39546	41780	20274	36190	33304	40108	32086	32748	37402	41336	39648
28.65	781.564	782.571	[M+H]+	ION=[M+H]+	984722	68722	758644	780066	208894	611170	972484	806084	710180	668934	341228		142098	64010	115768	818574	349420	576344	787630	792966	709128	781184	602068	417496
28.68	280.239	279.232	[M-H]-	ION=[M-H]-	927486	213338	255440	175268	112212	119726	211688	160644	482172	198152	120198	126142	146092	233014	127904	200172	72152	112534	155298	163198	369762	247134	187830	403484
28.69	326.244	325.237	[M-H]-	ION=[M-H]-	93630	26464	32810	20640	14672	16008	23554	19018	50160	25670	20080	16800	20350	27624	18790	24270	11734	18052	21432	21596	39176	27674	23816	40574
28.69	194.116	195.123	[M+H]+	ION=[M+H]+	32928	34182	33664	35516	36270	37122	34722	34424	35886	33576	33530	37200	37674	37554	39680	32480	36282	34978	36486	36172	35520		36982	38110
28.69	560.478	559.471	[M-H]-	ION=[M-H]-	247680	45242	56906	29150	21956	19988	45584	28980	129686	34990	16108	15910	22288	41986	21866	49704	12840	21040	28194	24524	87880	50576	30780	94924
28.69	380.164	379.157	[M-H]-	ION=[M-H]-	57150	48814	47080	28294	16170	18512	29360	29954	57724	67894	57128	52430	66228	69906	31246	36260	5236	17442	25146	63986	64552	47814	72078	66918
28.69	263.117	264.124	[M+H]+	ION=[M+H]+	123254	111616	112882	101994	88784	101812	105286	110862	107174	90430	87542	89254		116948	101806	102094	82054	84634	97874		124570	111344	110202	102794
28.7	781.564	804.554	[M+Na]+, [M+K]+	ION=[M+Na]+	548214	22904	651366	160286	17754	95146	484238	470374	608964	394164	81188		29342	17266	24420	488520	82150	228874	139370	102616	259208	271616	196896	230102
28.72	419.324	420.331	[M+H]+	ION=[M+H]+	22500	30522	27294	31398	31802	33004	28944	31428	30414	27022	24512	25230	27700	33634	31872	24300	25052	25534	27212	28414	29692	32422	33018	31460
28.72	402.299	425.288	[M+Na]+, [M+H]+	ION=[M+Na]+	30938	48516	41856	40986	47982	51096	40336	40628	39390	43380	45404	50134	54082	48186	51436	39970	50682	45750	44720	43974	43576	43890	46032	44382
28.72	170.131	171.138	[M+H]+	ION=[M+H]+	117538	139046	124246	137578	137190	142410	129758	130162	134580	125048	115106	117128	124658	143238	136760	120634	109004	115844	132718	124550	149142	141076	141724	133730
28.75	150.089	151.097	[M+H]+	ION=[M+H]+	57338	61736	58162	60220	62902	65378	60746	64358	65574	59812	64064	64344	60086	63260	63090	61344	60708	62516	60678	59760	63288	60464	62064	62504
28.81	827.565	826.557	[M-H]-	ION=[M-H]-		19134	22090	16966	21328	18664	23296	23378	19624					298	17190	25854	33002	24904	20654		15130	19544	842
28.83	408.285	409.292	[M+H]+	ION=[M+H]+	49772	46470	41224	29770	32582	52590	33664	28336	27102	35454	40702	44614	47072	49458	52978	34582	34544	36074	36078	23970	41574	41356	37620	34130
28.83	159.017	160.024	[M+H]+	ION=[M+H]+		57602			62466		58660	56310		53622	51442	51346		59148	60658			51798	60848			62000	58266
28.84	242.189	243.196	[M+H]+	ION=[M+H]+	22910	21516	22172	21584	18860	24000	23798	19398	20472	19676	20090	19756	20912	21612	24046	18906	20798	20880	22570	21204	24610	25284	21092	20916
28.84	583.466	584.473	[M+H]+	ION=[M+H]+	23920	23906	22970	25930	25316	24706	23646	21990	22402	26202	23086	23744	22184	23142	23544	22142	21776	22776	23618	20734	24764	24506	26536	23556
28.84	269.272	270.279	[M+H]+	ION=[M+H]+	134740	134378	121072	111010	193294	114646	130604	113638	37074	154208	194898	159626	38976	163092	164058	168544	73890	120710	165142	26438	228542	153886	138592	36824
28.85	378.275	379.283	[M+H]+	ION=[M+H]+	42080	33400	45120	6068		11136	14750	11808			3202	8978	7430	67566	42722	15424		7942	5226	2846	36404	14116	12476	12126
28.86	402.297	401.289	[M-H]-	ION=[M-H]-	9536	15820	19890	10550	4182	6738	20916	12894	7244	1724	3400	4418	13108	19576	12130	21642	4356	8120	8988	24538	33680	16190	16414	32774
28.86	428.254	429.262	[M+H]+	ION=[M+H]+	21802	18760	19816	13536	14878	21300	16164	13436	11052	16044	15904	19290	20592	22296	23944	15212	15580	16518	13946	9804	17464	16918	16738	16452
28.92	539.439	540.447	[M+H]+	ION=[M+H]+	34048	32578	34418	33400	38454	35766	33916	34038	33486	33908	30356	31862	33902	34730	34844	31092	30744	31118	33068	33244	34828	34490	34670	32324
28.93	307.287	308.294	[M+H]+	ION=[M+H]+	25462	20458	21486	18126	31382	17274	19460	16126	5652	25644	30020	24154	6144	26898	26610	26574	9728	18916	26176	4590	33462	23308	19594	6276
28.93	426.239	427.247	[M+H]+	ION=[M+H]+	27914	24512	29688		18942	30142	20306			23842	22712	26694	31102	33666	33386			22566		13312	24384	23766
28.99	755.548	756.555	[M+H]+	ION=[M+H]+	49856	4812	63472	54394	13684	57536	74260	57814	48586	47292	20608		13542	6352	18634	41474	21204	47726	64580	68108	60676	59284	49418	49104
28.99	495.413	496.421	[M+H]+	ION=[M+H]+	37754	35634	37594	43020	42104	40938	41462	39386	37552	37448	33962	36272	40884	41872	40066	36926	34508	36518	39078	37618	40794	43134	39808	38964
29	133.151	156.138	[M+Na]+, [M+K]+	ION=[M+Na]+	64782	61364	65042	33982	35218	41976	45770	41682	46370	71802	64100	70860	55768	57070	59594	54802	58470	67912	41770	44700	47916	38536	40860	41132
29.01	757.564	758.571	[M+H]+, [M+K]+	ION=[M+H]+	130054	621290	72542	827508	836756	217460	781750	953058	820668	300072	739450	415320	130694	175750	77158	1000696	818438	388310	740410	668232	705526	680374	712870	589780
29.02	1555.08	778.545	[M+H+H]2+	ION=[M+H+H]2+							12326		9476				3290		3484			9198	148778		164298		169376
29.03	173.121	174.128	[M+H]+	ION=[M+H]+	30650	27090	28884	33292	30822	34340	28862	28562	29704	29008	24662	28328	31450	29904	30418	27058	26428	27042	28522	29082	29248	31736	31300	31152
29.05	780.046	781.053	[M+H]+	ION=[M+H]+				23462	24948	9900	19614	19634	21662					7624	2186				20826	20364	19800	22294	22478	22242
29.05	2316.65	1159.33	[M+H+H]2+	ION=[M+H+H]2+	1266	22346		27804	26806		22910	27688	28348		21380		1110			20690	25202		23286	25072	22786	22478	23958	15846
29.06	434.36	435.367	[M+H]+	ION=[M+H]+	20386	18802	19304	20756	22046	22432	22086	19496	19172	19362	17892	17956	20024	22476	21468	17302	17232	19158	20416	20346	21946	21832	19326	22278
29.06	451.386	452.393	[M+H]+	ION=[M+H]+	34328	31748	34118	39074	37010	36634	34558	33320	34580	34290	31014	32702	33710	33958	35198	29212	29210	32000	36498	32190	33712	37038	38472	34990
29.12	390.334	391.342	[M+H]+, [M+Na]+	ION=[M+H]+	54610	47304	52176	61652	55754	55898	56848	51196	50286	50230	48134	48400	52152	53746	52250	47360	47448	49684	54596	51172	56066	54926	60212	53964
29.14	269.272	270.279	[M+H]+	ION=[M+H]+	35992	30516	34668	29556	50774	28654	31944	28568	9146	35058	39910	35354	10278	43764	42132	34184	14228	28938	37628	7908	53222	40350	32200	9136
29.16	346.308	347.315	[M+H]+, [M+Na]+	ION=[M+H]+	72954	73644	72698	85874	85508	90258	76460	75942	76166	69454	65104	67376	80404	79794	78522	60944	62984	68068	83374	77462	80334	82422	86596	79804
29.17	150.089	151.097	[M+H]+	ION=[M+H]+	54524	52174	55434	63250	62114	66560	57668	55746	55588	54260	49250	52474	56778	55888	59056	44302	48950	53494	59016	59436	56422	61768	62684	60806
29.19	255.256	256.264	[M+H]+	ION=[M+H]+	28984	25500	30498	27848	29230	32020	25056	25206	24718	27210	25150	27218	27366	27306	29838	21430	23378	27146	26120	26524	29148	28540	27818	28490
29.2	1559.09	780.554	[M+H+H]2+	ION=[M+H+H]2+		143204	18884		184048	52502	157210		164972	67660	136942		29796	38688	17774			90218	163420	161214	164298	161796	169376	138142
29.23	106.063	107.071	[M+H]+	ION=[M+H]+	58566	48662	59860	59372	64494	61158	54024	52234	54858	55350	44090	49582	55400	59614	55728		45578	54902	60038	59884	53304	59836	60510	59436
29.23	324.263	325.27	[M+H]+	ION=[M+H]+	67832	42104	70084	45344	52462	67754	41986	36512	37680	52350	31654	44134	66698	66302	72760	26096	28586	48296	46544	45230	48630	49594	49168	50942
29.31	779.545	780.553	[M+H]+	ION=[M+H]+											124468	100554				132132	139024
29.33	803.565	802.557	[M-H]-	ION=[M-H]-	22620	26558	25338	30030	22542	29032	28952	33298	30538				22284	1108		33870	30114	32606	28348	32508		28904	27408
29.41	295.288	296.295	[M+H]+	ION=[M+H]+	38858	32632	32558	32212	56016	28470	35948	30562	9356	37110	45532	39214	8892	43104	45216	38794	15856	27572	43774	6058	60260	40764	34254	10102
29.46	166.986	167.993	[M+H]+	ION=[M+H]+	19610	19014	20520	19516	22044	21384	18766	18738	18156	18152	17710	19134	20430	23230	21090	16824	18196	19000	18924	19562	21284	19990	19720	20374
29.46	307.287	308.295	[M+H]+	ION=[M+H]+	43428	41070	45298	46558	49866	48656	40336	39586	44488	40232	36980	37818	45126	43998	45156	35380	32702	40134	43486	42732	44584	44762	47546	45426
29.48	715.517	716.524	[M+H]+	ION=[M+H]+	152702	16704	69798	150374	45220	173286	156464	125314	173260	193750	98248		40768	20516	52292	105226	61444	130648	108394	111298	140768	129822	99384	111698
29.51	285.099	286.106	[M+H]+	ION=[M+H]+	36446	29144	40224	36852	39098	44488	28174	26004	26314	24582	21526	32028	43760	42136	44386	16994	25478	28906	29992		28552	32830	37292	39628
29.53	783.579	784.586	[M+H]+	ION=[M+H]+	60798	164078	20082	253408	207488	54852	151942	215120	155726	59652	131128	80006	18450	29096	12780	203090	152336	74910	237654	249154	216328	177232	211588	161704
29.61	805.561	806.568	[M+H]+	ION=[M+H]+	68142	131070	15842	140386	82894	23124	123270	169518	194530	84050	64742	36586	4848	18376	4070	162880	45098	36150	122352	58314	173986	165048	159452	79052
29.61	779.546	780.554	[M+H]+	ION=[M+H]+	68956	96510	17154	26432	23220		64692	87626	111228	158120	96568	72582		21272	7072	173956		50396	29326		45738	47114	42680	23132
29.62	512.477	511.47	[M-H]-	ION=[M-H]-	36854	8160	8396	5890	4218	5788	6238	3256	29162	20294	4046	5922	3784	6424	3218	7056	2716	5042	4662	5288	9290	9604	7382	12480
29.62	256.239	255.232	[M-H]-	ION=[M-H]-	158486	44640	52676	38202	33790	31984	39634	27114	126358	105260	38926	42960	31792	48978	25186	45018	21228	31906	37678	39816	56068	57094	43706	67666
29.62	356.165	355.157	[M-H]-	ION=[M-H]-	58478	11558	13372	8880	11892	7954	9262	5394	48554	74618	34682	35966	12610	51890	20538	5640	3432	2692	7786	8044	49750	15836	16932	62426
29.62	263.117	264.124	[M+H]+	ION=[M+H]+		163504	175286	176650	170396	173348	172394	166738	181206	179662	143288	149798		173908	168880	155022	125762	152386	167116		181942	191598	165880	166084
29.63	737.499	738.506	[M+H]+	ION=[M+H]+	40062	4766	18390	24782	9962	32558	27026	20520	29706	44586	14556	3152	9560	6154	12844			21444	17548	17412		23088	18426	19916
29.63	239.244	240.251	[M+H]+	ION=[M+H]+	37070	30606	33094	28298			30704	30070	31766	36954	29872			30786		32150			28546		31276	29066	28390	26992
29.63	238.241	239.248	[M+H]+	ION=[M+H]+	212000		192496				168616		179130	213838				170016								172184	163544
29.64	280.169	279.162	[M-H]-	ION=[M-H]-	5254	3016	3204	10514	11888	7004	4632	3282	7910	33394	23604	23328	5970	6568	5712	2296			9288	8978	11696	16198	14906	15896
29.66	173.12	174.128	[M+H]+	ION=[M+H]+	35646	29600	34344	35048	32776	35084	33370	34380	34266	33504	27174	29902		32854	31840	31406	27756	28776	32374	30324	31704		32918	37018
29.68	333.135	334.142	[M+H]+	ION=[M+H]+	23198	20898	21356	18576	18132	20456	20546	21136	21856	24214	14136	16672	13824	21456	20326	20908		15988	16506	12942	17948	22318	19414	17172
29.71	171.109	172.116	[M+H]+	ION=[M+H]+	39116	21258	30374	29054	29408	31618	27256	25178	25366	25704	19882	21856	28278	28744	30336	18630	18314	20082	27130	25812	27412	28216	29098	29772
29.71	438.126	439.134	[M+H]+	ION=[M+H]+	40064	40788	41000	54178	55256	51458	43294	46130	44296	40810	36122	39634	44976	44194	44210	40430	42744	39492	47322	44754	47476	49794	55322	51000
29.74	285.099	286.107	[M+H]+	ION=[M+H]+	22666	37020	37662	43320	49220	51332	36682	36542	35540	28026	32748	36826	46044	41762	44528	27378	36030	38844	39320	42002	36620	38856	42968	46452
29.76	741.533	742.54	[M+H]+	ION=[M+H]+	21452			25172	9268	17758	18466	13898	22642	13468		3130	4596	3316	6652			9448	21136	21660	26210	20984	16660	18658
29.8	148.016	149.024	[M+H]+	ION=[M+H]+	26786	20674	23144			24330	22982	24408	24032					25760		21180				21448	26332	25530
29.81	805.562	806.569	[M+H]+	ION=[M+H]+	37256	89652	12124	38666			68804	109748	46606	19468			3234	13134	2968	169920		18358	34512		114444	59472	56674	58998
29.82	564.509	563.502	[M-H]-	ION=[M-H]-	77986	16464	22804	7834	3044	5476	14392	11690	24448	13100	3286	2738	8254	18730	7856	16320	3394	5132	7930	20720	35154	18206	12380	54696
29.82	328.26	327.253	[M-H]-	ION=[M-H]-	47792	19050	26168	16590	9760	13684	19206	17442	24586	22242	9384	11082	15660	22276	13538	21148	9890	9024	14946	22608	33232	20482	19804	36410
29.82	382.18	381.173	[M-H]-	ION=[M-H]-	65794	26654	40632	15058	6834	9504	32782	21008	46152	50514	13608	15610	25408	68266	30980	23760	3230	4910	9202	31248	73896	32758	24774	72258
29.82	282.255	281.247	[M-H]-	ION=[M-H]-	309740	113398	132004	79058	44366	54508	102972	87572	143980	100746	44208	45788	82464	124708	71754	110508	40802	57314	73768	131892	194402	119686	92544	231994
29.82	238.241	239.248	[M+H]+	ION=[M+H]+	261916	211898	257220	172006			214828	223410	176928	217610				213128	176602	233566			161912		242478	209386	183154	196252
29.83	173.121	174.128	[M+H]+	ION=[M+H]+		32220	34346	35112	35130		36878	36516	34486			29034	30226	35926	34054			29300	32600		38240	40166	38508
29.83	263.117	264.125	[M+H]+	ION=[M+H]+	200494	181280	195568	195374	157568	174038	197448	189508	181750	171824	132136	138122	150990	195234	175898	173242		143802	172042	159610	209178	209370	187088	192702
29.83	222.159	112.087	[M+H+H]2+	ION=[M+H+H]2+			249704				225804	232714						240284		210820					268730	236388
29.84	333.134	334.141	[M+H]+	ION=[M+H]+	21066		21820	20948	14880	17354			19280	20346	14932	13822	15862	20790	20786		14238	17186	16606	15086	20706	21176	20578	21012
29.88	239.245	240.252	[M+H]+	ION=[M+H]+	44888	35758	42976	29560			36302	39262	30894	34772	29746		26384	37122	32094	40288	29920	30502	30190	27322	42322	35342	31740	37052
29.88	248.192	249.199	[M+H]+	ION=[M+H]+				20448	21088	20950	20762														20670	20210	20610
29.89	801.531	802.538	[M+H]+	ION=[M+H]+	5392	35732	25088	12216	37108	22858	63044	58892	20922			19354	3286	6952	28620	8600	22242	6672	41472	37712	21898	65560	48880	54358
29.89	132.073	133.08	[M+H]+	ION=[M+H]+	45010	42144	42588	45566	44566	44940	45192	45912		43436	40386	40490	42858	45960	43444	42364	40976	40712	43968	42222	46186	46756	45794	46476
29.9	172.156	173.163	[M+H]+	ION=[M+H]+	26282		27152	26816		25218			24750			23494	25168		24622		23596	24686		24232	27164	26608	27290	25494
29.91	168.163	169.17	[M+H]+	ION=[M+H]+	51964	55778	56936	58874	57062	57086	56562	59104	59236	57614	54372	55762	57958	60000	56564	56000	55332	57996	56460	55478	57064	60322	56494	56600
29.93	157.147	158.154	[M+H]+	ION=[M+H]+	37924	35762	36392	35552	34560	35174	36160	35868	36056	35556	36020	34476	37372	36908	35640	34796	34650	36194	34608	33326	36764	37630		35490
29.94	779.549	780.556	[M+H]+	ION=[M+H]+		170862	122278	38494	143508	92884	148878	121460	102304	51664		93180	16242	29474	119650	56966	115596	41078	190288	171460	36766	115494	111874	90710
29.94	257.272	258.279	[M+H]+	ION=[M+H]+		36702			39678		38898										36702		40294	39868			42534
29.96	303.292	304.3	[M+H]+	ION=[M+H]+	39754	38998	38108	42656	42900	44966	40624	40022	40234	37382	39424	38246	42578	38614	41948	38404	42680	37308	40064	41222	41802	45676	42266	42600
29.96	285.099	286.106	[M+H]+	ION=[M+H]+	32374	38322	37594	48140				39530	40346	34068	38832	39272	49476	45112		35104		41362			40316	38426	45758
29.96	194.115	217.103	[M+Na]+, [M+H]+	ION=[M+Na]+		62614							61394	66952		65582	68148	66866	63810		66842	65496						61920
29.96	355.273	356.281	[M+H]+	ION=[M+H]+	26876	25090	26586	30066			27342	27624								25942			29148		27782	29496	28710	27316
29.97	1328.98	665.499	[M+H+H]2+	ION=[M+H+H]2+	20442	19430	19498	22962	25408	24412	23230	22898	21278	18892	20302	20950	22016	24504	22468	19728	19076	21110	23602	22234	23366	23796	22646	23068
29.97	143.976	144.983	[M+H]+	ION=[M+H]+	22832	24006	23672	26778	25908	27488	25768	23982	26820	23628	25664	23222	24388	25492	24756	24042	23758	24544	26396	24176	26144	25976	25770	25084
29.97	241.277	242.284	[M+H]+	ION=[M+H]+	68106	64656	66320	60964	58166	59362	63120	62768	64826	65668	66308	63948	63680	64488	62520	63160	62618	65376	61200	62940	60996	61298	62774	61232
29.98	227.261	228.268	[M+H]+	ION=[M+H]+	67326	67418	68146	68274	67464	68556	71050	70594	71444	70078	67816	67458	71042	68624	69248	69014	69206	71214	69168	68910	69654	67936	69520	65442
29.98	135.014	136.022	[M+H]+	ION=[M+H]+	75024	62754	67176	70352	68908	70990	69572	67422	75130	68742	69328	67044	70638	68920	68238	65212	69318	70728	66460	70876	68240	66744	74450	70954
29.99	283.288	284.295	[M+H]+	ION=[M+H]+	393232	380262	360252	423042	678828	319636	402494	390270	130388	449466	588640	488936	114228	458576	457762	520024	214316	365948	526012	96402	697350	477134	442376	118436
